# Supplementary material for: Bias in the reporting of sex and age in biomedical research on mouse models
Source: eLife. 2016 Mar 3;5:e13615. doi: 10.7554/eLife.13615 (PMC4821800; doi:10.7554/eLife.13615)
Supplement: Supplementary file 1. — DOI: http://dx.doi.org/10.7554/eLife.13615.012 [file elife-13615-supp1.xlsx]

## Sheet: PMIDs Text-mining
PMID	PMCID	JOURNAL	YEAR	PMID "Cardiovascular Diseases"[Mesh]	PMID "Cardiovascular Diseases/immunology"[Mesh]	PMID "Cardiovascular Diseases/therapy"[Mesh]	PMID "Cardiovascular Diseases/physiopathology"[Mesh]	PMID "Cardiovascular Diseases/genetics"[Mesh]	PMID Example "Myocardial Ischemia"[Mesh]	PMID "Neoplasms"[Mesh]	PMID "Neoplasms/immunology"[Mesh]	PMID "Neoplasms/therapy"[Mesh]	PMID "Neoplasms/physiopathology"[Mesh]	PMID "Neoplasms/genetics"[Mesh]	PMID Example "Melanoma"[Mesh]	PMID "Diabetes Mellitus"[Mesh]	PMID "Diabetes Mellitus/immunology"[Mesh]	PMID "Diabetes Mellitus/therapy"[Mesh]	PMID "Diabetes Mellitus/physiopathology"[Mesh]	PMID "Diabetes Mellitus/genetics"[Mesh]	PMID Example "Diabetes Mellitus, Type 2"[Mesh]	PMID "Lung Diseases"[Mesh]	PMID "Lung Diseases/immunology"[Mesh]	PMID "Lung Diseases/therapy"[Mesh]	PMID "Lung Diseases/physiopathology"[Mesh]	PMID "Lung Diseases/genetics"[Mesh]	PMID Example "Pulmonary Disease, Chronic Obstructive"[Mesh]	PMID "Nervous System Diseases"[Mesh]	PMID "Nervous System Diseases/immunology"[Mesh]	PMID "Nervous System Diseases/therapy"[Mesh]	PMID "Nervous System Diseases/physiopathology"[Mesh]	PMID "Nervous System Diseases/genetics"[Mesh]	PMID Example "Alzheimer Disease”[Mesh]	PMID (“microbiology” [Subheading] OR “virology” [Subheading] OR “Parasitology” [Subheading])	PMID ("microbiology" [Subheading] OR "virology" [Subheading] OR "Parasitology" [Subheading]) AND "immunology" [Subheading]	PMID ("microbiology" [Subheading] OR "virology" [Subheading] OR "Parasitology" [Subheading]) AND "therapy" [Subheading]	PMID ("microbiology" [Subheading] OR "virology" [Subheading] OR "Parasitology" [Subheading]) AND "physiopathology" [Subheading]	PMID ("microbiology" [Subheading] OR "virology" [Subheading] OR "Parasitology" [Subheading]) AND "genetics" [Subheading]	PMID Example ("microbiology" [Subheading] NOT "virology" [Subheading] NOT "Parasitology" [Subheading]) AND "Tuberculosis"[Mesh]	PMID Example ("virology" [Subheading] NOT "Parasitology" [Subheading]) AND "HIV"[Mesh]	PMID Example ("Parasitology" [Subheading]) AND "Malaria"[Mesh]
7507509	PMC2191384	PLoS One	1994	11181698	16894012	20603314	22808256	19578071	22853195	19823587	11208862	11696586	20856939	15642165	23840879	24811731	20856927	11489950	20693344	20215428	22606220	24498144	24324595	24324595	20302663	23331548	23331548	21439091	21439091	21439032	20830289	21397024	21383850	23000581	23000581	23000581	19930660	19240062	20174568	23527234	23300932
7507691	PMC1968696	PLoS One	1994	12163563	18947400	20877628	23544146	21858106	22915766	21217823	11225590	16109167	15642165	23842450	18620555	24058525	23243415	12597780	20215428	20522592	24088954	23230000	17620126	21251246	21772663	21496353	23680060	18062806	21439032	21138577	20811645	21383850	21103342	24917595	24917595	24917595	21310755	21347238	18798983	23967147	24509526
7509361	PMC2191407	PLoS One	1994	12618887	19173740	21970837	12745671	22418978	23675503	23463770	11238590	16168101	16457691	15144019	19500366	15175105	11489950	15078896	12745671	19401424	20859605	22279084	16545113	20967278	23331548	21205293	21615971	18489748	21435229	20920207	18823564	21040618	17650315	21933985	21799868	22355341	18823367	23226463	20174628	20403155	22258322
7513013	PMC2191476	PLoS One	1994	12745671	19959238	22151967	17339407	22853195	23759702	22723908	11696586	17397536	19259092	15354213	20706286	22226054	12163565	15988804	19675133	22606220	21270276	23565179	22054060	20591166	24367979	20433763	17617921	19547708	21383057	20830289	23977276	21103342	23951061	24633252	22953001	24236037	19240062	23358433	21789190	24267791	23527295
7515099	PMC2191529	PLoS One	1994	12857598	20026663	22792197	18823569	22915766	19490627	19725984	11748276	17519043	20885974	15781580	22437631	18835934	12186840	17210729	23349479	23977269	21617178	24324595	21547260	20302663	24405692	19649303	22239913	22242171	21264301	20811645	21576125	20886045	21379584	21799868	20547977	24885328	20967263	22013485	23977248	16914051	23325078
7515104	PMC2191509	PLoS One	1994	14594625	20463901	22808256	19077183	23133676	21383058	19898976	12538662	18253127	21390238	16887003	23112819	20436918	12597780	18420485	20522592	24088954	23173044	20587035	21525801	20011050	21499285	19426553	21915293	23617605	21251256	20604940	21492450	17650315	20862226	22953001	23325078	24382758	21347238	18688274	24250805	21439091	23555255
7516409	PMC2191551	PLoS One	1994	14597776	20603314	23437401	19257900	23675503	21718508	20041152	12698199	18267009	22466618	17924978	24938229	22174655	12796471	18477807	19228811	21765850	23482445	20419092	21496353	19799777	20673352	20525249	22937152	17620126	21249202	20462412	21445359	16288566	23737953	20547977	23372751	20379368	21649904	18947414	11157048	21461275	24257155
7516412	PMC2191552	PLoS One	1994	14687413	20649997	23544146	19357782	23716398	23355886	21935422	12732655	18954562	23555747	20107508	20065066	24741073	15078896	18477810	19401424	18288891	19633655	23441611	21383977	19228388	20154695	20174568	24155658	24670210	21249178	19295917	21397024	21575230	17724122	23325078	22355341	23640395	23226463	19680448	12370260	23675429	24949479
7520467	PMC2191643	PLoS One	1994	15154615	20856927	23555672	19578071	23759702	23425860	22867428	12838324	19183492	23842450	20539819	21633700	22853195	15512785	18567821	19651818	18591389	23185548	17620126	21301926	19183492	19794984	18400105	24465666	22118493	21245015	17474994	21383850	23675503	22029666	23372751	24236037	22151967	23358433	19772664	18086300	23864739	25077616
7520469	PMC2191649	PLoS One	1994	15615595	20877628	23560095	19675133	23963753	23675473	23166825	15583018	19262559	24073414	20877462	23045606	19490627	15988804	18793419	19696184	18647412	24339994	16545113	21251246	18798983	18307797	16571105	25170302	23226463	21235806	17428319	21278785	23226463	22730000	22355341	21364875	12461085	24319531	19816561	20518032	17118203	23985023
7520704	PMC3053903	PLoS One	1994	15743533	20930931	23750267	20097729	23963759	23774796	23349943	16109167	19292900	24465768	22020333	12865923	21718508	16192669	18835930	19737384	19208913	18474108	22054060	21249199	18755021	17263874	15279681	24295402	18947414	21274455	16361819	21248377	21998625	23056194	24236037	21912601	12874266	24736406	21060798	20522497	17937810	18446227
7522509	PMC2033404	PLoS One	1994	15770049	21126329	24037190	20680247	24523936	23967310	23628871	16168101	19437017	24466321	22276142	19200397	20097729	17210729	19011680	20040119	20520806	19794060	21547260	21205293	17328802	22194859	24858807	24886716	24068938	21138577	18823564	21040618	22257369	22864021	23091343	23554993	15223610	22013485	22506022	21603208	18062806	21255440
7523421	PMC2120213	PLoS One	1994	15824082	21173104	24349031	21247503	24721803	20173736	22151967	16508635	19754973	24824754	23555570	20422010	22490613	18398138	18984741	21810596	20859605	20852026	21543283	21034845	15955839	22200784	22185646	22279084	24244619	21060663	22493704	21172011	22425995	22959727	24999476	24466007	15869716	17367535	23110112	22844476	18365019	21698182
7525597	PMC2120225	PLoS One	1994	16009717	21451572	24479820	21257611	24736312	20596535	18835934	16536871	19826426	25100208	23648546	20535211	22558265	18420485	19223596	22596053	21270276	23000581	21525801	21144028	15663794	23326543	23680060	23565179	21388530	21048992	23300439	21103342	22606355	24069439	21364875	24676425	16968127	18489748	23826346	23326232	22096530	22640559
7525841	PMC2191729	PLoS One	1994	16103409	21635745	25104735	21274265	24772433	21858224	20585312	16717119	20020049	25114527	16168101	20577802	19151200	18420489	19564459	22606220	21307079	23145054	21505443	21124895	21789190	24040409	21251246	20967263	20462412	20967130	23505411	20886045	22815746	24223856	21912601	24885328	17040574	18627612	24068938	24146869	22723917	23301078
7525843	PMC2191719	PLoS One	1994	16263514	21714902	11181698	21320392	25000405	21904650	20835264	17397536	20027308	18495755	17397536	23173060	21983520	18477807	19628781	22708778	21617178	24997608	21504907	21072213	23300550	24295402	24260587	19175913	21439032	20920207	24489720	20876612	22876937	24278307	23554993	24382758	17298168	18688274	24558422	24313934	24319531	24667548
7525844	PMC2191722	PLoS One	1994	16403953	21716722	12745671	21575230	25047106	21910857	22438954	17519043	20126537	11953867	23585892	23304254	23028874	18477810	19633655	22922341	22297672	15512785	21499285	20967278	21843339	24465740	21595935	22475739	22493704	20861860	24915459	20860833	23671652	22343072	24466007	12538662	17428319	18947414	15781580	20422019	24736406	12874266
7525852	PMC2191775	PLoS One	1994	16894012	21760899	14687413	21677770	22013485	22737215	23049867	17555571	20379368	12011115	23762429	23372655	24466263	18567821	20204176	23554999	22475818	22853195	21496353	20958976	22145040	24886716	24429403	22500123	22761662	20856892	23172920	20849604	23740718	24089686	24676425	22723990	17502662	19060952	24244619	20454613	17367535	18198941
7620319	PMC2275933	PLoS One	1994	17062126	21943217	15824082	21699735	17724122	22876297	23555933	17592641	20390104	15144019	23785504	23468991	22347376	18667079	20485668	23637966	23028588	21718508	21464983	20949022	22952892	21496353	21368561	24520342	22199109	20830289	23762429	20806064	23762378	20640189	23818985	23589566	17961258	19242562	24131481	20463893	18489748	18625037
7620320	PMC2275935	PLoS One	1994	17122889	21970837	16009717	21799893	19351516	23226300	23589679	18085820	20426873	14760388	23840879	23555837	20182516	18776136	20679400	23755196	23173044	24467451	21445321	20830207	24260587	21205293	20843337	24730756	24115583	20827278	22323550	20686515	23762454	20211007	19500366	23991210	17974006	19680448	18282093	23300718	19951425	19845536
7620324	PMC2275942	PLoS One	1994	17225860	21999911	16103409	21858106	19440339	23861876	23875706	18253127	20445751	15067018	24260587	23693134	20215428	18793419	20693344	23835340	23326594	20642857	21390212	20796309	23496860	20958976	19966866	24885161	24463623	20814579	23527092	20593011	23951061	19551139	15781580	24416335	18045466	19772664	18680595	23900170	19390607	21673796
7698080	PMC1566801	PLoS One	1994	17309798	22013485	16403953	21896159	19490627	24058479	24319370	18267009	20498710	15354213	24317954	24127404	22187379	18835930	20805386	23977269	23482445	22204493	21383977	20653947	21595935	20433763	19615076	18755021	18654630	20811645	23710206	20574530	24009314	19014502	24885328	24748051	18402190	19816561	18820742	12461085	19547708	22427811
7843098	PMC1567371	PLoS One	1994	17319968	22151967	17225860	22039489	19546853	24587164	24385308	18495755	20543982	15781580	24348684	24287699	22891211	19011680	20980458	24086307	23823477	17376804	21368561	20628605	21772663	20429932	17803352	20920189	19094215	20700542	24324595	20346117	24469912	21747957	23503473	22235331	18784792	19951425	20174568	20011050	21124875	24156277
7843127	PMC1567432	PLoS One	1994	17325706	22247758	17319968	22039965	19582157	24804235	24811731	18612432	20856939	15987429	24386437	24287723	23185548	19118506	21483778	24308370	23957015	18443203	21304986	20591166	22272324	19811658	17726540	19930612	20498839	20604940	21625635	20169102	24551095	21875408	24382758	20379368	18198941	20071504	21388530	21364878	21159170	24204962
7882922	PMC1567258	PLoS One	1994	17339407	22291096	17325706	22140485	19635863	20097729	25054224	18954562	20885960	16476774	24438073	24358335	24167638	19165346	21690251	24319678	24062246	18497871	21301926	20480160	22563306	19649303	17683579	17915009	20861860	20520819	21689754	19651818	24756152	21918553	12538662	23640395	18625037	20958976	22163058	22363768	21518429	21203568
7889830	PMC1566869	PLoS One	1994	17353357	22479479	17339407	22196041	19662162	21274265	21760899	19029379	21050466	16887003	24885328	24752294	24339994	18984741	22043003	24088954	18793419	18654634	21283768	20433763	22987325	19426553	17284325	24244404	21435229	20498839	21998733	19602296	24844281	22238689	22723990	11238590	18769490	21060798	23527234	23660989	21799855	23886803
7889869	PMC1566650	PLoS One	1994	17592030	22558252	18231608	22418978	19763162	21799893	20219112	19087311	21233857	17047651	11953892	20856939	24467451	19011169	22355341	24392081	18984741	19542200	21251246	20429932	23189147	19060952	23071253	22054060	21949747	20462412	22238680	18955571	24885036	22248049	23589566	18085820	18787692	22238649	23967147	23675482	22046311	11238596
7889889	PMC1566652	PLoS One	1994	17653278	22567156	18464897	22574107	19763163	22140485	23702879	19127288	21294856	17425809	15318939	11953867	20856927	19151201	22367599	24511993	19223596	19578398	21249199	20302663	23331548	18307760	23503473	21144028	22218223	20300628	22343072	18716656	24968028	22632257	23991210	19487422	18798983	22506022	25013927	17132069	22348301	16194280
7906706	PMC2191406	PLoS One	1994	17664290	22792197	18812595	22606357	20040117	23255322	11139319	19183492	21294885	17535972	15910693	21248750	23243415	19223596	22415874	25076419	19633655	19903739	21205293	20123615	23393567	18071588	22437631	24058452	23028722	20193086	22642812	18380890	14728723	23226497	24416335	20808919	19118510	22952678	23000581	20123722	22361388	16584108
7908320	PMC2191453	PLoS One	1994	17724122	22808256	18823569	22695329	20042103	23437254	11208862	19262559	21352555	17540049	17257424	19183492	17967198	19287497	22522620	21765850	20679400	20393148	21034845	20011050	23437361	15967817	23112819	23875733	23237504	20109235	22696017	17922909	11266447	23254291	24748051	22028658	19149901	23110112	22355341	20844587	23967119	17078891
7908325	PMC2191434	PLoS One	1994	17877807	23050732	18835934	22723908	20049703	23596510	11225590	19292900	21394107	17924978	17683579	19292900	20642857	19289457	22547652	24741073	22522620	20424231	20972458	19811658	24367979	19173740	24938229	24303000	23301074	19997557	22761835	17784957	21423608	23184605	17926094	22815882	19183501	23285237	24885328	21445321	24465641	17389241
7909327	PMC2191493	PLoS One	1994	17880731	23144743	19023427	22853195	20174578	23680658	11238590	19437017	21858228	20107508	17726540	20126537	21300912	19564459	22566533	22490613	23383062	20699419	20856202	19799777	24405692	23826346	22039513	22163019	23700470	19660138	22828206	17650315	21379584	23560952	20046879	23251519	19216752	23826346	24382758	22132068	18628947	19759892
7911822	PMC2191562	PLoS One	1994	17893196	23243415	19055794	22870253	21097662	23894446	11259097	19450261	21859450	20539819	17998390	20498710	21810592	19628781	22745325	22558265	23405091	20841608	21804454	19727388	24429403	23285237	23418494	23799102	23902681	19636355	23046563	16288566	21364987	23659495	20107604	22968420	19228388	24068938	20379368	23287128	19318094	19997617
7931058	PMC2191690	PLoS One	1994	17967198	23437401	19077183	22915766	21134260	24223934	11259101	19487422	21976971	20877462	18414588	22426694	21850156	19633655	22751694	17309798	22187379	20876720	21203518	19710930	24489937	24632596	24714917	23936505	23940775	19487416	23129750	24434515	21364922	23686791	21171966	23738889	19357779	24308795	22151967	23469125	20502682	21695116
7931061	PMC2191674	PLoS One	1994	18028541	23460527	19151200	22952736	21383058	24465805	11308262	19557135	22132120	21248750	18471300	22728711	22204493	19799787	23172920	22272240	22891211	21266328	21176193	19649303	24497934	21655295	24884715	24046361	24204622	19295917	23166685	24261472	21347380	24098472	21779166	24587276	19390607	24558422	16968127	20886087	22242171	22675567
7931081	PMC2191709	PLoS One	1994	18036190	23505495	19257900	23028668	21541337	24621388	11308266	19754973	22323550	21605372	18489761	23134699	22664958	20204176	23383062	22272340	23185548	21324932	21144028	19426553	24744681	21756372	25077564	24489575	24416370	19221395	23253693	24821909	21346813	24577081	21943279	22151967	19453438	24632596	17298168	21249199	23617605	22737068
7931082	PMC2191689	PLoS One	1994	18053159	23544146	19357782	23133676	21677783	18053159	11359696	19826426	22426694	21838927	18620555	24487722	23233788	20485668	23405091	23251343	24167638	21347323	21124895	19228388	24755955	22815744	22520446	24495712	24447605	19094215	23418431	24804211	21235769	24655894	22028901	21909275	19547708	24667237	17502662	21589883	17555592	23936541
7931087	PMC2191696	PLoS One	1994	18231608	23555560	19440551	23255322	21718508	20663156	11381087	19888452	22728711	22020333	19322212	24811731	23531147	20490452	23423564	23593350	24339994	21379576	21118573	19187543	20587035	23223614	22563471		25077483	18986535	23593276	24587178	21199860	24858312	22087314	23103862	19686585	24677194	18045466	23133523	17620126	18043758
7947092	PMC2033524	PLoS One	1994	18272007	23555672	19509018	23349479	21779762	20928891	11401324	20020049	22827934	22276142	19397814	18026191	23614016	20547977	23506302	24069457	11900278	21554713	21108830	19183492	23441611	24073252	23515704		25101306	18847493	23638068	24503654	20945165	18461171	22235331	22013485	19707559	15781580	18784792	24198843	19416511	18611257
7947094	PMC2033546	PLoS One	1994	18281503	23560095	19549333	23356671	21859843	21455304	11461091	20027308	22978453	22525425	19500366	18059400	23894672	20625402	23704916	24367585	18474108	21785580	21079759	19060952	21499285	23230000	23555007		16122396	18826638	23840675	24023842	20603624	25213090	22239913	23460527	19712478	22530040	18769490		19461965
7962063	PMC2120232	PLoS One	1994	18289368	23658656	19575006	23418594	22016779	21674616	11487276	20046882	23134699	22647055	19671184	19017389	24215514	20679400	23894487	24708836	19794060	22046400	21072213	19015310	21445321	22279084	24040034		17552104	18654630	23940690	23717557	21179208	21331663	22761662	21635745	19845536	24244619	18798983		20618960
7964455	PMC2191752	PLoS One	1994	18312674	23700419	19578071	23437099	22143460	21917165	11556846	19713997	23139820	22952723	19881541	20158915	25006976	20693344	23917725	24837086	20627935	22438574	21047425	18798983	21368561	23565179	24069341		17581756	18648532	23951051	23705018	21151910	21234330	23131872	11157048	19930660	24131481	19118510		21124900
7964456	PMC2191746	PLoS One	1994	18335242	23750267	19638223	23437254	22245782	21975462	11556848	20065066	23193368	23223138	19966866	20350328	12745671	20805386	24205242	25054159	20686610	22858798	20967278	18755021	21079759	20525249	24204804		19543379	18558011	23977276	23437099	21085654	21103384	23626802	11238596	19956549	15324552	19149901		20923452
7964463	PMC2191753	PLoS One	1994	18410407	23963755	19654889	23577189	22287576	22490613	11696586	20072624	22871992	23429470	20351690	20565783	19675133	20949090	24236037	25113792	20825366	22936178	20958976	18316417	20920189	20967263	24367590		21171973	18489773	24089686	23356671	21044321	20930939	23690930	11602638	20011050	17349048	19228388		22110391
7964465	PMC2191723	PLoS One	1994	18464897	24015822	19675133	23596510	22319452	22558265	11710833	20126537	23184608	23555570	20442768	20573279	23349479	20980458	24728138	12369708	20852026	23442068	20949022	18307760	20843370	20174568	24584660		21345237	18489748	24223903	22952736	20862226	20886088	23866257	12095441	20049711	17597539	19357779		22205939
7964466	PMC2191727	PLoS One	1994	18663123	24037190	19736549	23658728	22465693	22848568	11748276	20174581	23326300	23648546	20706286	20843370	17309798	21364875	24741590	14630569	21270242	23469233	20920189	18086300	20843337	20122285	24732107		21435230	18461171	24498172	22723908	20858605	20730033	24100939	12370260	20070893	18021431	19956549		22626451
7964471	PMC2191751	PLoS One	1994	18665344	24063402	19809508	23675503	22563064	23095212	11748379	20205946	23496860	24196357	20729872	21647330	22272240	21483778	24917595	18288891	21330635	23764993	20843370	18071588	20673352	19727335	21547260		21813860	18227221	24503579	21699735	20844742	20339537	23334328	12461085	20082709	18282093	20138044		24034228
7964480	PMC2191776	PLoS One	1994	18713466	24289479	20068141	23680658	22693452	23935882	11870548	20356394	23527092	24466252	21047425	21984926	22272340	21521873	24811731	18452614	21774832	24043756	20843337	17592641	20644637	19175913	20830207		22647790	17620126	24505322	21575230	20837697	20098622	24652769	12515684	20104254	18671884	20161790		24180253
7964481	PMC2191760	PLoS One	1994	18757477	24349031	20083200	23705018	22709928	24370889	11875743	20379368	23577091	24524628	21307402	22363217	23251343	21690251	22226054	18591389	21896930	24667560	20830207	17449921	20628601	18702818	20653947		22848506	17474994	24516345	20680247	20808828	20049331	24828543	12874266	20111723	18680595	20174628		24163420
7964490	PMC2191770	PLoS One	1994	18757499	24376654	20090943	23716398	22773948	24692845	11943072	20390104	23585892		21285984	22374986	23374104	21722394	18835934	18633116	22460762	24750819	20796309	17403936	20573279	18627612	17403936		23544138	17428319	24587232	19357782	20735819	19823761	20379368	14734525	20138044	18820742	20462412		24670210
7964495	PMC2191803	PLoS One	1994	18795166	24453431	20097729	23717557	22912719	19151200	11953836	20420708	23640395		21368561	22448259	23587270	21765850	20436918	18647412	22900035	19675133	20686609	17328802	20502682	18400105	16134771		23785537	16545113	24677019	19077183	20700442	19936237	23640395	15148336	20161790	19948011	20500892		25266106
7964500	PMC2191795	PLoS One	1994	18812595	24465413	20154713	23759702	22912742	19549333	11953867	20426873	23710206		21396117	23028986	23593350	21799868	20097729	18690293	23000581	22596053	20673352	17257445	20487542	18021431	16100447		24058590	16361819	24804264	18823569	20634955	19936202	19861961	15223610	20174628	20122285	20544012		18270595
7964503	PMC2191783	PLoS One	1994	18823564	24479820	20177653	23894446	23144791	20083200	11953892	20438640	23755121		21496344	23175106	24069457	21799917	19151200	19188430	23093064	23755196	20653947	16324223	20444277	16571105	12573914		24059458	16172261	25150364	23675503	20625482	19917141	21858192	15504823	20186321	20174568	20727202		18439291
7964507	PMC2191761	PLoS One	1994	18823569	24551105	20182516	23963753	23300926	20634944	12011115	20445751	23762429		21811251	23409104	24367585	21912601	21983520	19208913	23137106	25076419	20644637	16224148	20421925	16566828	11748285		24267638	14728723	25281869	23226463	20585470	19565184	21989183	15701174	20208997	21388530	20831818		18954557
7964517	PMC2191759	PLoS One	1994	18835934	24810044	20215428	23963759	23316322	21698117	12019035	20454651	23785504		21857934	23552524	24708836	22025302	23028874	19258215	23145054	24741073	20628605	16164761	20405019	15819984	22844476		24950196	12732654	21576125	21649904	20535211	19196476	23887633	15869716	20405007	22163058	20843337		21122144
7981059	PMC2033696	PLoS One	1994	18925475	24908187	20398385	23977363	23324314	21750701	12085212	20498710	23825648		21966435	23663506	24837086	22043003	20215428	19401434	23437231	22490613	20628601	16134771	20403177	15279681	21615971		21649904	12093873	21533102	25076419	20520806	18700006	24250827	16194280	20462412	22223035	20949022		21791037
8006577	PMC2191577	PLoS One	1994	18947400	24999295	20458275	23977364	23355886	21983520	12085215	20543982	23839490		22028816	24040358	25054159	22329992	22187379	19587356	23549462	22558265	20615237	16100447	20374625	24858807	23077483		24667237	11748281	21492450	21810596	20195368	18648646	11238590	16293190	20500892	22457829	21205330		22118493
8006578	PMC2191544	PLoS One	1994	19023427	25104735	20522592	24023842	23425860	22428064	12085216	20691066	23840879		22039513	24528602	25113792	22355341	22891211	19592619	23742173	22272340	20614019	16091136	20302656	23152932	23189195		17349048	11535635	21483675	24319678	20174443	18648492	18085820	16584108	20505822	23028924	21264351		22396790
8006580	PMC2191563	PLoS One	1994	19052651		20566714	24223934	23457456	22493744	12153762	20700533	23941509		22065899	24555849	20522592	22366893	23185548	20150285	23828045	24708836	20603711	15967817	20170548	20441584	22461453		17597539	11266447	21477373	24392081	20161761	18510752	19487422	16434849	20523738	23056391	21439032		22583751
8006581	PMC2191575	PLoS One	1994	19055794		20585312	24465805	23469284	23028874	12177785	20796309	24064977		22200740	24587106	20823099	22367599	24167638	20349044	24663217	24837086	20591166	15955839	20154695	22185646	22666475		17428319	11257138	21445359	23494125	20047948	17664291	20808919	16545113	20544012	23527234	21483851		22799533
8006599	PMC2191578	PLoS One	1994	19077183		20625500	24503654	23525196	23226938	12204819	20808919	24260587		22206623	24647439	21364932	22384267	24339994	20520806	24827579	12369708	20573279	15663794	19966866	21455304	23285141		23272262	24908187	21445247	24073414	20015957	16260491	22028658	16606669	20591166	23555760	21575169		24278312
8006601	PMC2191541	PLoS One	1994	19079326		20634944	24523936	23700405	23316291	12232765	20856939	24278103		22249125	19087311	21911754	22415874	12745671	20585581	24960177	19188430	20552026	12573914	19593566	24599172	23169007		23300439	24289479	21445057	25100208	20016851	23409038	22815882	16880254	20727202	23773726	21789190		24717449
8018538	PMC2033299	PLoS One	1994	19125184		20680247	24587178	23874215	23951359	12460454	20885960	24317954		21881595	20420708	21933988	22522620	19675133	20847810	24997608	19592619	20546558	12370260	20025728	22475739	23967339		23505411	24015822	21423579	21676234	19878039	23149447	23251519	16914051	20831818	23951243	21909450
8018547	PMC2033309	PLoS One	1994	19139167		20823099	24621388	23921644	24260217	15144019	20937705	24324595		22218393	20454651	22275087	22547652	23349479	20858224	20856927	20150285	20525249	11748285	19930612	22500123	24204651		24489720	22567156	21397024	21693554	19737145	17877807	22968420	16919160	20843337	23967147	21943202
8045934	PMC2120138	PLoS One	1994	19139267		20835264	24721803	24244619	24312159	12515679	21042580	24348684		22244053	21152437	22355248	22558306	20522592	21085588	23243415	20847810	20502682	20649997	19841737	22870297	24283976		24915459	21714902	21383850	21711557	19652708	21593432	23738889	16968127	20949022	25013927	21949840
8046330	PMC2191611	PLoS One	1994	19151200		20949026	24736312	24312398	24391843	12538662	21050466	24350772		22251838	21731676	22536426	22566533	20823099	21318183	15512785	21833015	20487542	19173740	19794984	23360775	24465497		15725345	23230000	21368900	21712989	19484127	21827663	24587276	16995947	21124875	25027664	22053180
8046341	PMC2191614	PLoS One	1994	19173740		20973978	24772433	24586646	24406319	12605714	21060663	24386437		22437631	21811640	23209191	22745325	21364932	20859605	18776136	22164157	20480160	18231608	19657391	23416838	24637581		21720503	18823564	21304989	21738757	19401298	21887366	22151967	17040574	21159170	25101682	22054420
8046344	PMC2191586	PLoS One	1994	19183758		20976059	24804211	24586749	24466263	12644834	21152437	24286311		22595792	22046294	23519150	22751694	21911754	20941479	19011169	23316315	20454613	22205939	19624862	23649820	24498144		21775959	18947400	21304957	21876744	19254928	21918544	17177996	17078891	21205330		22069498
8046347	PMC2191601	PLoS One	1994	19257900		21124789	24887083	24587008	24477215	12685932	21203530	24390633		22693649	23071764	23592918	22773667	21933988	21270276	19799787	23710468	20454501	21789190	19615076	23680060	21505443		23505367	23555560	21304945	21936896	19181682	21955788	18177500	17098966	21264351		22114733
8051207	PMC2120119	PLoS One	1994	19308358		21151895	25000405	20877628	24498880	12698199	21233857	24416401		22736596	24827739	23874911	22792290	22355248	21307078	20547977	24194505	20444277	22844476	19570195	23757602	21504907		23516588	20026663	21299906	21998625	19039037	21978358	18186934	17183687	21310755		22162948
8054271	PMC2033504	PLoS One	1994	19351516		21162750	25047106	21970837	24669277	12732655	21269511	24438073		23028879	15083202	24086665	22953001	23209191	21307079	22329992	24586865	20442777	23826346	19455143	24138138	21464983		24456653	24670210	21278785	22001907	18818193	22096518	18628947	17194199	21347313		22216363
8064224	PMC2191629	PLoS One	1994	19357782		21241519	16894012	22792197	24807380	12778080	21294856	24451168		23029451	17177986	24485356	23028558	23519150	21562077	22366893	24594974	20433763	23300550	19137069	24142648	21390212		24456815	22493704	21264226	22028832	18974863	22222029	19844236	17257445	21364878		22493704
8064227	PMC2191655	PLoS One	1994	19395708		21247503	18947400	24479820	24893162	12799647	21294885	24465710		23043547	17262079	24955140	23071669	23592918	21593201	22384267	24705605	20429932	23251519	19099597	24520342	20972458		22953001	21949747	21248377	22043283	18673548	22393443	21124878	17298168	21375734		22496802
8064236	PMC2191654	PLoS One	1994	19416523		21257611	21943217	16403953	24903055	12817992	21352555	24487722		23102107	17519029	25101679	23093868	23874911	21617178	23071669	24917595	20421925	21615971	18638383	24730756	21203518		16545113	22218223	21224064	22070775	18590543	22644036	21541292	17367535	21423646		22550631
8064237	PMC2191659	PLoS One	1994	19421412		21272305	21999911	19023427	25097276	12835312	21394107	24830315		23112819	18506183	21151899	23155466	24485356	21659497	23155466	22226054	20419140	22059807	18518998	24733017	21176193		18267012	23028722	21209625	22112588	18575605	22697885	21909275	17389241	21423750		22876751
8064243	PMC2191635	PLoS One	1994	19440339		21274265	22013485	19509018	20930931	12838324	21555486	24859530		23117593	19479052	22690119	23251685	24955140	21659782	23325078	19151200	20405019	23077483	18489769	24885161	20686609		18573219	23700470	21040618	22118545	18362179	22870188	22022578	17428319	21423798		22879984
8064245	PMC2191653	PLoS One	1994	19440551		21320392	14594625	19654889	18272007	12838326	21611205	24885328		23118721	19517020	22923475	23139348	25101679	21754921	23372751	25101679	20403177	23119083	18307797		20603711		21251256	23902681	21368864	22132113	18316356	22912745	22087269	17487483	21439032		22889153
8089185	PMC2290947	PLoS One	1994	19454023		21359188	17309798	19809508	18312674	12844362	21633700	23437401		23284678	19951433	23755169	23172920	11467420	21756303	23418596	19171749	20376343	23185614	18026191		20552026		21264301	23940775	21172011	22165993	18250199	22922786	22275865	17500591	21483851		22913428
8089187	PMC2290943	PLoS One	1994	19490627		21364932	17724122	20068141	19820193	12865923	21731676	24811731		23346016	20057943	24416343	23274897	11390440	21810593	23555752	19602537	20374625	23189195	17915009		20107604		21629771	24204622	21122103	22257369	18197975	22984603	22432595	17502662	21518429		22952980
8089190	PMC2290963	PLoS One	1994	19509018		21371300	18053159	20154713	19956623	12914671	21811640	11139319		22402322	20209087	24685144	23325078	11390441	21833015	23717456	19920213	20302663	23285237	17803352		20053284		22054060	24416370	21108841	22363796	17924978	23029293	22485151	17555592	21526210		23000585
8106554	PMC2119922	PLoS One	1994	19546853		21411607	18757499	20182516	21151617	12928149	21813021	11487276		23202800	20361267	24788674	23372751	12369716	22144990	24146886	20977585	20302656	24632596	17726540		19440353		22295118	24447605	21103342	22397316	18021406	23056220	22530040	17612899	21549019		23029425
8113677	PMC2191417	PLoS One	1994	19549333		21431910	18823564	20215428	21540816	14676814	21847079	11748379		23327547	21338489	24848689	23372814	12369723	22164157	23974926	21933985	20967263	21818308	17718922		19404390		22808132	25077483	21060779	22425995	17967183	23119043	22536156	17620126	21575169		23071253
8113682	PMC2191397	PLoS One	1994	19575006		21445362	19125184	21359188	21932360	14709542	21858228	11943072		23328228	21611169	11467420	23383062	11900278	22048734	24673402	21966503	20175905	21843339	17683579		19132132		22848791	25101306	21052083	22466291	17587455	23133641	22606292	17935610	21615956		23101660
8123476	PMC1968871	PLoS One	1994	19578071		21471511	19308358	21701687	21974927	14760387	21859450	11953836		23407024	22272104	11390440	23405091	17116737	22297672	24058525	22110479	20174568	22145040	17284325		18701433		23453057	24667237	20976108	22590551	17338819	23155407	22719879	17939857	21673796		23142821
8132709	PMC2119973	PLoS One	1994	19580648		21487412	19351516	21725681	22327962	14760388	21976971	11953892		23418494	22844466	11390441	23418596	18474108	22475818	15175105	22212431	20170548	22952892	17263874		18498649		23874584	23300439	20976070	22606355	17296794	23217200	23049897	17961258	21708931		23144752
8142251	PMC1968832	PLoS One	1994	19582157		21496220	19440339	22187379	22347376	14760392	22028658	12019035		23437388	22945357	11489950	23423564	18628974	22496773	22853195	22384078	20154695	24204830	17044927		18493606		23951382	23505411	20953205	22645112	17220887	23236499	23103862	17974006	21789190		23181694
8142252	PMC1968811	PLoS One	1994	19592568		21575230	19454023	22238605	22509302	14970872	22046294	12085212		23454868	23031500	12369708	23506302	19073764	22701643	19490627	22470484	20123615	24595157	16719922		18087596		24083230	24489720	20946660	22666365	17158949	23300938	23183846	17987132	21799855		23226464
8145040	PMC2191459	PLoS One	1994	19604372		21622975	19490627	22662117	22870323	15064167	22132120	12085215		23471001	23170076	12369716	23533683	19171749	22851574	21718508	22548048	20122285	21731762	16597326		17617921		24271778	24915459	20923560	22689910	17107623	23254930	23272093	18045466	21813005		23270301
8145050	PMC2191460	PLoS One	1994	19635863		21629780	19546853	22891211	23836162	15067018	22235273	12177785		23503473	22699362	12369723	23554993	19228811	22894755	24467451	22933112	20111698	21789200	16438734		17506901		24447898	22953001	20886067	22815746	16893448	23414597	23617998	18086300	21818288		23284865
8163929	PMC2191470	PLoS One	1994	19638223		21677770	19582157	23143987	24212091	15083202	22323550	12644834		23520486	23123645	11900278	23555752	19401424	23028588	17967198	23027613	20107604	22479178	15703070		17064416		24466045	21629771	20886045	22829961	16681857	23560052	23936541	18402190	21818308		23300550
8163930	PMC2191498	PLoS One	1994	19654889		21698117	19635863	23185548	24454859	15084239	22397502	12778080		23530816	23633513	12163565	23704916	19587360	23173044	20642857	23118741	20067635	22870337	15316568		16571124		24699535	22054060	20876612	22876937	16503978	23565921	23975431	18784792	21818362		23300932
8163944	PMC2191471	PLoS One	1994	19662162		21699735	19662162	23216643	24891297	15113415	22426694	14760392		23548101	23634283	12186840	23717456	19602537	23226517	21300912	23226280	20053284	23620814	12085215		15921521		24903089	22808132	20860833	22912838	15911875	23684315	23985023	18198941	21843339		23254286
8163951	PMC2191486	PLoS One	1994	19671155		21701687	19671155	23285142	24950187	15115540	22448237	15316568		23593291	23957304	15144014	23894487	19651818	23316315	21810592	23069626	19966866	23890251	11405556		15102331		22485151	22848791	20849604	22937957	15710042	23741431	24086435	18248094	21876771		23334235
8175887	PMC2119997	PLoS One	1994	19675133		21702944	19725984	23409043	25166508	15138490	22464650	15318939		23618526	24416207	12597780	23917725	19671194	23326594	21850156	23188390	19593566	24376704	19737862		15084239		15385055	23874584	20806064	22941283	15067019	23775142	24260263	18267012	21909450		23577057
8188752	PMC2120082	PLoS One	1994	19696925		21721026	19752857	23466994		15175105	22479645	15545317		23619564	24438191	12796471	24146886	19696184	23482445	22204493	23274909	20025728	24460618	24811731		12865923		18320052	23951382	20711301	23029379	12642616	23844236	24349565	18489748	21943202		23579784
8195289	PMC2120060	PLoS One	1994	19725984		21725681	19763162	23472096		15198801	22606303	15642165		23841051	24586946	12847137	24205242	19737384	23585733	22664958	23457508	20011050	24651123	23469125		11259097		20596532	24083230	20686515	23110504	12018775	24022509	24587336	18535656	21949840		23592983
8195710	PMC2191530	PLoS One	1994	19736549		21750701	19763163	23675473		15213711	22723990	15703070		23922634	24625085	14630569	24236037	20020058	23597066	23233788	23646149	19930612	24260587	23071253		24146959		21529366	24447898	20673327	23139842	11581289	24030951	22013485	18551169	22046311		23658662
8198963	PMC1969443	PLoS One	1994	19737862		21767374	19849858	23774796		15272933	22728711	15892897		23967178	24756564	15078896	24236066	20040119	23710468	23531147	23700406	19909524	23496860	23503473		17893196		22455545	24699535	20668697	23185565	11257121	24128676	24244619	18554392	22053180		23742026
8207057	PMC2290930	PLoS One	1994	19744321		21772662	19898976	23936343		15316567	22815882	15910693		24034496		15331020	23974926	19794060	23715621	23614016	23776696	19901996	22929887	22969170		21943279		22909213	24903089	20664705	23227269	22291910	24170720	24086273	18573219	22054420		23762234
8270869	PMC2191318	PLoS One	1994	19746160		21786155	20040117	23938286		15316568	22827934	16168056		24058525		15512785	24465383	19920213	23823477	23894672	23852084	19893520	23517578	24209388		22239913		23809248	23172920	20640189	23405058	24278347	24244537	23460527	18575611	22069498		23762356
8270873	PMC2191319	PLoS One	1994	19752857		21799893	20041152	23967137		15318933	22880080	16251872		24079479		15720714	24466007	20383170	23826335	24215514	23874589	19841737	21595935	24023870		24100939		23941427	23762429	20638879	23451282	23737953	24244584	24131481	18625037	22114733		23822604
8270883	PMC2191323	PLoS One	1994	19763162		21816131	20042103	23967310		15318935	22929887	16280035		24098593		15988804	24586733	20512314	23884884	25006976	23977216	19811658	21655295	25047452		21629785		24058668	22323550	20593011	23470541	24244619	24274089	14687413	18627612	22145040		23936115
8270884	PMC2191313	PLoS One	1994	19763163		21858106	20049703	24086273		15318939	22978453	16457691		24166280		16192669	24673402	20627935	23957015	15144014	24188631	19799777	21746810	22226054		21819560		24058676	23527092	20587035	23489026	23324314	24441878	21272305	18637162	22162948		23972034
8294506	PMC2119890	PLoS One	1994	19796257		21896159	20122276	24131623		15354213	23045606	16409625		24278200		16371158	24676425	20627937	24252636	15720714	24194903	19794984	21756372	22437631		23611895		24754900	23710206	20574530	23505062	22912719	24503708	23056479	18654630	22216363		23977248
8294859	PMC2191387	PLoS One	1994	19809508		21911754	20140248	24167638		15467769	23071764	16449199		24376772		17116737	24728138	20628601	24062246	17376804	24244369	19794970	21772663	23112819		23936388		24922308	24324595	20535217	23520469	22319452	24517102	21635745	18688274	22103353		24086456
8294863	PMC2191362	PLoS One	1994	19816649		21933988	20174578	24314261		15538947	23134699	17211473		24382758		17210729	24741590	20660625	24194505	17900348	24386218	19772569	21851604	24938229		24324838		25052055	21624133	20505772	23565247	22016779	24525730	19744321	18716452	22147790		24090087
8294864	PMC2191358	PLoS One	1994	19820193		21980456	20441584	24319687		15545317	23139820	17257424		24681606		17376804	24917595	20686610	24400109	18443203	24633252	19727388	21933390	22426694		24287699		21617178	21625635	20485502	23620781	21859843	24694184	21586133	18769490	22279575		24106222
8294872	PMC2191368	PLoS One	1994	19823587		21983520	20467471	24339994		15545322	23166727	17593960		24694877		17551591	25101835	20711301	24586865	18497871	24823880	19727335	21951864	22374986		21812995		23185548	21689754	20419161	23642031	20049703	24801216	23451182	18787692	22348301		24106230
8294874	PMC2191377	PLoS One	1994	19849858		22016761	20482882	24349299		15579417	23193368	17643202		24714917		17900348		20825366	24594974	18591390	24987707	19710930	22072972	22448259		22327365		24339994	21702922	20419092	23671652	20042103	24846272	11157048	18798983	22361388		24236032
7490285	PMC2200011	PLoS One	1995	19898976		22039489	20638671	24358274		15583018	23234398	17683579		24853419		18232732		20852026	24705605	18633103	25074485	19706153	22134539	23552524		22348342		24750819	21995345	20414748	23737982	19763162	24885175	11238596	18803824	22363768		24250805
7490298	PMC2200003	PLoS One	1995	19956623		22039965	20663156	24392138		15601467	23251519	17726540		24884715		18269730		20977585	25121729	18647955	18667079	19657391	22272324	22039513		22606359		25076419	21998733	20405042	23740718	17724122	24886182	11602638	18811967	22383953		24324734
7494136	PMC2229257	PLoS One	1995	19959238		22073237	20673332	24449804		15642117	23272179	17764562		24938229		18288891		21073732	25142225	18654634	21799868	19649303	22388091	23418494		22701659		19592619	22076159	20405005	23762378	21596768	24893973	11801184	18937835	22427811		24373385
7500009	PMC2192227	PLoS One	1995	20003977		22140485	20723257	24467451		15642165	22871992	17897452		24950740		18398138		21076594		18678617	22953001	19635139	22461453	24714917		22857000		25101679	22078261	20376313	23762454	21641937	24948358	12095441	18947414	22451732		24496826
7500021	PMC2192270	PLoS One	1995	20026663		22187379	20834220	24487918		15651998	22968420	17958915		24979756		18420485		21318185		19196459	23028558	19624862	22563306	24884715		22880004		20482876	22132157	20368804	23798567	21677773	25086961	12141960	18990206	22493704		24497916
7500036	PMC2192233	PLoS One	1995	20040117		22196041	20844591	24504138		15703070	23184608	17971768		24986896		18420489		21135059		19336673	23093868	19615076	22606349	25077564		22973541		20520806	22152221	20346117	23798570	21687686	25089901	12370260	19060952	22496802		24502341
7500037	PMC2192266	PLoS One	1995	20041152		22215019	20928891	24586350		15717926	23326300	17998390		25077564		18443203		21270241		19542200	23274897	19570195	22615967	23139820		23028537		19651818	22196084	20211007	23935936	21760962	18823564	12461085	19079579	22496920		24509526
7500038	PMC2192273	PLoS One	1995	20042103		22238605	21097662	24646493		15781580	23457529	17823781		25079962		18452614		21270242		19542201	22174655	19517020	22666475	24390633		23151305		21810596	22238680	20190273	23936214	21832989	21278785	12515684	19094215	22550631		24597857
7500043	PMC2192263	PLoS One	1995	20049698		22275087	21134260	24933211		15798764	23457589	18026191		24131623		18474108		21330635		19578398	24416343	19466569	22718263	22384017		23234329		24319678	22343072	20179764	23951061	21858002	21248377	12874266	19118510	22583915		24651069
7500049	PMC2192238	PLoS One	1995	20049703		22355248	21151938	25105129		15861499	23457640	18026195		24504138		18477807		21340625		19798418	15331020	19455143	22745831	22472882		22733137		24392081	22471445	20174577	23990976	21882344	18955571	14734525	18800235	22615983		24717726
7500052	PMC2192268	PLoS One	1995	20068141		22418978	21378142	19959238		15892897	23496860	18059400		24397824		18477808		21346176		19794064	18232732	19440353	22788748	22751903		23404288		22144990	22642812	20167811	24086650	21966373	17784957	15090077	19126233	22723962		24898886
7500054	PMC2192225	PLoS One	1995	20083200		22428064	21383058	20026663		15910693	23517578	18226258		11208862		18477810		21464443		19833883	19224872	19426553	22802943	22843615		23437297		22851574	22666471	20161803	24113175	21979052	24821909	15148336	19149901	22761734		24917594
7528766	PMC2191854	PLoS One	1995	20088827		22438954	21455304	20856927		15928667	23527092	18232729		11748276		18483609		21631939		19903739	20482876	19404390	22815744	22929882		23497166		24252636	22675537	20154710	24170981	22008183	21712989	15223610	19183501	22792355		24937303
7528774	PMC2191821	PLoS One	1995	20090943		22454476	21479193	21451572		15987429	23555858	18296888		12538662		18497871		21637761		19934005	20713682	19337513	22815821	23076771		23536778		23172920	22696017	20146790	24260176	22029666	21738757	15263030	19214205	22844473		25072031
7529766	PMC2120333	PLoS One	1995	20097729		22493744	21541337	22479479		15987449	23560112	18362934		12838324		18567821		21687731		20148032	21426317	19228388	22987325	23516616		23565227		23209191	22734047	20098691	24336078	22206005	22466291	15324552	19216752	22876751		25091724
7530760	PMC2191859	PLoS One	1995	20122165		22527284	21673970	22558252		16079073	23577091	18371232		16536871		18591389		21774832		20195523	21441442	19187543	23028636	23627488		23613996		24955140	22747753	20066051	24349101	22170863	22666365	15353557	19228388	22879974		25192845
7532173	PMC2199898	PLoS One	1995	20122276		22536426	21674616	23144743		16105171	23585844	18414588		16717119		18591390		21810596		20200317	21593200	19183492	23028952	23874680		24085151		20711301	22761835	20062542	24364862	22267161	23185565	15385055	19242562	22879984		21933985
7532678	PMC2191918	PLoS One	1995	20140243		22563222	21677783	23243415		16109167	23585892	18447912		20065066		18628974		21896930		20393148	21829729	19175913	23029241	24096601		24199196		22412941	22828206	20007218	24376810	22289655	23565247	15504823	19247447	22889153		24633252
7532679	PMC2191913	PLoS One	1995	20140248		22574107	21687673	23460527		16168056	23589566	18454161		20356394		18633103		21933985		20424231	21852673	19172182	23043753	24101869		24265725		23494125	22866920	20169102	24453891	22290451	23642031	15636635	19273626	22913428		24999476
7532684	PMC2191922	PLoS One	1995	20154713		22606237	21718508	23505495		16168101	23640395	18471300		20438640		18633116		21966502		20522597	22347437	19152704	23151036	24581171		24564886		23524568	22916012	19997594	24009314	22300668	23935936	15701174	19278296	22952892		19500366
7533515	PMC2033642	PLoS One	1995	20173736		22606357	21765887	23555560		16168115	23710206	18489761		20700533		18633594		21966503		20699419	22474415	19137069	23189147	24595136		24307564		23640454	22952904	19865488	24469912	22348087	23936214	15725345	19296832	22952980		23503473
7535341	PMC2191969	PLoS One	1995	20174578		22662117	21779762	23963755		16168116	23717630	18489769		20937705		18647412		21984581		20824098	22615880	19132132	23285141	24669276		24743582		24009454	23028638	19809509	24498180	22394266	24336078	15833115	19357779	23000585		22761662
7537518	PMC2033796	PLoS One	1995	20177653		22666483	21859843	24063402		16207355	23738889	18518998		21203530		18647955		22016649		20841608	22807033	19099597	23169007	24683044		25012362		23587270	23028861	19779609	24512669	22438926	21235806	15869716	19365556	23027614		19861961
7539045	PMC2192046	PLoS One	1995	20182516		22695329	21871134	24376654		16251872	23755121	18560523		21269511		18654634		22110479		20876720	22860063	19087279	23223614	24885518		21850273		22923475	23046563	19651818	24551095	22438980	20967130	16109179	19390607	23029425		21858192
7539046	PMC2192073	PLoS One	1995	20182739		22723908	21917165	24810044		16277667	23762429	18620555		21555486		18667079		22190647		21167066	23133617	19060952	23326368	25030093		21915293		19936237	23049879	19649300	24612480	22533376	21995345	16122396	19416511	23071253		24250827
7540646	PMC2192099	PLoS One	1995	20202211		22848534	21935422	24999295		16280035	23785504	18682714		21633700		18678617		22212431		21190563	23133675	19015310	23331548	25114529		21926978		21187332	23077668	19602296	24756152	22534020	22866920	16194280	19453438	23071620		24086273
7540649	PMC2192097	PLoS One	1995	20215428		22848576	21975462	14597776		16352739	23825648	18816410		22235273		18682834		22315305		21209947	23155382	18798983	23393567	21702963		21970554		22040520	23129750	19571888	24844281	22549942	21573167	16293190	19461965	23101660		14687413
7540652	PMC2192080	PLoS One	1995	20219112		22849299	22016779	15615595		16457691	23839490	18947384		22479645		18690293		22319521		21266328	23393605	18755021	23431396	21831323		22103391		22514596	23166685	19551139	24885036	22558322	21080947	16304607	19468065	23107170		16571131
7543046	PMC1519060	PLoS One	1995	20398328		22853195	22016802	17353357		16318410	23840879	18950535		22723990		18776136		22384078		21267539	23762879	18702818	23437332	21998664		22684844		22961084	23253693	19547708	24965042	22564895	21059265	16584108	19523236	23142821		19414555
7543143	PMC2192148	PLoS One	1995	20398385		22870253	22143460	17653278		16409625	23843936	18976499		23045606		18793419		22403296		21324932	23897951	18701433	23437361	22054012		22937152		23672639	23065637	19527517	24968028	22590645	20479943	16434849	19547708	23144752		19478856
7547232	PMC2034045	PLoS One	1995	20441584		22891211	22216087	17877807		16417656	23892388	19017389		23166727		18835930		22412941		21347323	24098551	18638383	23671638	22126332		23028652		20535211	23418431	19500352	25017386	22627164	20305711	16518469	19557162	23181694		19804649
7556012	PMC1519139	PLoS One	1995	20442854		22915766	22242191	17893196		16449199	23922763	19038046		23457529		19011680		22460762		21379576	24236159	18627612	23815813	22194859		23185540		18506183	23593276	19478831	25042160	22678059	19498425	16533410	19635139	23226464		19915662
7559779	PMC2120591	PLoS One	1995	20458275		22932118	22245782	17967198		16449997	23935856	19099597		23457589		19118506		22470484		21554713	24324833	18518998	23967339	22200784		23341783		21611169	23613811	19326101	25181488	22715999	18400101	16545113	19649259	23270301		20376322
7561676	PMC2192279	PLoS One	1995	20463901		22936985	22253891	18028541		16457726	23941509	20108505		23457640		19165346		22548048		21747824	24391760	18505586	24058452	22238655		23457522		23634283	23638068	19240795	21235806	22730000	21808223	16571131	19680448	23272262		20403155
7561683	PMC2192300	PLoS One	1995	20467471		22952736	22272240	18289368		16476774	23991210	19127268		23589566		18984741		22586590		21785580	24009258	18500976	24073252	22257498		23505426		17924978	23672668	19158948	20967130	22750530	21899735	16579862	19686585	23284865		20509957
7561688	PMC2192301	PLoS One	1995	20482882		23018345	22272340	18410407		16507464	24010981	19137069		23935856		19011169		22596053		22046400	24078137	18498649	24204651	22299046		24044676		23762429	23764848	19154608	20814579	22802922	22511962	16606669	19707559	23285063		20830204
7561694	PMC2192294	PLoS One	1995	20485263		23028616	22287576	18713466		16508635	24023608	19172175		23991210		19073764		22606220		22253613	24326453	18493606	24285922	22427935		24155658		22402322	23805778	19127268	20193086	22914087	22927947	16725047	19710930	23300439		21079759
7561702	PMC2192275	PLoS One	1995	20505761		23028668	22319452	18795166		16524466	24064977	19223911		24098752		19122671		22615750		22072110	24532508	18489769	24367979	22470441		24223895		23437388	23840307	18984744	20109235	22952933	23172351	16880254	19712478	23300550		21379340
7577449	PMC2033931	PLoS One	1995	20517202		23028874	22392450	19139167		16536871	24066030	19259092		24294600		19151201		22649557		22106160	24658034	18400105	23875733	22520446		24236172		24098593	23840675	19017726	19487416	23029339	23320088	16911800	19715582	23300932		21738811
7577450	PMC2033938	PLoS One	1995	20522592		23029168	22465693	19139267		16536875	24098752	19284605		24324806		19156219		22708778		22315318	24886809	18350164	24168764	22563471		24446489		12460454	23927715	18843265	18489748	23033162	23374228	16914051	19727388	23168836		21829583
7577462	PMC2033916	PLoS One	1995	20552221		23029514	22490613	19395708		16563162	24260587	19322212		24416335		19171749		22719219		22438574		18316417	24283976	22587610		24465666		14676814	23935822	20108505	14728723	23056194	23691195	16919160	19759892	23254286		21915347
7577466	PMC2033962	PLoS One	1995	20558441		23049867	22558265	19416523		16611356	24278103	19379509		24613975		19188430		22740171		22492526		18307797	24405692	22654599		24695531		16105171	23940690	19025592	11266447	23119095	23875003	16959038	19772664	23334235		21980477
7588481	PMC1522194	PLoS One	1995	20566479		23056479	22563064	19580648		16672050	24294600	19384424		24633240		19196459		22785174		22509386		18307760	24429403	22685374		24722050		16524466	23951051	19014502	23230000	23166506	23880880	16968127	19774076	23387852		22022603
7588485	PMC1522197	PLoS One	1995	20566714		23099254	22589248	19604372		16704740	24317954	19397814		24748051		19208913		22848482		22596054		18026191	24465497	22947064		25170302		20062078	23977210	18990235	18947400	23209425	24069328	16995947	19802382	23505411		22199109
7593170	PMC2199987	PLoS One	1995	20585312		23110058	22606234	19746160		16704797	24324595	19421372		23144743		19223596		22866906		22645604		18087596	24489937	23326543				20433698	23977276	18955797	24667237	23284626	24086745	17040574	19808255	23516649		22355213
7595199	PMC2192205	PLoS One	1995	20596535		23118941	22693452	19823587		16717119	24324806	19422685		11259097		19224872		22867128		22858798		18086300	24497934	23349887				20453081	24022275	18955571	21702922	23284644	24205258	17069661	19816561	23517052		22258322
7595219	PMC2192179	PLoS One	1995	20603314		23125528	22709928	20049698		16722588	24348684	19455143		11381087		19228811		22900035		22911868		18071588	24637581	23383288				20531304	24025516	18835867	21995345	22846639	24236177	17078891	19845536	23577057		22363472
7595222	PMC2192202	PLoS One	1995	20606253		23133551	22773948	20122165		16759389	24350772	19500366		12460454		19258215		22922341		22933110		18021431	24744681	23431240				20842126	24067070	18826595	22196084	22864021	24252227	17098966	19922665	23579784		22732935
7595226	PMC2192197	PLoS One	1995	20625500		23133676	22802950	20140243		16887003	24386437	19522014		12685932		19287497		22933112		22936178		17915009	24755955	23449983				21314332	24089686	18773080	22866920	22959727	23908553	17118203	19930660	23592983		22900128
7599048	PMC2034110	PLoS One	1995	20634944		23139633	22812644	20173736		17047651	24286311	19527517		12817992		19289457		23000581		22973538		17803352	24782112	23451048				21725368	24168240	18716656	22952904	23087021	24341874	17132069	19930664	23593251		22969170
7599056	PMC2034136	PLoS One	1995	20638671		23143639	22848568	20182739		17114061	24390633	19570195		12835312		19336673		23000933		23226259		17726540	24907978	23460857				22763451	24205293	18648643	21573167	23276394	24732467	17183687	19951425	23653448		23335994
7615640	PMC2199945	PLoS One	1995	20642857		23143987	22867428	20202211		17118152	24416335	19597578		12844362		19401424		23027613		23139354		17718922	24950052	23515704				23065639	24223903	18575617	21541278	23326597	24886239	17194199	19956549	23658662		23349773
7629514	PMC2192123	PLoS One	1995	20644648		23145072	22912719	20398328		17177986	24416401	19607689		12865923		19401434		23091343		23364452		17683579	25058417	23533300				24073414	24244457	18478109	21540242	23335206	24918775	17222058	19956717	23660989		23383181
7642711	PMC2199963	PLoS One	1995	20649997		23166663	22912742	20505761		17177996	24438073	19624862		12914671		19495412		23093064		23442068		17617921		23555007				25100208	24289537	18463734	21533254	23349361	25050360	17257445	19997617	23675482		23527295
7650476	PMC2192159	PLoS One	1995	20657835		23185548	22912870	20552221		17183639	24451168	19671184		12928149		19542200		23118741		23469233		17592641		23667681				24524628	24324591	18380890	21521528	23349684	21138577	17298168	20011050	23723978		24027765
7650482	PMC2192153	PLoS One	1995	20663156		23209191	22977222	20558441		17183660	24465710	19804631		14676814		19542201		23137106		23641944		17533397		23710463				22323550	24330773	18226258	21509823	23349722	20920207	17349048	20016839	23735014		24040376
7650483	PMC2192177	PLoS One	1995	20673332		23209546	23095212	20566479		17135195	24487722	19814783		14709542		19564459		23139632		23717413		17517966		23940606				23527092	24454471	17922909	21483838	23349894	22642812	17367535	20049711	23741368		24115583
7650493	PMC2192151	PLoS One	1995	20680247		23209718	23110048	20596535		17201918	24587276	19841737		14760387		19578398		23145054		23729657		17506901		24040034				23710206	24463292	17897452	21423695	23379588	25281869	17389241	20368812	23741420		24155939
7650494	PMC2192152	PLoS One	1995	20700597		23216643	23119000	20642857		17206489	24613975	19861961		15084239		19587356		23226280		23764993		17450223		24040409				24324595	24468108	17784957	21423608	23390510	21483675	17428319	20052269	23742026		24179562
7657701	PMC2120554	PLoS One	1995	20704721		23226938	23144791	20644648		17211473	24633240	20046875		15113415		19587360		23227273		23835344		17449921		24069341				12085212	24498172	17686156	21399908	23409176	21423579	17485818	20070893	23762234		24209388
7669563	PMC2033870	PLoS One	1995	20723257		23251082	23152932	20657835		17257424	24642245	19593566		15115540		19589179		23285083		23922494		17403936		24098933				17897452	24503579	17683523	21388530	23418536	21304989	17487483	20071504	23762356		24267791
7669585	PMC2033873	PLoS One	1995	20724579		23251382	23166825	20700597		17262079	24748051	19881541		15175105		19592619		22950702		23984430		17328802		24204804				18226258	24505322	17650315	21379584	23457544	21264226	17500591	20082709	23822604		24367713
7698992	PMC2120373	PLoS One	1995	20727187		23251498	23212367	20704721		17397536	24827739	19966866		15198801		19602537		23069626		24043756		17284325		24204926				20108505	24516345	17535104	21364987	23565077	21368864	17502662	20104254	23936115		24463623
7699320	PMC2191967	PLoS One	1995	20823099		23255322	23230000	20724579		17407603	24830315	20066051		15272933		19628781		23099863		24086519		17263874		24244404				19127268	24587232	17192191	21364922	23643691	20946660	17515922	20111723	23936347		24466286
7699333	PMC2191954	PLoS One	1995	20834220		23272265	23251343	20727187		17425809	24859530	20146790		15318933		19633655		23188390		24378208		17262079		24256698				19172175	24643866	16478293	21347380	23755160	20485502	17517966	20138044	23967119		24609135
7710933	PMC2033733	PLoS One	1995	20835264		23285142	23281647	20943418		17450217	24885328	20158915		15467769		19651818		23274909		24411943		17257445		24300094				19527517	24677019	16288566	21346813	23870245	20376313	17547763	20161736	23972034		20547977
7710935	PMC2033720	PLoS One	1995	20844591		23300697	23300926	21124978		17486131	24994118	20167811		15545322		19671194		23349910		24465611		17207287		24349268				20066051	24685353	16250670	21319344	23922229	20154710	17552104	20161790	23977065		23325078
7710948	PMC2033753	PLoS One	1995	20856927		23316291	23316322	21128084		17505514	25059102	20170548		15601467		19696184		23364683		24499025		17183639		24367590				20146790	24804264	16050778	21291534	23936129	20098691	17555592	20174628	23977248		23372751
7710953	PMC2033762	PLoS One	1995	20864429		23334241	23320130	21149301		17506908	23144743	20205934		15651998		19737384		23406154		24521356		17177996		24369446				20167811	24879066	15725345	21253580	23936174	18478109	17578575	20186321	23984396		23554993
7721942	PMC2199907	PLoS One	1995	20877628		23349479	23324314	21151901		17517967	23437401	20209107		15717926		19798418		23432808		24597671		17064416		24295402				20405005	24922480	15134587	21235769	23936403	23472157	17581756	20208997	23991203		12538662
7721948	PMC2199905	PLoS One	1995	20928891		23356671	23349943	21152435		17519029		20350328		15928667		19799787		23437231		24651693		17044927		24465740				20419092	25150364	15152985	21199860	23976996	21750701	17597539	20226037	24023870		22723990
7722440	PMC2191979	PLoS One	1995	20930931		23383297	23355886	21170388		17519043		20351690		15987449		19936237		23451276		24667560		16966083		24550603				20587035	25213090	12720572	20959636	23977020	21655287	17612899	20350393	24053449		23589566
7722443	PMC2192008	PLoS One	1995	20943418		23409043	23374104	21179467		17533397		20360989		16105171		20020058		23457508		24750819		16719922		24584660				20664705	25281869	12085212	20945165	23977274	22347510	17620126	20368974	24073293		23991210
7722447	PMC2191990	PLoS One	1995	20949026		23418594	23383329	21204268		17535972		20405005		16168116		20040119		23494125		25167881		16597326		24731244				20923560		11914135	20603624	24040091	22558216	17635956	20370919	24086456		24416335
7722455	PMC2191992	PLoS One	1995	20950441		23437099	23425860	21217823		17540049		20405019		16207355		19794060		23524568				16571124		24732107				20979661		11781361	21179208	24069439	22837815	17922570	20405007	24090087		24748051
7722461	PMC2192013	PLoS One	1995	20973978		23437105	23457456	21300912		17555571		20419092		16277667		19794064		23549462				16571105		24785085				21060779		24434515	21151910	24109434	23071606	17925880	20428250	24106222		22235331
7734319	PMC2033800	PLoS One	1995	20976059		23437254	23469284	21304971		17565663		20419128		16352739		19833883		23552019				16566828		24886716				22363765		24261472	21085654	24204848	23209315	17935610	20442858	24106230		18085820
7734322	PMC2033805	PLoS One	1995	21042583		23466994	23525196	21324463		17592641		20421925		16457726		19903739		23554999				16438734		25009783				23029301		25315906	21080947	24223856	23289709	17937810	20442871	24156277		23251519
7744960	PMC2120484	PLoS One	1995	21097662		23467882	23587270	21674029		17593960		20421983		16524466		19920213		23563382				16409625		25022445				23078969		25101679	21059265	24244517	23405115	17939857	20462412	24187666		24587276
7759999	PMC2192065	PLoS One	1995	21124789		23472096	23593350	21688176		17598916		20442768		16536875		19934005		23637966				16324223		25053904				23111059		24955140	21044321	24252411	23503602	17961258	20479118	24204830		21909275
7760003	PMC2192050	PLoS One	1995	21124978		23472157	23628871	21724866		17603904		20442777		16563162		20090914		23640454				16224148		25092105				23250422		24876671	20957200	24278307	23531149	17974006	20498839	24204962		23103862
7760010	PMC2192067	PLoS One	1995	21126329		23472207	23634975	21779764		17615082		20454619		16611356		20148032		23646149				16168101		25287866				23441611		24821909	20957154	24324407	23554921	17987132	20498840	24236032		23460527
7760012	PMC2192049	PLoS One	1995	21128084		23519150	23658642	21810592		17640349		20487542		16672050		20150285		23649519				16164761						23762458		24719563	20862357	24344647	23792494	18021431	20500892	24244362		11157048
7760015	PMC2192075	PLoS One	1995	21134260		23549381	23700405	21850156		17643202		20504328		16759389		20195523		23656888				16134771						23955042		24595452	20862226	24316510	23874687	18036255	20505822	24250805		12095441
7775585	PMC2120462	PLoS One	1995	21149301		23555933	23737953	21858224		17650332		20520761		17118152		20200317		23656889				16100447						24176855		24520391	20858605	24363064	23900282	18043758	20518032	24282553		12370260
7790359	PMC2291190	PLoS One	1995	21151617		23564080	23750212	21904650		17650334		20565783		17183660		20204176		23691192				16091136						24416140		24465746	20844742	24428919	24069173	18045466	20522497	24324734		14734525
7790374	PMC2120510	PLoS One	1995	21151895		23577189	23870734	21910857		17655754		20573279		17135195		20209061		23700406				16045796						24423923		24385308	20837697	24480485	24086523	18062806	20523738	24369539		15148336
7790825	PMC2192107	PLoS One	1995	21151899		23589679	23874215	21923911		17683579		20574516		17206489		20349044		23704946				15998787						24615175		23991222	20808828	24496176	24141843	18086300	20540783	24376637		16293190
7807012	PMC2191818	PLoS One	1995	21151901		23592918	23894614	21924378		17726540		20587035		17407603		20383170		23742173				15967817						24997609		23894362	20808797	24531797	24223757	18402190	20544012	24136208		16606669
7807014	PMC2191823	PLoS One	1995	21151938		23596510	23921644	22015461		17764562		20664705		17505514		20393148		23755196				15955839						21060663		23840920	20804589	24587312	24489866	18784792	20591166	24373385		16880254
7807018	PMC2191845	PLoS One	1995	21152435		23600527	23935882	22028848		17893240		20678220		17506908		20424226		23755289				15921521						21217823		23785464	20735819	24642514	24518227	18193944	20618960	24465641		16914051
7822414	PMC2120326	PLoS One	1995	21162750		23610522	23981339	22031820		17897452		20698985		17598916		20424231		23770987				15833106						23463770		23708689	20700442	24655927	24550686	18197175	20625428	24489720		16995947
7822417	PMC2120328	PLoS One	1995	21170388		23614049	24039788	22046433		17907813		20706286		17615082		20461356		23776696				15819984						22723908		23644861	20660618	24663062	24586789	18198941	20630105	24496826		17183687
7822418	PMC2120322	PLoS One	1995	21173104		23644861	24069457	22096514		17925034		20716929		17640349		20482876		23826229				15703070						19725984		23614049	20657731	24686787	24760018	18214602	20653947	24497916		17487483
7836912	PMC2191876	PLoS One	1995	21179467		23658728	24131481	22120709		17926094		20729872		17650334		20485668		23828045				15663794						22867428		23555933	20634955	24907493	25093460	18215283	20657826	24502341		17500591
7836915	PMC2191878	PLoS One	1995	21197579		23675473	24160179	22185646		17940512		20843370		17655754		20490452		23835340				15638941						23166825		23549381	20630068	25032964	25213836	18248094	20661301	24505447		17935610
7836917	PMC2191860	PLoS One	1995	21203502		23675503	24244619	22199120		17941720		20885974		17893240		20512314		23852084				15636635						22438954		23472157	20625482	25158693	20520819	18267012	20667098	24509526		17939857
7836929	PMC2191884	PLoS One	1995	21204268		23680658	24278323	22200760		17945025		20923560		17907813		20520806		23874589				15316568						23049867		23251498	20625437	25188265	22675537	18270590	20711524	24523886		18086300
7836931	PMC2191882	PLoS One	1995	21217823		23705018	24278347	22204493		17958915		20946663		17926094		20522597		23884888				15279681						23555933		23209191	20604941	23762429	22747753	18270595	20722077	24595157		18551169
7836934	PMC2191867	PLoS One	1995	21235823		23708689	24312398	22238670		17971768		20969807		17940512		20547977		23942551				15102331						24385308		23125528	20585470	21998733	23764848	18282093	20727202	24597857		18575611
7869028	PMC2191911	PLoS One	1995	21241519		23709562	24367585	22276189		17989771		20976136		17989771		20559430		23950917				15084239						11308262		23118941	20535211	22343072	24330773	18284631	20815884	24626410		18654630
7869035	PMC2191905	PLoS One	1995	21247503		23716398	24370889	22291917		17998390		20979661		18047653		20585581		23977216				15083202						11461091		23099254	20529328	23951051	21412423	18320052	20831818	24651069		18716452
7869039	PMC2191907	PLoS One	1995	21248698		23717557	24380567	22396765		18043744		21047425		18218118		20625402		23977269				14966344						11875743		23049867	20520806	24089686	21409417	18365019	20843337	24717526		18803824
7869049	PMC2191903	PLoS One	1995	21257611		23759702	24498301	22428044		18047653		21060779		18394172		20627935		24009454				12865923						15861499		22848576	20498848	24223903	21179415	18414675	20861860	24717726		18811967
7869053	PMC2191912	PLoS One	1995	21272305		23762316	24502628	22474431		18085820		21164223		18450814		20627937		24009755				12573914						16704797		22438954	20482876	24587232	20098681	18439291	20886087	24887426		19079579
7869054	PMC2191906	PLoS One	1995	21274265		23774796	24586364	22507957		18162139		21176239		18485879		20628601		24086307				12417483						19150975		22215019	20479943	25150364	19523444	18446227	20949022	24898886		19094215
7880728	PMC2033637	PLoS One	1995	21300912		23785464	24586646	22514734		17823781		21212463		18493606		20660625		24146535				12396477						19956682		21487412	20305711	21368900	19360426	18489748	20958976	24915459		19126233
8522591	PMC2120631	PLoS One	1995	21304971		23801661	24586749	22622501		17924978		21307402		18498649		20679400		24188631				12370260						20150368		21151895	20205720	21209625	19352431	18535656	21048957	24917594		19214205
8529591	PMC1519166	PLoS One	1995	21305033		23840920	24587008	22664958		18026191		20689978		18507854		20686610		24194903				12085215						20209053		21124789	20195368	20976108	19066529	18545662	21060798	24937303		19278296
8557747	PMC2120655	PLoS One	1995	21320392		23874490	24657385	22736097		18026195		21079960		18554389		20693344		24244369				11953867						20615237		20973978	20174443	20886067	18931664	18545685	21092162	24939647		19296832
8593204	PMC3054060	PLoS One	1995	21324463		23874769	24692845	22737215		18059400		21226899		18577984		20699419		24260158				11748285						21048967		20625500	20161761	20640189	18776935	18551169	21103366	25072031		19365556
8593857	PMC1518873	PLoS One	1995	21347255		23874911	24708836	22829869		18177500		21285984		18701433		20711301		24308370				11686901						21673810		20398385	20126456	20638879	18698410	18554392	21124875	25091724		19468065
8770556	PMC2275960	PLoS One	1995	21347410		23875706	24732409	22870288		18186934		21304978		18755030		20713682		24319678				11564614						21818357		19440551	20047948	20535217	18522748	18573219	21124895	25133400		19557162
8786341	PMC2229265	PLoS One	1995	21359188		23877744	24736644	22872161		18215290		21339823		18782851		20805386		24386218				11405556						21968439		17225860	20015957	20211007	18059472	18575611	21124899	25192845		19649259
8903182	PMC2626889	PLoS One	1995	21364932		23894348	24747816	22876297		18218118		21368561		18808719		20824098		24391749				11283152						22355603		24804211	19455148	20161803	17183681	18611257	21124900	21933985		19930664
8924760	PMC2275966	PLoS One	1995	21371300		23894362	24831292	22911746		18226258		21386129		18823562		20825366		24088954				11259097						22392507		24587178	20021638	20062542	25108425	18625037	21139679	24633252		20368812
8924761	PMC2275962	PLoS One	1995	21372780		23894446	24837086	22981861		18232729		21390238		18826639		20841608		24150608				24858807						22428048		24503654	20016851	20007218	23640454	18627612	21159170	23091343		20052269
8924765	PMC2275967	PLoS One	1995	21378142		23936343	24886391	22984613		18253127		21396117		18958307		20847810		24251534				24324506						22447225		24023842	20015370	19809509	22961084	18628745	21203588	24999476		20161736
9700357	PMC2275950	PLoS One	1995	21383058		23938286	24958777	23024758		18267009		21407213		18974783		20852026		24392081				24303000						22736457		23717557	19961569	19649300	21611169	18637162	20922456	23818985		20226037
9700358	PMC2275953	PLoS One	1995	21411607		23951359	25054159	23149447		18296883		21445304		18985036		20858224		24473561				19744321						22957072		23705018	19878039	19571888	21695208	18648508	20923452	19500366		20368974
8546905	PMC2074319	PLoS One	1996	21431910		23963753	25056698	23226300		18296888		21448340		19098995		20876720		24511993				19737862						22986529		23437099	19737145	19551139	21755005	18654630	21183481	23503473		20370919
8551223	PMC2192412	PLoS One	1996	21445362		23963759	25113792	23233788		18327293		21479246		19107213		20949090		24533087				17880731						23448290		23356671	19719848	19017726	21841757	18671884	21205330	22761662		20442858
8551230	PMC2192409	PLoS One	1996	21451572		23967137		23288947		18349828		21496344		19029948		20977585		24633252				20649997						23638013		22952736	19710907	19014502	21980472	18680595	21208931	19861961		20479118
8551238	PMC2192408	PLoS One	1996	21455304		23967310		23308255		18350164		21573168		19132132		21073732		24663217				19173740						23696872		22723908	19680561	18955797	22020633	18688274	21249199	21858192		20498839
8551241	PMC2192424	PLoS One	1996	21455723		23977363		23387955		18362934		21647330		19152710		21076594		24823880				24811731						23744272		22574107	19652708	18648643	22403710	18703526	21251256	21989183		20498840
8551243	PMC2192401	PLoS One	1996	21471511		23977364		23451234		18371232		21663677		19173004		21085588		24827579				23300697						24580964		21699735	19630993	17535104	22423893	18716452	21256128	23887633		20518032
8551244	PMC2192429	PLoS One	1996	21479193		23985377		23463770		18394172		21672263		19194513		21167066		24875130				18231608						23675503		21575230	19592619	16250670	22427802	18769490	21264301	24250827		20522497
8551245	PMC2192404	PLoS One	1996	21487412		23991222		23469285		18414588		21699694		19200397		21187332		24960177				24736644						21750701		20680247	19498425	15134587	22628224	18787692	21264351	18628947		20540783
8554976	PMC2074291	PLoS One	1996	21496220		23994834		23470715		18433501		21711565		19209227		21190563		24987707				23152932						23963759		19357782	19484127	24339994	22723836	18798983	21276251	24086273		20630105
8554982	PMC2074277	PLoS One	1996	21533112		24023842		23525427		18447912		21738579		19255062		21209873		24997608				20441584						17724122		19077183	19401298	23472096	23049854	18802469	21310755	14687413		20653947
8554986	PMC2074278	PLoS One	1996	21540816		24052074		23525445		18450814		21772266		19300524		21209947		24999476				19752857						19763162		18823569	19379487	23185548	23173713	18803824	21347313	21272305		20657826
8595168	PMC2074445	PLoS One	1996	21541300		24067190		23531147		18454161		21774594		19394325		21318183		25074485				24146959						20042103		24339994	19254928	19809508	23249765	18811967	21364878	23056479		20667098
8601592	PMC2120751	PLoS One	1996	21541337		24086273		23593329		18471300		21779410		19404390		21318185		25076419				22185646						20049703		23472096	19181682	24115583	23284831	18816375	21375734	15725345		20722077
8601607	PMC2120785	PLoS One	1996	21562078		24086665		23614016		18485879		21811251		19440353		20859605		25077824				17893196						21859843		23185548	19171071	24463623	23300905	18820742	21385425	16533410		20861860
8601611	PMC2120780	PLoS One	1996	21569241		24098750		23637775		18489761		21833029		19450255		20876715						21455304						22016779		19809508	19039037	22402322	23316765	18823367	21390155	16571131		21103366
8603917	PMC2120743	PLoS One	1996	21575230		24131623		23705026		18489769		21857934		19461893		20941479						23453057						22319452		21750701	18832330	23437388	23326437	18854818	21412420	17132069		21124899
8603922	PMC2120737	PLoS One	1996	21586133		24167638		23741427		18493606		21858192		19466569		20980458						24260397						22693452		23675503	18818193	24098593	23382963	18922185	21423646	17485818		21139679
8603923	PMC2120736	PLoS One	1996	21622975		24175283		23749231		18495755		21921942		19528295		21107520						22205939						22912719		22242171	18974863	21611204	23462987	18937835	21423750	17635956		20922456
8609166	PMC2120795	PLoS One	1996	21629780		24204892		23782924		18498649		21951588		19545444		21135059						24717449						23324314		23617605	18947414	21747957	23468919	18947414	21423798	18545685		21183481
8609176	PMC2120800	PLoS One	1996	21635745		24223204		23825571		18506183		21966435		19656388		21266328						21789190						19809508		23226463	18945333	21765802	23536825	18954557	21435229	18823367		21208931
8611397	PMC2074272	PLoS One	1996	21673970		24223934		23840758		18507854		21984926		19657370		21267539						22844476						23472096		22761662	18854053	21809420	23577177	18990206	21439032	19240062		21256128
8611408	PMC2074259	PLoS One	1996	21674029		24224032		23853091		18518998		21989183		19673534		21270241						23300718						20026663		24115583	18803809	21829175	23630570	19018284	21439091	19318094		21412420
8627151	PMC2192442	PLoS One	1996	21674616		24244746		23861876		18547137		22014088		19680549		21270242						23900170						23555560		24463623	18673548	21850191	23663320	19032740	21461275	19414555		21435229
8627153	PMC2192441	PLoS One	1996	21677770		24260217		23894672		18554389		22022259		19701453		21270251						23469125						17877807		21649904	18590543	21900963	23717459	19036130	21481258	19478856		21439091
8627154	PMC2192457	PLoS One	1996	21677783		24260554		23903056		18560523		22028816		19730731		21270276						23826346						18289368		23272262	18575605	22046307	23764200	19055736	21483851	19575005		21461275
8627161	PMC2192465	PLoS One	1996	21687673		24312159		23957944		18577984		22039513		19737405		21307078						24558422						18410407		21720503	18495020	22355654	24188129	19060952	21518429	19804649		21525801
8627163	PMC2192469	PLoS One	1996	21688176		24314261		23977256		18612432		22065899		19787069		21307079						23071253						20049698		21775959	18400101	21850052	24204618	19079579	21525801	19915662		21603208
8627165	PMC2192450	PLoS One	1996	21695272		24319370		23999067		18620555		22073198		19823681		21324932						23300550						20140243		23505367	18362179	21875408	24301648	19094215	21526210	20069051		21615971
8627170	PMC2192435	PLoS One	1996	21698117		24319687		23999526		18628947		22107808		19888321		21330635						23503473						20202211		23516588	18316356	21918553	24312364	19118510	21549019	20011066		21628500
8630273	PMC2074519	PLoS One	1996	21699735		24324578		24058479		18682714		22114492		19924303		21340625						22969170						20558441		24456653	18250199	22130448	24336108	18800235	21575169	20049326		21654804
8630274	PMC2074506	PLoS One	1996	21701687		24324637		24066149		18700973		22147993		19930549		21346176						24209388						20657835		24456815	18197975	22238689	24055500	19126233	21589883	20123722		21655107
8636240	PMC2120827	PLoS One	1996	21702944		24324736		24098534		18701433		22165848		19956606		21347323						23251519						20704721		25076419	17924978	22248049	24284732	19149901	21603208	20376322		21698140
8642244	PMC2192310	PLoS One	1996	21714902		24339994		24106270		18755030		22179060		19956719		21364875						21615971						20943418		21810596	18030339	22279584	24361736	19178704	21615956	20403155		21772664
8642246	PMC2192312	PLoS One	1996	21716722		24349299		24146959		18782851		22200740		20003387		21379576						22059807						21128084		24319678	18021406	22351600	24454724	19182773	21615971	20453872		21789257
8642256	PMC2192322	PLoS One	1996	21718508		24358274		24147020		18808719		22206623		20011522		21426317						23077483						21688176		24392081	17967183	22388933	24533166	19183501	21628500	20502682		21814172
8642262	PMC2192328	PLoS One	1996	21721026		24385308		24204574		18816410		22249125		20015407		21441442						23119083						21779764		22851574	17900358	22395529	24630364	19214205	21629771	20505762		21936899
8642263	PMC2192329	PLoS One	1996	21724866		24391843		24205036		18823562		22363217		20027305		21464443						23185614						22015461		22412941	17623103	22442732	24641683	19216752	21654804	20509957		21949747
8642269	PMC2192335	PLoS One	1996	21725681		24392138		24215514		18826639		21666721		20046869		21483778						23189195						22028848		23494125	17587455	22447154	24655393	19228388	21655107	20573188		22059807
8642272	PMC2192338	PLoS One	1996	21750701		24397824		24223214		18925932		21743498		20046879		21521873						21943279						22031820		23524568	17349048	22475209	24788298	19240062	21673796	20657653		22086488
8642280	PMC2192346	PLoS One	1996	21760899		24406319		24312245		18947384		21881595		20062078		21554713						22239913						22046433		24009454	17338819	22509403	24858858	19242562	21687549	20830204		22194944
8642289	PMC2192355	PLoS One	1996	21765887		24449804		24324556		18950535		21938482		20062804		21562077						24100939						22238670		22040520	17296794	22632257	24915960	19247447	21687676	20844587		22194770
8642299	PMC2192365	PLoS One	1996	21767374		24465746		24337353		18954562		21986948		20092659		21593200						21629785						22911746		22514596	17220887	22640474	25101829	19266027	21695116	20967263		22203861
8642323	PMC2192549	PLoS One	1996	21772662		24465805		24339930		18958307		22037215		20107604		21593201						21819560						23149447		22402322	17158949	22848851	25312309	19273626	21695169	21079759		22218223
8642324	PMC2192591	PLoS One	1996	21779762		24466263		24346830		18974783		22045025		20140201		21617178						22235288						23451234		23437388	17107623	23028819	25344697	19278296	21698140	21203568		22272321
8642326	PMC2192575	PLoS One	1996	21779764		24466304		24391948		18976499		22218393		20161707		21631939						23593362						23853091		24098593	17052333	23029491		19296832	21708931	21251300		22348321
8642337	PMC2192581	PLoS One	1996	21786155		24467451		24465508		18985036		22226054		20169192		21637761						23611895						23957944		24073414	16893448	23049975		19302708	21731484	21347238		22407806
8642341	PMC2192541	PLoS One	1996	21799893		24477215		24489659		19017389		22242155		20174572		21659497						23936388						24098534		25100208	16842619	23226497		19318094	21731643	21379340		22451731
8642342	PMC2192554	PLoS One	1996	21810592		24485356		24498071		19029379		22244053		20195545		21659782						24324838						24465508		22363765	16681857	23231953		19357779	21731762	21445321		22479635
8647899	PMC2199871	PLoS One	1996	21816131		24487918		24498194		19038046		22251838		20214788		21687731						22952678						24529306		23029301	16503978	23254291		19365556	21738266	21526217		22553482
8664113	PMC2074558	PLoS One	1996	21829488		24490809		24498325		19087311		22279574		20298593		21690251						23285237						24886907		23078969	16220146	22773755		19371445	21750671	21623605		22563475
8664114	PMC2074533	PLoS One	1996	21829553		24498880		24529306		19098995		22280969		20334655		21722394						24632596						18823569		23111059	15911875	23184605		19390607	21765962	21649904		22615570
8666670	PMC2120844	PLoS One	1996	21844895		24503654		24586312		19099597		22347450		20346151		21747824						23056391						19077183		23250422	15861499	23188827		19414555	21772664	21672221		22615863
8666890	PMC2192536	PLoS One	1996	21850156		24504138		24587164		19107213		22348081		20406497		21754921						21818308						19357782		23441611	15710042	23380860		19416511	21789190	21673955		22647789
8666892	PMC2192500	PLoS One	1996	21858106		24520391		24667691		20108505		22351932		20422010		21756303						21843339						20680247		23762458	15067019	23388701		19424499	21789196	21695273		22662179
8666893	PMC2192497	PLoS One	1996	21858224		24523936		24670382		19029948		22363765		20429921		21765850						22145040						21575230		23955042	12642616	23560952		19453438	21789200	21698150		22679519
8666897	PMC2192478	PLoS One	1996	21859843		24558445		24690995		19127268		22374986		20429939		21774832						22952892						21699735		24176855	12018775	23658612		19461965	21789257	21709627		22713837
8666898	PMC2192475	PLoS One	1996	21871134		24586350		24705922		19127288		22384017		20433698		21785580						24023870						22574107		24416140	11581289	23659495		19468065	21799855	21720503		22722865
8666900	PMC2192492	PLoS One	1996	21878944		24587178		24719553		19132132		22419113		20435547		21799868						24204830						22952736		24423923	11257121	23667480		19478856	21813005	21738270		22808250
8666901	PMC2192516	PLoS One	1996	21896159		24587248		24729664		19137019		22427843		20439541		21799917						24595157						23356671		24615175	22291910	23686791		19478875	21814172	21738709		22823934
8666903	PMC2192535	PLoS One	1996	21904650		24595452		24755147		19137069		22432006		20440269		21810593						25047452						23437099		24997609	22235247	23785461		19489577	21818288	21738811		22826298
8666906	PMC2192502	PLoS One	1996	21910857		24621388		24804235		19150975		22437631		20453081		21810596						21731762						23705018		22447225	25056698	23846963		19513118	21818308	21775959		22844476
8666907	PMC2192531	PLoS One	1996	21911754		24646493		24886907		19152710		22448259		20454618		21810600						21789200						23717557		24580964	24886391	23873129		19523236	21818362	21829583		22866923
8666922	PMC2192489	PLoS One	1996	21917165		24662163		25006976		19172175		22458853		20473309		21818396						22479178						24023842		21611204	24831292	23935126		19543379	21843339	21853049		22897969
8666923	PMC2192523	PLoS One	1996	21923911		24669277		25017872		19173004		22470504		20494973		21829729						22870337						24503654		21625423	24732409	23936499		19547708	21858123	21915347		22970147
8666928	PMC2192485	PLoS One	1996	21924378		24686534				19183492		22472882		20525249		21833015						23620814						24587178		21655287	24498301	23951225		19557162	21860372	21980477		23028722
8666946	PMC2192474	PLoS One	1996	21926268		24719563				19194513		22496756		20531296		21852673						23696894						24804211		21660140	24278347	24056696		19558687	21876771	21998712		23077483
8666951	PMC2192480	PLoS One	1996	21932360		24721803				19200397		22500097		20531304		21896930						23890251						18947400		21674808	23750212	24069332		19575005	21887316	22022603		23107128
8676068	PMC2192623	PLoS One	1996	21933988		24736312				19209227		22532830		20535211		21912535						24376704						14594625		21676234	23737953	24098472		19578403	21906319	22132068		23119083
8676081	PMC2192592	PLoS One	1996	21935422		24772433				19223911		22593679		20565978		21912601						24460618						18823564		21693554	23587270	24124461		19578432	21909450	22162746		23144845
8676083	PMC2192614	PLoS One	1996	21943217		24804211				19255062		22595792		20585617		21926270						24651123						19849858		21711557	23166825	24124525		19635139	21931831	22199109		23151408
8676084	PMC2192625	PLoS One	1996	21949858		24807380				19259092		22605931		20613874		21933985						21750709						20122276		21712989	23119000	24124567		19649259	21936899	22355213		23166492
8676085	PMC2192602	PLoS One	1996	21970837		24811731				19262559		22615798		20615255		21966502						22651370						20140248		21738757	23110048	24223972		19649318	21943202	21617969		23166721
8676086	PMC2192618	PLoS One	1996	21974927		24821909				19262696		22621282		20630075		21966503						22905869						20673332		21738789	22867428	24312227		19650917	21949747	22242171		23166823
8682871	PMC2120897	PLoS One	1996	21975462		24840793				19284605		22624014		20657647		21984581						23936793						21151938		21747957	22242191	24349043		19674447	21949840	22258322		23185614
8688321	PMC2074587	PLoS One	1996	21980456		24876671				19292900		22629369		20663219		22016649						24465940						21479193		21765802	21871134	24392452		19680448	22029431	22328592		23189195
8688322	PMC2074563	PLoS One	1996	21983520		24887083				19300524		22640261		20676139		22025302						22226054						21687673		21786300	21687673	24455732		19686585	22046311	22363472		23209417
8688332	PMC2074574	PLoS One	1996	21986317		24893162				19319191		22662126		20686609		22040520						22437631						21871134		21809420	21479193	24225640		19703109	22053180	22393351		23226456
8691138	PMC2192682	PLoS One	1996	21997041		24903055				19322212		22693649		20730114		22046400						23112819						22242191		21829175	21151938	24356899		19707559	22054060	22507741		23237504
8691140	PMC2192684	PLoS One	1996	21999911		24933211				19337237		22704648		20731828		22070978						24938229						23110048		21843349	20673332	24495352		19710930	22054420	22529974		23271968
8695350	PMC2074637	PLoS One	1996	22013485		24954347				19351417		22736596		20735817		22087215						24287699						23119000		21850191	20140248	24569833		19710944	22059807	22732935		23284939
8760795	PMC2192694	PLoS One	1996	22015461		24955140				19360105		22744210		20810787		22123298						22426694						23230000		21850243	20122276	24572785		19712478	22069498	22900128		22692455
8760797	PMC2192736	PLoS One	1996	22016761		24965024				19379509		22745537		20838603		22144989						22374986						23737953		21876744	19849858	24577081		19715582	22086488	22969170		23301074
8760813	PMC2192709	PLoS One	1996	22016779		24998254				19384424		22751903		20842126		22144990						22448259						23750212		21876755	19725984	24605339		19727388	22110391	23082163		23326232
8760822	PMC2192738	PLoS One	1996	22016802		25000405				19394325		22788551		20862307		22164157						23552524						24278347		21900963	24244619	24642694		19737864	22110673	23082205		23383295
8760824	PMC2192717	PLoS One	1996	22022523		25047106				19397814		22805330		20926645		22253613						24260587						24498301		21909419	23324314	24655894		19759892	22114681	23133377		23386437
8761364	PMC2074671	PLoS One	1996	22028848		25054224				19404390		22842729		20932318		22043003						22039513						24732409		21931779	22912719	24705452		19759900	22114733	23226463		23497610
8761365	PMC2074664	PLoS One	1996	22031820		25097276				19404394		22843615		20942901		22048734						23418494						24831292		21931787	22319452	24781921		19763257	22145040	23287128		23527208
8761377	PMC2074659	PLoS One	1996	22037736		25101679				19421372		22848504		20956380		22072110						24714917						24886391		21936896	22016779	24784230		19772664	22162948	23335994		23555255
8769413	PMC2120962	PLoS One	1996	22039489		25105129				19422685		22879947		20967026		22106160						24884715						25056698		21998625	21859843	24824433		19774076	22168579	23349773		23555725
8781400	PMC1469662	PLoS One	1996	22039965		25280587				19437017		22905243		21048983		22110479						25077564						17225860		22001907	20049703	24858312		19802382	22194944	23358433		23570545
8781405	PMC1469641	PLoS One	1996	22046433		25315906				19440353		22916251		21049054		22190647						21812995						19440551		22022192	20042103	24923195		19804649	22205939	23359320		23577080
8786337	PMC2192714	PLoS One	1996	22073237						19450255		22916270		21079779		22210314						22327365						20398385		22028832	19763162	25079250		19808255	22216363	23383181		23637827
8794855	PMC2120985	PLoS One	1996	22074227						19450261		22929882		21080971		22212431						22348342						20625500		22029605	17724122	25079853		19812690	22355204	23437211		23658634
8794863	PMC2120974	PLoS One	1996	22096514						19455143		22935382		21085595		22249311						22606359						20973978		22043283	21617178	25154628		19816561	22103353	23459556		23671716
8794866	PMC2120972	PLoS One	1996	22110719						19461893		22957017		21085651		22297672						22701659						21124789		22046307	22144990	21249202		19823583	22147790	23469125		23675429
8794872	PMC2120987	PLoS One	1996	22120709						19466569		22970136		21108830		22315305						22857000						21151895		22070775	24252636	21245015		19841748	22194770	23505367		23698100
8830784	PMC2120999	PLoS One	1996	22132116						19479012		23002387		21113097		22315318						22880004						21487412		22073162	24524628	21048992		19845536	22203861	23516588		23700470
8834864	PMC1469252	PLoS One	1996	22132159						19479052		23024755		21124841		22319521						22973541						22215019		22073306	21596768	20861860		19859545	22218223	23527295		23734932
8858175	PMC2121015	PLoS One	1996	22140485						19487422		23028879		21171966		22329992						23028537						22848576		22112588	21639930	20856892		19909524	22238649	23555678		23784148
8858176	PMC2121021	PLoS One	1996	22143460						19500366		23028986		21203518		22347437						23151305						23099254		22114680	21641937	19660138		19915662	22272321	23617605		23785507
8858180	PMC2121032	PLoS One	1996	22151967						19517020		23029301		21209895		22347463						23234329						23118941		22118545	21677773	19094215		19922665	22279575	23710083		23820163
8875160	PMC1469447	PLoS One	1996	22152337						19522014		23029451		21210965		22355341						22733137						23125528		22132113	21687686	18654630		19930660	22295118	23717701		23840854
8879191	PMC2192825	PLoS One	1996	22164282						19527517		23034331		21311099		22366893						23404288						23251498		22140466	21698255	18648532		19930664	22316002	23886803		23864739
8879198	PMC2192833	PLoS One	1996	22185646						19528295		23041950		20577802		22367599						23437297						23472157		22165993	21708955	18558011		19948011	22347409	23903059		23874808
8879200	PMC2192838	PLoS One	1996	22187379						19545444		23043547		20972458		22384078						23497166						23549381		22216257	21760962	18461171		19951425	22348301	23968249		23900173
8879212	PMC2192824	PLoS One	1996	22194810						19557135		23046546		21241512		22384267						23536778						23614049		22355654	21808223	16172261		19956549	22348321	24022374		23902681
8879215	PMC2192815	PLoS One	1996	22196041						19564944		23055722		21276249		22403296						23565227						23644861		21638029	21818352	11535635		19956717	22361388	24023628		23902802
8879219	PMC2192843	PLoS One	1996	22199120						19570195		23055814		21297660		22412941						23613996						23708689		21850052	21832989	23555560		19997617	22363768	24027765		23903655
8879230	PMC2192807	PLoS One	1996	22200760						19597578		23056173		21297973		22415874						24040160						23785464		21875408	21854582	20026663		20011050	22383953	24037197		23940775
8879233	PMC2192848	PLoS One	1996	22204493						19607689		23071702		21306648		22438574						24085151						23840920		21918553	21858002	23902681		20016839	22407806	24040376		23951007
8880004	PMC1469666	PLoS One	1996	22215019						19624862		23074115		21311773		22442300						24199196						23894362		21954065	21876530	23940775		20041165	22427811	24040429		23951309
8882859	PMC2229323	PLoS One	1996	22216087						19627616		23077553		21311774		22447856						24265725						23991222		22130448	21876739	24204622		20049711	22451731	24069320		23977160
8882862	PMC2229317	PLoS One	1996	22235247						19627619		23078969		21314332		22460762						24564886						24465746		22179976	21882344	24416370		20069051	22451732	24086542		23991083
8909554	PMC2121061	PLoS One	1996	22238605						19656388		23093861		21324136		22470484						24307564						24520391		22238689	21899735	25077483		20368812	22479178	24098456		24040152
8912527	PMC2074780	PLoS One	1996	22238670						19657370		23102107		21358676		22474415						24457046						24595452		22248049	21906401	25101306		19684311	22479181	24106515		24045639
8920855	PMC2192860	PLoS One	1996	22242191						19671184		23111059		21364973		22475818						24743582						24719563		22253829	21957448	22666471		20011066	22479635	24115583		24058536
8920861	PMC2192857	PLoS One	1996	22245782						19673534		23112819		21390212		22492526						25012362						24821909		22257369	21966373	22734047		20049326	22493704	24155939		24058538
8920864	PMC2192900	PLoS One	1996	22247758						19680549		23117593		21423204		22496773						23139820						24876671		22269349	21979052	23028861		20052269	22496802	24164705		24064796
8920866	PMC2192859	PLoS One	1996	22253816						19685146		23118721		21441929		22509386						23496860						25315906		22279584	21980482	23672668		20052418	22496920	24179562		24068916
8920870	PMC2192871	PLoS One	1996	22253891						19701453		23118725		21463519		22514596						24390633						21714902		22292010	21995845	23840307		20070893	22506022	24209388		24069337
8920873	PMC2192903	PLoS One	1996	22272240						19730731		23118901		21464922		22514744						21663677						22567156		22315091	22003386	23935822		20071504	22535377	24267791		24143212
8920881	PMC2192876	PLoS One	1996	22272319						19732414		23123616		21468687		22522619						22384017						24015822		22319620	22008183	24205293		20082709	22550631	24319531		24146869
8920882	PMC2192888	PLoS One	1996	22272340						19735549		23170088		21494432		22522620						22472882						24289479		22347510	22022446	24244457		20090901	22553482	24367713		24147040
8920883	PMC2192884	PLoS One	1996	22275087						19737405		23175106		21504907		22537941						22751903						24908187		22351600	22028789	24324591		20104254	22558320	24369533		24204622
8920884	PMC2192883	PLoS One	1996	22276189						19754973		23176143		21513518		22547652						22843615						15743533		22356806	22029574	24454471		20111723	22563475	24376710		24257155
8920894	PMC2192892	PLoS One	1996	22287576						19787069		23209640		21552324		22548048						22929882						19052651		22362175	22029666	24463292		20122285	22583915	23929707		24313934
8920897	PMC2192862	PLoS One	1996	22291096						19804631		23226334		21573126		22558306						23076771						19592568		22363796	22039527	25213090		20123722	22615570	24456653		24358269
8922394	PMC2133380	PLoS One	1996	22291910						19814783		23226526		21612665		22566533						23516616						20442854		22369693	22047141	21552537		20138044	22615863	24456815		24129165
8923269	PMC2229350	PLoS One	1996	22291917						19823681		23231648		21625214		22586489						23627488						20485263		22388933	22067412	21549006		20161736	22615983	24463623		24378591
8930547	PMC1469494	PLoS One	1996	22319452						19826426		23232667		21735458		22586590						23874680						21203502		22395529	22140471	21533146		20161790	22626451	24466286		24416370
8947561	PMC2121079	PLoS One	1996	22327962						19829707		23236487		21774828		22596053						24096601						21248698		22397316	22174738	21455316		20169081	22642811	24489798		24443543
8976169	PMC2196372	PLoS One	1996	22337127						19829710		23250422		21779166		22596054						24101869						21305033		22425995	22174871	21447193		20169203	22647789	24509810		24447605
8976181	PMC2196383	PLoS One	1996	22347376						19841737		23270473		21781289		22606220						24581171						21347255		22442732	22174927	21445271		20174568	22662179	24569063		24465207
8976181	PMC2196383	PLoS One	1996	22347385						19844236		23284678		21799785		22615750						24595136						21372780		22447154	22204304	21445238		20174621	22675567	24609135		24498105
8976182	PMC2196394	PLoS One	1996	22355248						19855844		23285296		21812995		22615880						24669276						21562078		22466291	22206005	21435199		20174628	22679519	24736406		24587249
8976182	PMC2196394	PLoS One	1996	22375564						19861961		23300782		21831286		22645604						24683044						21569241		22475209	22170863	21427130		20186321	22713837	24772428		24637903
8976191	PMC2196376	PLoS One	1996	22392450						19888321		23346016		21846369		22649557						24885518						21878944		22509403	22253929	21412276		20208997	22722865	24850958		24667706
8976191	PMC2196376	PLoS One	1996	22396765						19888452		22402322		21853126		22662207						25030093						21949858		22514711	22258561	21385380		20226037	22723962	24927796		24699793
8976192	PMC2196366	PLoS One	1996	22418978						19907659		22466618		21853140		22698914						25114529						21997041		22524543	22267161	21345237		20350372	22737068	24962241		24705197
8976192	PMC2196366	PLoS One	1996	22428044						19924240		22875335		21897855		22698922						22929887						22037736		22558216	22279084	21331663		20350393	22745690	25047452		24747744
8976195	PMC2196382	PLoS One	1996	22428064						19924301		22982628		21901135		22701643						23517578						22132159		22569191	22289655	21326233		20356392	22761734	25112504		24949479
8976195	PMC2196382	PLoS One	1996	22438954						19924303		23076771		21912705		22708778						21699731						22152337		22590551	22290451	21314332		20360176	22792355			24959425
8976197	PMC2196398	PLoS One	1996	22448249						19930549		23202800		21943279		22719219						21808874						22164282		22606355	22292022	21283659		20368974	22792357			24968349
8976197	PMC2196398	PLoS One	1996	22451716						19936220		23326556		21949730		22740171						21834963						22194810		22624500	22300668	21272373		20370919	22802978			25029920
8976198	PMC2196379	PLoS One	1996	22454476						19936259		23327547		21991388		22745325						21859454						22235247		22632257	22325008	21262862		20376322	22808132			25077483
8976198	PMC2196379	PLoS One	1996	22465693						19951433		23328228		22028901		22751694						22022511						22272319		22640474	22348087	21234330		20403155	22808250			25077616
8991087	PMC2133937	PLoS One	1996	22474431						19956597		23347638		22066019		22773667						22194995						22291910		22645112	22348142	21223590		20404914	22808254			25077759
9005249	PMC2196381	PLoS One	1996	22479479						19956606		23407024		22087314		22785174						22277639						22479592		22662127	22355774	21149547		20405007	22823934			25101306
9064323	PMC2192771	PLoS One	1996	22479592						19956682		23409104		22143885		22792290						22485175						22619500		22666365	22394266	21120444		20410313	22826298			17926094
9064326	PMC2192796	PLoS One	1996	22490613						19956719		23414068		22163033		22807033						22491425						22848850		22679369	22403720	21047530		20416260	22844426			20046879
9064329	PMC2192785	PLoS One	1996	22493744						19956728		23418494		22176647		22848482						22616919						23176072		22689910	22438874	20976258		20419133	22844473			20107604
9064331	PMC2192794	PLoS One	1996	22507957						20003387		23423247		22249030		22851574						22929213						23301011		22692539	22438926	20963507		20422019	22844476			21171966
9064334	PMC2192804	PLoS One	1996	22509302						20011522		23432760		21685943		22858798						23118918						23408937		22695044	22438980	20439316		20428250	22844481			21779166
9064343	PMC2192791	PLoS One	1996	22514734						20015407		23437388		21725368		22860063						23104432						23409038		22703519	22470569	21368881		20436920	22848791			21943279
9064345	PMC2192772	PLoS One	1996	22527284						20020049		23441611		21765465		22866906						23579947						23444240		22716658	22491959	21187970		20442858	22860150			22028901
9118890	PMC1469724	PLoS One	1996	22536373						20027305		23454836		21785465		22867128						24002607						23519030		22745655	22511962	21179200		20442871	22866923			22087314
9118892	PMC1469766	PLoS One	1996	22536426						20027308		23454868		21996748		22894755						24066086						23844065		22792360	22533376	21171973		20453872	22870337			22239913
9118902	PMC1469738	PLoS One	1996	22558236						20046869		23460847		22011905		22900035						24107379						23940734		22815746	22534020	21170307		20454613	22876751			23131872
9118905	PMC1469735	PLoS One	1996	22558252						20046875		23471001		22146521		22911868						24143199						23951185		22815812	22536393	21124890		20462412	22879974			23626802
9118916	PMC1469730	PLoS One	1996	22558265						20046879		23471917		22226043		22922341						24278473						24069197		22829961	22536412	21116635		20463893	22879984			23690930
8996253	PMC2196098	PLoS One	1997	22563064						20046882		23503473		22228755		22933110						24401838						24086572		22837815	22549942	21110029		20479118	22880074			23866257
8996253	PMC2196098	PLoS One	1997	22563222						20057943		23516616		22235331		22933112						24520351						24236179		22848851	22558300	21103384		20498839	22889153			24100939
9008713	PMC2132455	PLoS One	1997	22567156						19593566		23520486		22238064		22936178						24599172						24261472		22860058	22558322	21103348		20498840	22897969			23334328
9008713	PMC2132455	PLoS One	1997	22574107						19713997		23530816		22239913		22953001						24674692						24261709		22876142	22564895	21102999		20500892	22913428			24652769
9010021	PMC2063281	PLoS One	1997	22589248						19834493		23542634		22253802		22973538						24743153						24347404		22876937	22590645	21085708		20502682	22928057			24828543
9015315	PMC2134813	PLoS One	1997	22606234						19881541		23548101		22264274		23000581						24857924						24434515		22889165	22627164	20979661		20505762	22952678			18177500
9015315	PMC2134813	PLoS One	1997	22606237						19966866		23552524		22275470		23000933						25000529						24616379		22903887	22629359	20930939		20505822	22952892			18186934
9016870	PMC2196125	PLoS One	1997	22606357						20007298		23555747		22279083		23027613						25093718						24637518		22912741	22678059	20927333		20509957	22952980			22022578
9016870	PMC2196125	PLoS One	1997	22619500						20049321		23590467		22327365		23028558						25118887						24713818		22912838	22715999	20886088		20515488	22970147			22275865
9016872	PMC2196116	PLoS One	1997	22622501						20053283		23593291		22348067		23028588						21587159						25028667		22912851	22730000	20886071		20518032	22973560			22536156
9016872	PMC2196116	PLoS One	1997	22662117						20062078		23593347		22348342		23071669						21595935						25038795		22937957	22748015	20858271		20522497	23000585			23183846
9016880	PMC2196118	PLoS One	1997	22664958						20062804		23618526		22362363		23091343						21655295						25108425		22941283	22750530	20856896		20523738	23027614			23975431
9016880	PMC2196118	PLoS One	1997	22666483						20065066		23619564		22408137		23093064						21702963						11178107		22961549	22761934	20842126		20540780	23028722			23985023
9016881	PMC2196114	PLoS One	1997	22690119						20066051		23620665		22418445		23093868						21746810						11257121		22984623	22802922	20826782		20540783	23029425			24587336
9016881	PMC2196114	PLoS One	1997	22691943						20067635		23627488		22438824		23094067						21756372						11257138		23028754	22808211	20730033		20544012	23071253			23451182
9024699	PMC2134294	PLoS One	1997	22693452						20072624		23628473		22438825		23118741						21772663						11266447		23028819	22815977	20711468		20545846	23071439			11801184
9024699	PMC2134294	PLoS One	1997	22695329						20090907		23650499		22447450		23133617						21829592						11535635		23028832	22914087	20676377		20546698	23071620			12141960
9034138	PMC2196136	PLoS One	1997	22701627						20090918		23663506		22461904		23133675						21831323						11581289		23029379	22916173	20661276		20573188	23077483			15090077
9034138	PMC2196136	PLoS One	1997	22709928						20092659		23668310		22514210		23137106						21850273						11748281		23029491	22927947	20659958		20591166	23101660			15263030
9034144	PMC2196144	PLoS One	1997	22723908						20107508		23671696		22530952		23139632						21851604						12018775		23049975	22952778	20638882		20596532	23107128			16122396
9034144	PMC2196144	PLoS One	1997	22736097						20107604		23672582		22531600		23145054						21915293						11781361		23071606	22952933	20628647		20616187	23107170			16518469
9034145	PMC2196143	PLoS One	1997	22737215						20111698		23691100		22536942		23155382						21926978						11914135		23071621	22963123	20628639		20618960	23110112			16725047
9034145	PMC2196143	PLoS One	1997	22773948						20126537		23710635		22563073		23155466						21933390						12093873		23071727	23028733	20625432		20625428	23119083			16911800
9034146	PMC2196152	PLoS One	1997	22792197						20140201		23755243		22592113		23173044						21935418						12446740		23082856	23029133	20531304		20630105	23133489			17069661
9034149	PMC2196153	PLoS One	1997	22802950						20146790		23758186		22606359		23226259						21951864						12515823		23087045	23029339	20453081		20630110	23133523			17118203
9034153	PMC2196150	PLoS One	1997	22808256						20149229		23762272		22654675		23226280						21970554						12642616		23091362	23033162	20433698		20653947	23142821			17517966
9034153	PMC2196150	PLoS One	1997	22812644						20150368		23762458		22666336		23226517						21998664						12720572		23110504	23056194	20428246		20657653	23144752			17552104
9034157	PMC2196146	PLoS One	1997	22815962						20158915		23767896		22672897		23227273						22025304						12732654		23139842	23056565	20409326		20657826	23144845			17578575
9043020	PMC2063351	PLoS One	1997	22825686						20161707		23776708		22677907		23251339						22054012						12735796		23150788	23071596	20409077		20661301	23151408			17581756
9043021	PMC2063329	PLoS One	1997	22829869						20167811		23777514		22701659		23251685						22072972						12925704		23185565	23082150	20398244		20667098	23166492			17922570
9049243	PMC2132493	PLoS One	1997	22848534						20169192		23800091		22708734		23285083						22103391						15152985		23209315	23119095	20383336		20668534	23166721			17925880
9049243	PMC2132493	PLoS One	1997	22848568						20170548		23812004		22745659		23316315						22122896						14728723		23226497	23144617	20360842		20673363	23166823			17937810
9049252	PMC2132496	PLoS One	1997	22848576						20174572		23818762		22761662		22933107						22126332						15067019		23227269	23166506	20339553		20686694	23181694			18036255
9049252	PMC2132496	PLoS One	1997	22848850						20174581		23840665		22763451		22950702						22163019						15134587		23231953	23172351	20339550		20706595	23185614			18062806
9049253	PMC2132499	PLoS One	1997	22849299						20181281		23841051		22801546		22961084						22194859						15148307		23236515	23192105	20339537		20711524	23189195			18193944
9049253	PMC2132499	PLoS One	1997	22853195						20195545		23842450		22815940		23069626						21649560						15226307		23251331	23209425	20300527		20722077	23209417			18215283
9053444	PMC2196024	PLoS One	1997	22867428						20205934		23874680		22825326		23099863						22134539						15263029		23254291	23209637	20209123		20727202	23209841			18270590
9053444	PMC2196024	PLoS One	1997	22870253						20205946		23887603		22829980		23139348						22200784						15320950		22773755	23249743	20195375		20808947	23226456			18365019
9053447	PMC2196028	PLoS One	1997	22870288						20209053		23887633		22844244		23139354						22238655						15473914		23118341	23284626	20163734		20815884	23226464			18446227
9053447	PMC2196028	PLoS One	1997	22870323						20209087		23901316		22857000		23172920						22257498						15492041		23175609	23284644	20132318		20830204	23236281			18545662
9053450	PMC2196040	PLoS One	1997	22872161						20209107		23922634		22870269		23188390						22272324						15596525		23184605	22846639	20098685		20831818	23237504			18628745
9053450	PMC2196040	PLoS One	1997	22876297						20214787		23930205		22870330		23274897						22292924						15657392		23188827	22864020	20098622		20836893	23253140			18648508
9060470	PMC2132472	PLoS One	1997	22891211						20214788		23935247		22876303		23274909						22299046						15676071		23289709	22864021	20062078		20843337	23270301			18703526
9062406	PMC2063395	PLoS One	1997	22911746						20298593		23955042		22878175		23301060						22300483						15710042		23308226	22959727	20049331		20843364	23271968			18802469
9074887	PMC1469855	PLoS One	1997	22912719						20305819		23967178		22880004		23325078						22363622						15826318		23359803	23065636	19823761		20844587	23272112			18816375
9083333	PMC2222749	PLoS One	1997	22912742						20334655		24015932		22888250		23326594						22388091						15876356		23380860	23087021	19809474		20844758	23272237			18922185
9083334	PMC2222733	PLoS One	1997	22912870						20346151		24019914		22931209		23349910						22427841						15911875		23388701	23180777	19795140		20860795	23272262			19018284
9083337	PMC2222752	PLoS One	1997	22915766						20350328		24034496		22935085		23364452						22427935						16011810		23405058	23250356	19506559		20861860	23284865			19036130
9087448	PMC2132507	PLoS One	1997	22923475						20351690		24040358		22937084		23364683						22461453						16050778		23405115	23264561	19298598		20886087	23284939			19055736
9087448	PMC2132507	PLoS One	1997	22928080						20352126		24040362		22952764		23372751						22470441						16109169		23409868	23276394	20157512		20941361	23285063			19178704
9089444	PMC2217069	PLoS One	1997	22932118						20356394		24058525		22952779		23372814						22475739						16111501		23424202	23320088	20011099		20949022	23285237			19266027
9089444	PMC2217069	PLoS One	1997	22936985						20360964		24069171		22952867		23383062						22479306						16159402		23451282	23326597	19997493		20949077	23300439			19371445
9091575	PMC2196246	PLoS One	1997	22952736						20360989		24073414		22973541		23393605						22500123						16172261		23470541	23335206	19956633		20958976	23300550			19424499
9091585	PMC2196231	PLoS One	1997	22977222						20361267		24079479		22984515		23405091						22520446						16220146		23489026	23349361	19936237		20967263	23300932			19543379
9091585	PMC2196231	PLoS One	1997	22981861						20376206		24096601		23028537		23406154						22529526						16250670		23503602	23349684	19936202		21048957	22692455			19578403
9104808	PMC2196269	PLoS One	1997	22984613						20376308		24098593		23029098		23418596						22563306						16260491		23505062	23349715	19924302		21060798	23168836			19578432
9104810	PMC2196266	PLoS One	1997	23018345						20376343		24101869		23029485		23423564						22563471						16280085		23520469	23349722	19917141		21067563	23254286			19649318
9104810	PMC2196266	PLoS One	1997	23024758						20379368		24124051		23077548		23432808						22587610						16288566		23531041	23349894	19893633		21072237	23301074			19650917
9104811	PMC2196250	PLoS One	1997	23028616						20390104		24152862		23077666		23437106						22606349						16361819		23531149	23374228	19806224		21079759	23326232			19703109
9104822	PMC2196264	PLoS One	1997	23028668						20405005		24166280		23077727		23437231						22615967						16412244		23543914	23379588	19783846		21085469	23334235			19710944
9104822	PMC2196264	PLoS One	1997	23028736						20405019		24176855		23119079		23442068						22643035						16478293		23554921	23390510	19759851		21092162	23337382			19841748
9105040	PMC2139869	PLoS One	1997	23028874						20406497		24204943		23131872		23451276						22654599						16478543		23560952	23409176	19756142		21098096	23349889			19684311
9105040	PMC2139869	PLoS One	1997	23029168						20419092		24219565		23151305		23457508						22666475						16503978		23565247	23418536	19710035		21103366	23383021			20169203
9114306	PMC1470255	PLoS One	1997	23029514						20419128		24250827		23164239		23469233						22684844						16522209		23573275	23421753	19643015		21122144	23383295			20174621
9114308	PMC1470316	PLoS One	1997	23049867						20419170		24268070		23166633		23482445						22685374						16681857		23620781	23448240	19640925		21124875	23386437			20350372
9114370	PMC1470213	PLoS One	1997	23050732						20420708		24278200		23173060		23483929						22701742						16700923		23631660	23457544	19593442		21124895	23387852			20356392
9114371	PMC1470221	PLoS One	1997	23056479						20421925		24278292		23185521		23494125						22718263						16836832		23637888	23489322	19578180		21124899	23424637			20360176
9120394	PMC2196175	PLoS One	1997	23090637						20421983		24279335		23216862		23506302						22745831						16842619		23637912	23514826	19565184		21124900	23437409			20404914
9120399	PMC2196165	PLoS One	1997	23095212						20422010		24279644		23226219		23524568						22788748						16891822		23638043	23560889	19557186		21139679	23441208			20410313
9120399	PMC2196165	PLoS One	1997	23099254						20426873		24324975		23226501		23533683						22802943						16893448		23642031	23565077	19547991		21159170	23453057			20416260
9126927	PMC2196278	PLoS One	1997	23110048						20429921		24330823		23234329		23536174						22815744						17018142		23650566	23565179	19547756		21171973	23467583			20419133
9126927	PMC2196278	PLoS One	1997	23110058						20429939		24339963		23251384		23547923						22815821						17052333		23658612	23580201	19517018		21172007	23497610			20422019
9126932	PMC2196279	PLoS One	1997	23118941						20433698		24351817		23251462		23549462						22848503						17067377		23659495	23590629	19513788		21179419	23505411			20454613
9126932	PMC2196279	PLoS One	1997	23119000						20435547		24376772		23275880		23552019						22849659						17107623		23667480	23593159	19503072		21203568	23516649			20463893
9126934	PMC2196276	PLoS One	1997	23125528						20436918		24376895		23304254		23554993						22852058						17147801		23671652	23643691	19498036		21203588	23517052			20545846
9126934	PMC2196276	PLoS One	1997	23133551						20438640		24386456		22287596		23554999						22870297						17183681		23681668	23667691	19492057		21252450	23521724			20630110
9151700	PMC2196318	PLoS One	1997	23133676						20439541		24067278		22370636		23555752						22912805						17187680		23686791	23690968	19480703		20922456	23527208			20686694
9151708	PMC2196310	PLoS One	1997	23139633						20440269		24129822		22733137		23563382						22937152						17192191		23691153	23691195	19436705		20923452	23536867			20808947
9151708	PMC2196310	PLoS One	1997	23143639						20442768		24297248		23065639		23585733						22947064						17158949		23700454	23691255	19369296		21183481	23555255			20836893
9151713	PMC2196325	PLoS One	1997	23143987						20442771		24382758		23118343		23589759						22987325						17218254		23710445	23755160	19363478		21205330	23555725			20843364
9151713	PMC2196325	PLoS One	1997	23144743						20442777		24384612		23143107		23597066						23028636						17220887		23734278	23755187	19331679		21208931	23555767			20844758
9151890	PMC2196291	PLoS One	1997	23144791						20445751		24403176		23297316		23637966						23028652						17250763		23737982	23805379	19236710		21249199	23565274			20860795
9151890	PMC2196291	PLoS One	1997	23145072						20453081		24413802		23299801		23640454						23028952						17296794		23740718	23851663	19223390		21251256	23570545			20949077
9166409	PMC2136216	PLoS One	1997	23149447						20454501		24416140		23308230		23641944						23029241						17326148		23741377	23870245	19218199		21251300	23577057			21067563
9166409	PMC2136216	PLoS One	1997	23152932						20454618		24423923		23372655		23646149						23029340						17326724		23755170	23875003	19214206		21255440	23577080			21072237
9166419	PMC2196335	PLoS One	1997	23166589						20454619		24457958		23380875		23649519						23043753						17338819		23762378	23877404	19196476		21256128	23579784			21085469
9166425	PMC2196337	PLoS One	1997	23166663						20454651		24465768		23382905		23656888						23140447						17389931		23762454	23880880	19172181		21264301	23592983			21098096
9166426	PMC2196341	PLoS One	1997	23166825						20473309		24466321		23385731		23656889						23151036						17437647		23785461	23903682	19172175		21264351	23593002			21171973
9166934	PMC2223510	PLoS One	1997	23176072						20487542		24520385		23404288		23672639						23185540						17474994		23792494	23914984	19116647		21276251	23593251			21172007
9166935	PMC2223489	PLoS One	1997	23185548						20494973		24528602		23408899		23691192						23189147						17522092		23798567	23922229	18989361		21283804	23593453			21252450
9170018	PMC3054248	PLoS One	1997	23209191						20498710		24555445		23418460		23700406						23209347						17531092		23798570	23922741	18957104		21304986	23612313			21255440
9174859	PMC2423855	PLoS One	1997	23209546						20504328		24555849		23426136		23704916						23285141						17535104		23805920	23924318	18842625		21310755	23620814			21283804
9182675	PMC2196346	PLoS One	1997	23209718						20520761		24577582		23435420		23704946						23054079						17584923		23846963	23936129	18769714		21345237	23637827			21345237
9182675	PMC2196346	PLoS One	1997	23212367						20520772		24581171		23437297		23710468						23169007						17587455		23873129	23936174	18700006		21347238	23642259			21371335
9182679	PMC2196358	PLoS One	1997	23216643						20523727		24583651		23468991		23715298						23223614						17590087		23874687	23936403	18671875		21347299	23646181			21407806
9182681	PMC2196359	PLoS One	1997	23226300						20525249		24586805		23497166		23715621						23326368						17619227		23894578	23968752	18648646		21347313	23653448			21435230
9182682	PMC2196349	PLoS One	1997	23226938						20531296		24587106		23505444		23717413						23326543						17623103		23900282	23976996	18648492		21364878	23656976			21464955
9182682	PMC2196349	PLoS One	1997	23230000						20531304		24594904		23516545		23717456						23331548						17626629		23912553	23977020	18510752		21371335	23658634			21520180
9182686	PMC2196351	PLoS One	1997	23232669						20535211		24595136		23536778		23719562						23341783						17645799		23924076	23977274	18489762		21375734	23658662			21533108
9182686	PMC2196351	PLoS One	1997	23233788						20539819		24615175		23544127		23729657						23349887						17650315		23935126	24008733	18424447		21379340	23660989			21544194
9182687	PMC2196355	PLoS One	1997	23236507						20543982		24647439		23555653		23742173						23360775						17664291		23935936	24009748	18412970		21385425	23671716			21602908
9182687	PMC2196355	PLoS One	1997	23243415						20565783		24669276		23555837		23755196						23383288						17677002		23936214	24023695	18371231		21388530	23675429			21629785
9184176	PMC2223546	PLoS One	1997	23251082						20565978		24678763		23565227		23755289						23393567						17683523		23936499	24040091	18328704		21390155	23675482			21698182
9199175	PMC2137829	PLoS One	1997	23251343						20573279		24681606		23589626		23762879						23416838						17686156		23943375	24058586	18320030		21390325	23675550			21731692
9199175	PMC2137829	PLoS One	1997	23251382						20574516		24683044		23593223		23764993						23431240						17712422		23951061	24058604	18315872		21392042	23696894			21738791
9206995	PMC2198958	PLoS One	1997	23251498						20585401		24684778		23608756		23770987						23431396						17784957		23951225	24069328	18062806		21407806	23698100			21811575
9206995	PMC2198958	PLoS One	1997	23255322						20585617		24694877		23613996		23776696						23437332						17785520		23977226	24069439	17785520		21412420	23700470			21813860
9206997	PMC2198961	PLoS One	1997	23272265						20587035		24714917		23620793		23818985						23437361						17900358		23983587	24086745	17712422		21423646	23723978			21819550
9206997	PMC2198961	PLoS One	1997	23281647						20592929		24722367		23626802		23823477						23448134						17922909		23990976	24109434	17677002		21423750	23734932			21819560
9207007	PMC2198969	PLoS One	1997	23284805						20613874		24782648		23665297		23825921						23449983						17925863		24011127	24143194	17664291		21423798	23735014			21915277
9207007	PMC2198969	PLoS One	1997	23285142						20614008		24788789		23675307		23826229						23451048						17927447		24014913	24204848	17645799		21435229	23741368			21931845
9214390	PMC2139936	PLoS One	1997	23288947						20615237		24806510		23690930		23826335						23451061						17938734		24023774	24205258	17626629		21435230	23741420			21931850
9214390	PMC2139936	PLoS One	1997	23300650						20615255		24824754		23691006		23828045						23457522						17967183		24025218	24223856	17619227		21439032	23742026			21966468
9221757	PMC2198979	PLoS One	1997	23300697						20630075		24846270		23691228		23835340						23460857						18021406		24040390	24223940	17590087		21439091	23762234			22028653
9221759	PMC2198973	PLoS One	1997	23300926						20657647		24853369		23693134		23835344						23505426						18030339		24056696	24223980	17584923		21445321	23762356			22050764
9222898	PMC2217045	PLoS One	1997	23301011						20663219		24853419		23717650		23852084						23515704						18086918		24069173	24224996	17531092		21461275	23784148			22069490
9222899	PMC2217037	PLoS One	1997	23301086						20664705		24858487		23737943		23874589						23533300						18258040		24069174	24236177	17522092		21464955	23785507			22073120
9222899	PMC2217037	PLoS One	1997	23308255						20676139		24860830		23741457		23884884						23555007						18059472		24069332	24244454	17437647		21481258	23785538			22096530
9230086	PMC2138185	PLoS One	1997	23316291						20678220		24884715		23784081		23884888						23649820						18183299		24086523	24244517	17389931		21483851	23816343			22216095
9230086	PMC2138185	PLoS One	1997	23316322						20686609		24885518		23799088		23894487						23667439						18197975		24086650	24252211	17326724		21518429	23820163			22214421
9236187	PMC2199002	PLoS One	1997	23320130						20691066		24893165		23805780		23897951						23667616						18227221		24098472	24252227	17326148		21520180	23820392			22235288
9236187	PMC2199002	PLoS One	1997	23324314						20698985		24916956		23806234		23917725						23667681						18250199		24113175	24252411	17250763		21525801	23820393			22278669
9236188	PMC2199001	PLoS One	1997	23334241						20700459		24920908		23820165		23922490						23671638						18270596		24116126	24278307	17218254		21525979	23822604			22363561
9236188	PMC2199001	PLoS One	1997	23349479						20700533		24938229		23835587		23922494						23680060						18286173		24124461	24282339	17187680		21526210	23826346			22363747
9236190	PMC2198999	PLoS One	1997	23349943						20706286		24950740		23861320		23922871						23691511						18315872		24124525	24303073	17147801		21526217	23840854			22384161
9236197	PMC2198995	PLoS One	1997	23355886						20716929		24950741		23866257		23936866						23710463						18316356		24124567	24313976	16891822		21529366	23864739			22389675
9236197	PMC2198995	PLoS One	1997	23356671						20723242		24958442		23889939		23942551						23724032						18320030		24139484	24324407	16700923		21533108	23874584			22438920
9236206	PMC2233789	PLoS One	1997	23374104						20727157		24963216		23899160		23950917						23757602						18328704		24141843	24344647	16524466		21533168	23874808			22439739
9236206	PMC2233789	PLoS One	1997	23383212						20729872		24979756		23919516		23957015						23799102						18334965		24170981	24349357	16522209		21544194	23874957			22451728
9252202	PMC2224052	PLoS One	1997	23383297						20730114		24986896		23936028		23977216						23815813						18353190		24171758	24376837	16280085		21549019	23890251			22451741
9252203	PMC2224059	PLoS One	1997	23383329						20731828		24997609		23936173		23977269						23926350						18362179		24175087	23908553	16260491		21554724	23900173			22496825
9254653	PMC2199027	PLoS One	1997	23387955						20735817		25004451		23936238		23984430						23936505						18371231		24205011	24039209	16159402		21575169	23902681			22523585
9254656	PMC2199033	PLoS One	1997	23408937						20796309		25023195		23945586		24009454						23936781						18380890		24205018	24316510	16105171		21589883	23902802			22546040
9254659	PMC2199040	PLoS One	1997	23409038						20808919		25030093		23951254		24009755						23940606						18400101		24223757	24341874	16011810		21602908	23903655			22617141
9254659	PMC2199040	PLoS One	1997	23409043						20810787		25033273		23967156		24043756						23967339						18412970		24223972	24363064	15876356		21603208	23903978			22640559
9271584	PMC2199020	PLoS One	1997	23418594						20814571		25077564		24023893		24045836						24010817						18423014		24244296	24423792	15826318		21615956	23903987			22647790
9271584	PMC2199020	PLoS One	1997	23425860						20838603		25079962		24039861		24057002						24040034						18424447		24260176	24428919	15676071		21615971	23936115			22672588
9271586	PMC2199024	PLoS One	1997	23437099						20842125		25100208		24040160		24086307						24040409						18461171		24312227	24480485	15596525		21623605	23936347			22691411
9271586	PMC2199024	PLoS One	1997	23437105						20842126		25114527		24040339		24086519						24044676						18463734		24336078	24496176	15226307		21628500	23937079			22693450
9271592	PMC2199014	PLoS One	1997	23437254						20843370		25114529		24046360		24098551						24046361						18467364		24349043	24499735	15148307		21629771	23940775			22716772
9271593	PMC2199010	PLoS One	1997	23437401						20856939		25266877		24069385		24126953						24058452						18478109		24349101	24531797	14676814		21629785	23951007			22720036
9275021	PMC2227997	PLoS One	1997	23444240						20862307		24903055		24080367		24146535						24069341						18489762		24364862	24577121	12735796		21649904	23951309			22723917
9281578	PMC2136769	PLoS One	1997	23451182						20877462		24131623		24085151		24146886						24073252						18489773		24376810	24577234	12515823		21654804	23951382			22768116
9281578	PMC2136769	PLoS One	1997	23451234						20885960		24504138		24100939		24147174						24098933						18495020		24386444	24586653	12460454		21655107	23967119			22768236
9288627	PMC3054206	PLoS One	1997	23457456						20885974		19575006		24124460		24172214						24138138						18510752		24392452	24586776	12446740		21672221	23972034			22792298
9294142	PMC2199048	PLoS One	1997	23460527						20923560		21767374		24127404		24188631						24142648						18522748		24453891	24587312	11178107		21673796	23977065			22808253
9294142	PMC2199048	PLoS One	1997	23463770						20926645		23610522		24133573		24194903						24155658						18558011		24455732	24642514	23409038		21673955	23977160			22815957
9294143	PMC2199053	PLoS One	1997	23466994						20932318		24204892		24143253		24205242						24204651						18575605		24456799	24655927	24886907		21687549	23977248			22848506
9294143	PMC2199053	PLoS One	1997	23467882						20937705		24223204		24148528		24236037						24204674						18575617		24009314	24663062	24529306		21687676	23982068			22857743
9294722	PMC1470109	PLoS One	1997	23469284						20942901		24397824		24188284		24236066						24204804						18590543		24225640	24682784	24465508		21695116	23984396			22882874
9298983	PMC2132546	PLoS One	1997	23469285						20946663		12618887		24199196		24236159						24204926						18648492		24270802	24686787	24098534		21695169	23991083			22911850
9303359	PMC2228019	PLoS One	1997	23470715						20956380				24204315		24244369						24223895						18648532		24326964	24728353	23957944		21695193	23991203			22949746
9310232	PMC2228026	PLoS One	1997	23471419						20967026				24204690		24252636						24224014						18648643		24335844	24732467	23853091		21695273	24023870			22970191
9314532	PMC2139819	PLoS One	1997	23472096						20969807				24223168		24260158						24236172						18648646		24356899	24764192	23463770		21698140	24034228			23009705
9314549	PMC2199062	PLoS One	1997	23472157						20976136				24244446		24308370						24244404						18671875		24405628	24778885	23451234		21698150	24040152			23056268
9314549	PMC2199062	PLoS One	1997	23472207						20979661				24260246		24319678						24256698						18673548		24405637	24796537	23149447		21698182	24045639			23077564
9314550	PMC2199059	PLoS One	1997	23505495						21042580				24265725		24324833						24285922						18698410		24448491	24886239	22911746		21701593	24053449			23082164
9314550	PMC2199059	PLoS One	1997	23509745						21047425				24287699		24378208						24300094						18700006		24466346	24890391	22238670		21708931	24058536			23091640
9314562	PMC2199076	PLoS One	1997	23519030						21048967				24287723		24386218						24312428						18716656		24469566	24907493	22046433		21709627	24058538			23133514
9314562	PMC2199076	PLoS One	1997	23519150						21048983				24312199		24391749						24330719						18769714		24469912	24918775	22031820		21720503	24058595			23153050
9334355	PMC2139797	PLoS One	1997	23525196						21049054				24334679		24391760						24347826						18773080		24475300	25032964	22028848		21731428	24064796			23153119
9334355	PMC2139797	PLoS One	1997	23525427						21050466				24358335		23526686						24349268						18776935		24489866	25050360	22015461		21731484	24066174			23185574
9334356	PMC2139794	PLoS One	1997	23525445						21060663				24376547		23974926						24367540						18803809		24495352	25101296	21779764		21731643	24068916			23193519
9334356	PMC2139794	PLoS One	1997	23531147						21060779				24391453		24009258						24367590						18826595		24498180	25121503	21688176		21731692	24068938			23239972
9334365	PMC2199093	PLoS One	1997	23544146						21079779				24403255		24062246						24367979						18826638		24503961	25133605	21217823		21731762	24069337			23300718
9334375	PMC2199087	PLoS One	1997	23549381						21080971				24564886		24078137						24369446						18828909		24512669	25158693	21128084		21738266	24073293			23301070
9348281	PMC2141717	PLoS One	1997	23555560						21085595				23334328		24088954						24489575						18835867		24517272	25188265	20943418		21738270	24083230			23301078
9348302	PMC2199116	PLoS One	1997	23555672						21085651				23376849		24101677						23875733						18836441		24518227		20704721		21738709	24086456			23308233
9348302	PMC2199116	PLoS One	1997	23555933						21108830				23676439		24150608						24168764						18842625		24521084		20657835		21738791	24090087			23347395
9348310	PMC2199126	PLoS One	1997	23560095						21113097				23851502		24194505						24283976						18847493		24549572		20558441		21738811	24098563			23349783
9348310	PMC2199126	PLoS One	1997	23564080						21124841				23975432		24251534						24295402						18851757		24550686		20202211		21740553	24106222			23437410
9362520	PMC2139972	PLoS One	1997	23564081						21124878				24013229		24326453						24297111						18852886		24551095		20140243		21750671	24106230			23544138
9362520	PMC2139972	PLoS One	1997	23577189						21152437				24286320		24392081						24405692						18854053		24555533		20049698		21750709	24143212			23555939
9362527	PMC2199139	PLoS One	1997	23587270						21164223				24307564		24400109						24429403						18931664		24561315		18410407		21765962	24146869			23577770
9362527	PMC2199139	PLoS One	1997	23589679						21171966				24400073		24411943						24446489						18945333		24569833		18289368		21772664	24147040			23593201
9362534	PMC2199135	PLoS One	1997	23592918						21176239				24407190		24465383						24465497						18955571		24572785		17877807		21775959	24156277			23593362
9362534	PMC2199135	PLoS One	1997	23593329						21203518				24457046		24465611						24465666						18955797		24577081		22693452		21789190	24167594			23611895
9362535	PMC2199145	PLoS One	1997	23593350						21203530				24462734		24466007						24465740						18957104		24586789		23963759		21789196	24180253			23613884
9362535	PMC2199145	PLoS One	1997	23596510						21209895				24465395		24473561						24489937						18974863		24599021		24068938		21789200	24187666			23617550
9362539	PMC2199142	PLoS One	1997	23600527						21210965				24465590		24499025						24495712						18986535		24601592		23237504		21789257	24198843			23658749
9362539	PMC2199142	PLoS One	1997	23608606						21212463				24474198		24511993						24497934						18989361		24605339		23301074		21791037	24204622			23717489
9365163	PMC2228110	PLoS One	1997	23610522						21297223				24520211		24521356						24499286						18990235		24612480		22647790		21799855	24204830			23718711
9365166	PMC2228133	PLoS One	1997	23614016						21307402				24572994		24532508						24505273						19014502		24642694		22848506		21811575	24204962			23736287
9370513	PMC1470341	PLoS One	1997	23614049						21311099				24603706		24533087						24520342						19025592		24655894		23544138		21813005	24236032			23758678
9374377	PMC2228152	PLoS One	1997	23628871						20533064				24652769		24586733						24550603						19046515		24705452		24267638		21813860	24244362			23773211
9376259	PMC2228091	PLoS One	1997	23634975						20577802				24729479		24586865						24584660						19057664		24756152		21725368		21814172	24250805			23785533
9382868	PMC2140209	PLoS One	1997	23637775						20689978				24742286		24594974						24637581						19066529		24760018		22763451		21818288	24257155			23785537
9382868	PMC2140209	PLoS One	1997	23644861						20856202				24742783		24597671						24688224						19116647		24781921		23065639		21818308	24282553			23805945
9382874	PMC2140200	PLoS One	1997	23658642						20960236				24743582		24633252						24695531						18818193		24784230		21593432		21818362	24308795			23825590
9382874	PMC2140200	PLoS One	1997	23658656						20972458				24747802		24651693						24722050						18832330		24802808		21594677		21819550	24313934			23825679
9382875	PMC2140205	PLoS One	1997	23658728						21079960				24752294		24658034						24730756						18843265		24824433		21623382		21819560	24324734			23840852
9382883	PMC2199147	PLoS One	1997	23666461						21151173				24788257		24663217						24731244						18984744		24844281		21625469		21829583	24327787			23860099
9382883	PMC2199147	PLoS One	1997	23675473						21226899				24811761		24667560						24732107						19017726		24858312		21625620		21835036	24327788			23860770
9396756	PMC2132624	PLoS One	1997	23675503						21233857				24827933		24673402						24733017						19039037		24868317		21698260		21843339	24358269			23874826
9396756	PMC2132624	PLoS One	1997	23680658						21241512				24828543		24676425						24744681						19098904		24884473		21731499		21853049	24369005			23895213
9396759	PMC2132623	PLoS One	1997	23700405						21248750				24831228		24705605						24755955						19129917		24885036		21738735		21858123	24369539			23900170
9396759	PMC2132623	PLoS One	1997	23700419						21264222				24884657		24721882						24781156						19133139		24885042		21750683		21860372	24376599			23936104
9396777	PMC2199163	PLoS One	1997	23702879						21269511				24885183		24728138						24782112						19154608		24921942		21827663		21876771	24376637			23936152
9396777	PMC2199163	PLoS One	1997	23705018						21276249				24886204		24741590						24785085						19158948		24923195		21857957		21887316	24376704			23936388
9400702	PMC1470134	PLoS One	1997	23705026						21282721				24923427		24750819						24786090						19171071		24939012		21887366		21896679	24454472			23937452
9400721	PMC1470169	PLoS One	1997	23708689						21283818				24954394		24759928						24885161						19172181		24943008		21897851		21906319	24129165			23940650
9413944	PMC2228216	PLoS One	1997	23709562						21285984				24979267		24764190						24886716						19181682		24957987		21912697		21909450	24136208			23950998
9544492	PMC2589100	PLoS One	1997	23709563						21294856				25012362		24803987						24907978						19196476		24963862		21918544		21915277	24163420			23966857
9587711	PMC2275979	PLoS One	1997	23716398						21294885				25014774		24806840						24913772						19214206		24965042		21953411		21915347	24271778			23980694
9825482	PMC2589263	PLoS One	1997	23717502						21297660				25069779		24823880						24950052						19218199		24968028		21955788		21931831	24373385			24007444
9425170	PMC2132607	PLoS One	1998	23717557						21297973				25110884		24827579						25009783						19221395		24987178		21964919		21931845	24378591			24023720
9432973	PMC2212099	PLoS One	1998	23737953						21304978				25170306		24875130						25022445						19223390		24987179		21978358		21931850	24416370			24023963
9432973	PMC2212099	PLoS One	1998	23741427						21306648				25326065		24886809						25053904						19236710		25017386		21980309		21936899	24443543			24058590
9432977	PMC2212105	PLoS One	1998	23744273						21311773				24646493		24917595						25058417						19240795		25042160		22016787		21943202	24447605			24059458
9432979	PMC2212103	PLoS One	1998	23749231						21311774				17653278		24960177						25092105						19245717		25043939		22022281		21949747	24447898			24066118
9432979	PMC2212103	PLoS One	1998	23750212						21314332				20505761		24987707						25170302						19254928		25079250		22028672		21949840	24460618			24073762
9442117	PMC2132586	PLoS One	1998	23750267						21324136				21204268		24997608						25180025						19277212		25079853		22031297		21966468	24465207			24086725
9442117	PMC2132586	PLoS One	1998	23755169						21338489				21923911		24999476						25287866						19293928		25093460		22035425		21980477	24465641			24088531
9449710	PMC2212117	PLoS One	1998	23759702						21339823				22120709		25013896												19295917		25154628		22039518		21998712	24465734			24116019
9449710	PMC2212117	PLoS One	1998	23762316						21352555				22200760		25074485												19300520		25181483		22046428		22022603	24466045			24188212
9449719	PMC2212121	PLoS One	1998	23774796						21358676						25076419												19326101		25181488		22072968		22028653	24489720			24255126
9449719	PMC2212121	PLoS One	1998	23782924						21364973						25077757												19331679		25189223		22096518		22028930	24496826			24267638
9449725	PMC2212114	PLoS One	1998	23785464						21368561						25077824												19352431		25213836		22145038		22029431	24497916			24324838
9460995	PMC2151221	PLoS One	1998	23800383						21386129						25101835												19352500		25305781		22162136		22046311	24498105			24325943
9463406	PMC2212158	PLoS One	1998	23801661						21390212						25121729												19360426		25315440		22164245		22050764	24498450			24339869
9463410	PMC2212142	PLoS One	1998	23825571						21390238						25142225												19363478				22216111		22053180	24502341			24348248
9463410	PMC2212142	PLoS One	1998	23836162						21394107						25167881												19369296				20644563		22054060	24505447			24349383
9472639	PMC2151290	PLoS One	1998	23840332						21396117																		19379487				21843906		22054420	24509526			24367266
9484826	PMC2149920	PLoS One	1998	23840758						21407213																		19401298				21870131		22059807	24519126			24385907
9490722	PMC2132706	PLoS One	1998	23840920						21408169																		19436705				21935678		22066026	24523886			24391809
9490728	PMC2132699	PLoS One	1998	23844065						21423204																		19478831				21960009		22069490	24558422			23512834
9490728	PMC2132699	PLoS One	1998	23853091						21441929																		19479038				22171071		22069498	24587249			24022847
9500788	PMC2212186	PLoS One	1998	23861876						21445304																		19480703				22178654		22073120	24595157			24413286
9500788	PMC2212186	PLoS One	1998	23870734						21448310																		19484127				22198570		22086488	24597857			24424041
9500796	PMC2212182	PLoS One	1998	23874215						21448340																		19486531				22222029		22096530	24623878			24475243
9500796	PMC2212182	PLoS One	1998	23874490						21463519																		19487416				22248045		22110391	24626410			24498261
9508776	PMC2132680	PLoS One	1998	23874769						21464516																		19492057				22272290		22110673	24632596			24549847
9508776	PMC2132680	PLoS One	1998	23874911						21464922																		19498036				22281016		22114681	24637582			24595353
9508777	PMC2132681	PLoS One	1998	23875706						21464968																		19498425				22287836		22114733	24637903			24651695
9508777	PMC2132681	PLoS One	1998	23877744						21468687																		19500352				22291885		22118493	24651069			24667548
9528829	PMC2150101	PLoS One	1998	23883163						21479220																		19503072				22292003		22132068	24651123			24667642
9529314	PMC2212218	PLoS One	1998	23894348						21479246																		19513788				22292029		22145040	24651711			24670993
9529314	PMC2212218	PLoS One	1998	23894362						21479793																		19515262				22348029		22162746	24666892			24685242
9529315	PMC2212206	PLoS One	1998	23894446						21490965																		19517018				22363539		22162948	24666970			24692633
9529315	PMC2212206	PLoS One	1998	23894614						21494432																		19523444				22384032		22163058	24667237			24694712
9529321	PMC2212199	PLoS One	1998	23894672						21496344																		19538708				22384217		22168579	24667706			24709804
9529321	PMC2212199	PLoS One	1998	23903056						21504907																		19547756				22393392		22194944	24670210			24736397
9529325	PMC2212212	PLoS One	1998	23921644						21504908																		19547991				22393426		22194951	24677194			24740241
9548711	PMC2148459	PLoS One	1998	23929941						21513518																		19551139				22393443		22199109	24699535			24807690
9548711	PMC2148459	PLoS One	1998	23935882						21541292																		19557186				22396656		22205939	24699793			24871580
9548721	PMC2148442	PLoS One	1998	23936171						21552324																		19565184				22412847		22216095	24705197			24902603
9548721	PMC2148442	PLoS One	1998	23936343						21555486																		19571888				22412900		22216115	24717526			24950196
9565636	PMC2212262	PLoS One	1998	23936482						21559085																		19578180				22466687		22216363	24717726			25036370
9565638	PMC2212263	PLoS One	1998	23938286						21559465																		19593442				22472560		22355204	24747744			25111708
9565638	PMC2212263	PLoS One	1998	23940580						21573126																		19602296				22496793		22355213	24887426			25116007
9565640	PMC2212264	PLoS One	1998	23940734						21573168																		19630993				22532851		21617969	24898886			25177550
9565640	PMC2212264	PLoS One	1998	23951185						21602883																		19636355				22537414		22103353	24903089
9565643	PMC2212266	PLoS One	1998	23951359						21605372																		19640278				22540152		22147790	24915459
9565643	PMC2212266	PLoS One	1998	23957394						21611169																		19640925				22558334		22194770	24917594
9565645	PMC2212260	PLoS One	1998	23957944						21611205																		19641486				22563483		22203861	24932583
9565645	PMC2212260	PLoS One	1998	23963753						21612665																		19643015				22606356		22214421	24937303
9566975	PMC2132757	PLoS One	1998	23963755						21625214																		19649300				22609489		22218223	24939647
9566975	PMC2132757	PLoS One	1998	23963759						21627862																		19649303				22644036		22223035	24949479
9584142	PMC2212286	PLoS One	1998	23967137						21633700																		19652708				22646813		22235288	24959425
9585413	PMC2132782	PLoS One	1998	23967310						21637823																		19660138				22647713		22238649	24967215
9585413	PMC2132782	PLoS One	1998	23977256						21647330																		19680561				22654670		22242171	24968349
9599694	PMC1533393	PLoS One	1998	23977363						21660132																		19710035				22676725		22253905	25029920
9606217	PMC2137182	PLoS One	1998	23977364						21663677																		19710907				22693571		22258322	25072031
9606217	PMC2137182	PLoS One	1998	23981339						21672263																		19719848				22697885		22272321	25077483
9607915	PMC2212309	PLoS One	1998	23985377						21673810																		19734909				22701626		22278669	25077616
9607916	PMC2212314	PLoS One	1998	23991222						21698280																		19737145				22723850		22279575	25077758
9607919	PMC2212308	PLoS One	1998	23994834						21699694																		19751582				22723997		22295118	25077759
9607919	PMC2212308	PLoS One	1998	23999067						21699731																		19756142				22745686		22316002	25091724
9607920	PMC2212306	PLoS One	1998	23999526						21711565																		19756182				22773905		22328592	25101306
9607923	PMC2212316	PLoS One	1998	24015822						21712504																		19759851				22792139		22347409	25108672
9607923	PMC2212316	PLoS One	1998	24023842						21725989																		19774080				22815892		22348301	25133400
9607926	PMC2212302	PLoS One	1998	24037190						21731504																		19779609				22848498		22348321	25192845
9607926	PMC2212302	PLoS One	1998	24039788						21731676																		19783846				22863301		22361388	25266106
9625758	PMC2212360	PLoS One	1998	24052074						21731714																		19789628				22870188		22363472
9625758	PMC2212360	PLoS One	1998	24058479						21735458																		19793721				22870339		22363561
9625764	PMC2212357	PLoS One	1998	24063402						21738579																		19794916				22900020		22363747
9625764	PMC2212357	PLoS One	1998	24066149						21755017																		19806224				22900024		22363768
9628886	PMC2132792	PLoS One	1998	24067190						21772266																		19809509				22912745		22363797
9628886	PMC2132792	PLoS One	1998	24069197						21774594																		19865488				22914735		22383953
9635827	PMC2150057	PLoS One	1998	24069457						21774828																		19876403				22915735		22384059
9653089	PMC2525537	PLoS One	1998	24072531						21777437																		19878039				22916201		22384161
9653089	PMC2525537	PLoS One	1998	24073272						21779166																		19893614				22919518		22384242
9653093	PMC2525547	PLoS One	1998	24086273						21779410																		19893633				22922786		22389675
9653093	PMC2525547	PLoS One	1998	24086572						21781289																		19915679				22925892		22393351
9653096	PMC2525553	PLoS One	1998	24086665						21799785																		19917141				22926222		22396790
9667642	PMC2150345	PLoS One	1998	24093778						21808230																		19924302				22927985		22403627
9670035	PMC2212460	PLoS One	1998	24098534						21808874																		19936202				22937132		22407806
9670052	PMC2212457	PLoS One	1998	24098750						21811251																		19956633				22970194		22427811
9687525	PMC2212482	PLoS One	1998	24106270						21811640																		19961569				22983956		22427910
9687526	PMC2212477	PLoS One	1998	24131481						21812995																		19997493				22984567		22438920
9687526	PMC2212477	PLoS One	1998	24131623						21813021																		19997557				22984603		22439739
9687535	PMC2212479	PLoS One	1998	24136392						21814234																		19997594				22989354		22451728
9687535	PMC2212479	PLoS One	1998	24146959						21818357																		20011099				23011134		22451731
9689026	PMC2525745	PLoS One	1998	24147020						21826239																		20015370				23017109		22451732
9703488	PMC1533335	PLoS One	1998	24160179						21831286																		20016851				23024820		22451741
9705611	PMC1781837	PLoS One	1998	24167638						21833029																		20019802				23029057		22455545
9705956	PMC2213356	PLoS One	1998	24175283						21834963																		20021638				23029139		22457829
9716025	PMC2063094	PLoS One	1998	24204574						21838927																		20157512				23029293		22479178
9716031	PMC2063101	PLoS One	1998	24204892						21846369																		20169102				23029473		22479181
9722615	PMC2132878	PLoS One	1998	24205036						21847079																		19298598				23046573		22479635
9722615	PMC2132878	PLoS One	1998	24212091						21853126																		19455148				23046583		22493704
9722617	PMC2132866	PLoS One	1998	24215514						21853130																		19506559				23055939		22496802
9722617	PMC2132866	PLoS One	1998	24223204						21853140																		19795140				23056220		22496825
9730892	PMC2213400	PLoS One	1998	24223214						21857934																		19801575				23056417		22496920
9730892	PMC2213400	PLoS One	1998	24223934						21858192																		19808781				23071445		22506022
9732295	PMC2149349	PLoS One	1998	24224032						21858228																		19809474				23071453		22507741
9744503	PMC2063053	PLoS One	1998	24236179						21859450																		19823761				23077527		22523585
9744877	PMC2141773	PLoS One	1998	24244619						21859454																		19825844				23077633		22529974
9744877	PMC2141773	PLoS One	1998	24244746						21867749																		19900178				23110050		22535377
9755135	PMC1533198	PLoS One	1998	24260217						21887248																		20007218				23110206		22546040
9763604	PMC2212494	PLoS One	1998	24260554						21897855																		20015957				23112876		22550631
9763604	PMC2212494	PLoS One	1998	24261472						21901135																		20047948				23119043		22553482
9763610	PMC2212487	PLoS One	1998	24261709						21901157																		20049331				23133641		22558320
9763611	PMC2212499	PLoS One	1998	24265824						21909275																		20062542				23152933		22563475
9763611	PMC2212499	PLoS One	1998	24278323						21912705																		20091761				23155407		22583751
9764577	PMC2063126	PLoS One	1998	24278347						21921942																		20098622				23166514		22583915
9764578	PMC2063129	PLoS One	1998	24279743						21935406																		20098681				23185535		22586482
9782127	PMC2213402	PLoS One	1998	24289479						21943279																		20098685				23191958		22615570
9782127	PMC2213402	PLoS One	1998	24303000						21949730																		20098691				23209647		22615863
9782132	PMC2213404	PLoS One	1998	24312159						21949739																		20098733				23217200		22615983
9792339	PMC1781854	PLoS One	1998	24312245						21951588																		20109235				23226316		22617141
9802970	PMC2212520	PLoS One	1998	24312398						21966435																		20110257				23236499		22624016
9802970	PMC2212520	PLoS One	1998	24314141						21968439																		20126456				23245876		22626451
9813099	PMC2148149	PLoS One	1998	24314261						21976971																		20132318				23251447		22640559
9813099	PMC2148149	PLoS One	1998	24319370						21980236																		20140187				23251483		22642811
9813102	PMC2148145	PLoS One	1998	24319687						21984926																		20154710				23285108		22647789
9813102	PMC2148145	PLoS One	1998	24324506						21984939																		20161761				23285140		22647790
9814581	PMC2275993	PLoS One	1998	24324556						21988766																		20161803				23300470		22651370
9814585	PMC2275991	PLoS One	1998	24324578						21989183																		20163734				23300874		22662179
9815260	PMC2212408	PLoS One	1998	24324637						21991388																		20164261				23300938		22672588
9815260	PMC2212408	PLoS One	1998	24324736						22014088																		20174443				23300939		22675567
9815261	PMC2212405	PLoS One	1998	24337353						22022259																		20174577				23224839		22679519
9815265	PMC2212404	PLoS One	1998	24339930						22022379																		20179764				23254930		22691411
9815265	PMC2212404	PLoS One	1998	24339994						22022511																		20190273				23281774		22693450
9815266	PMC2212402	PLoS One	1998	24346830						22022560																		20193086				23295128		22713837
9815266	PMC2212402	PLoS One	1998	24347404						22022578																		20195368				23300487		22716772
9815271	PMC2212417	PLoS One	1998	24349031						22028658																		20195375				23301081		22720036
9815271	PMC2212417	PLoS One	1998	24349299						22028816																		20205720				23301088		22720076
9815272	PMC2212415	PLoS One	1998	24351823						22028901																		20209123				23302418		22722865
9815272	PMC2212415	PLoS One	1998	24357327						22039513																		20211007				23326332		22723917
9817765	PMC2132947	PLoS One	1998	24358274						22043155																		20300527				23341224		22723962
9820174	PMC2062988	PLoS One	1998	24367585						22046294																		20300628				23341784		22732935
9832558	PMC2133070	PLoS One	1998	24370889						22051061																		20305711				23382922		22737068
9832558	PMC2133070	PLoS One	1998	24376654						22065899																		20308426				23382946		22745690
9836478	PMC2063203	PLoS One	1998	24380567						22066019																		20333308				23383290		22761734
9841913	PMC2212378	PLoS One	1998	24385308						22073198																		20339537				23405071		22768116
9841913	PMC2212378	PLoS One	1998	24391843						22087269																		20339550				23409115		22768236
9841914	PMC2212379	PLoS One	1998	24391948						22087314																		20339553				23414597		22773944
9841914	PMC2212379	PLoS One	1998	24392138						22107808																		20346106				23418438		22792298
9841926	PMC2212385	PLoS One	1998	24397824						22114492																		20346117				23418567		22792355
9841926	PMC2212385	PLoS One	1998	24406319						22132120																		20360842				23418589		22792357
9841931	PMC2212397	PLoS One	1998	24416343						22140463																		20368804				23432455		22799533
9851359	PMC2275987	PLoS One	1998	24434515						22143885																		20376313				23437220		22802978
9851361	PMC2275988	PLoS One	1998	24438079						22147993																		20382740				23441122		22808132
9852161	PMC2132976	PLoS One	1998	24449804						22163033																		20383336				23441200		22808250
9852161	PMC2132976	PLoS One	1998	24453431						22165848																		20386595				23451271		22808253
9852162	PMC2132973	PLoS One	1998	24454859						22168384																		20396380				23459932		22808254
9852162	PMC2132973	PLoS One	1998	24460606						22174655																		20398244				23462811		22815957
9852163	PMC2132985	PLoS One	1998	24465413						22176647																		20405040				23468640		22823934
9852163	PMC2132985	PLoS One	1998	24465508						22179060																		20405042				23469037		22826298
9858514	PMC2212427	PLoS One	1998	24465746						22192404																		20409077				23470542		22827851
9858514	PMC2212427	PLoS One	1998	24465805						22194995																		20409326				23471914		22844426
9860888	PMC1533461	PLoS One	1998	24466263						22200740																		20414335				23472112		22844473
9860890	PMC1533448	PLoS One	1998	24466304						22206623																		20414748				23475610		22844476
9862571	PMC2063239	PLoS One	1998	24467451						22249030																		20419161				23479740		22844481
9864372	PMC2175212	PLoS One	1998	24477215						22249125																		20422297				23505376		22848506
9864372	PMC2175212	PLoS One	1998	24479820						22272104																		20426821				23516444		22848791
9864373	PMC2175228	PLoS One	1998	24485356						22355603																		20428246				23520473		22857743
9883969	PMC1781860	PLoS One	1998	24487918						22363217																		20436680				23527305		22860150
10461365	PMC2578998	PLoS One	1998	24489659						21666721																		20479943				23540940		22866923
9874565	PMC1887695	PLoS One	1999	24489731						21685943																		20485502				23547100		22870337
9874565	PMC1887695	PLoS One	1999	24490809						21706055																		20494921				23554981		22876751
9874575	PMC1887699	PLoS One	1999	24498071						21725368																		20495529				23560052		22879974
9874575	PMC1887699	PLoS One	1999	24498194						21743498																		20498711				23565921		22879984
9892617	PMC2192977	PLoS One	1999	24498301						21765465																		20498848				23577145		22880074
9892617	PMC2192977	PLoS One	1999	24498325						21785465																		20505772				23593020		22882874
9892623	PMC2192994	PLoS One	1999	24498880						21881595																		20520819				23596509		22889153
9892623	PMC2192994	PLoS One	1999	24502628						21938482																		20529287				23597049		22897969
9892625	PMC2192978	PLoS One	1999	24503654						21960247																		20529328				23611944		22900128
9892625	PMC2192978	PLoS One	1999	24504138						21975825																		20532168				23613869		22905869
9924013	PMC1566344	PLoS One	1999	24520391						21986948																		20535217				23613947		22909213
9924017	PMC1566340	PLoS One	1999	24520398						21996748																		20574530				23626716		22911850
9927507	PMC2192914	PLoS One	1999	24523936						22011396																		20585470				23626768		22913428
9927507	PMC2192914	PLoS One	1999	24529306						22011905																		20593011				23671637		22928052
9927509	PMC2192912	PLoS One	1999	24533117						22020333																		20604940				23675524		22928057
9927509	PMC2192912	PLoS One	1999	24551105						22037215																		20604941				23684315		22949746
9927511	PMC2192910	PLoS One	1999	24558445						22045025																		20610667				23707074		22952678
9927511	PMC2192910	PLoS One	1999	24566895						22146521																		20625432				23741431		22952892
9927515	PMC2192918	PLoS One	1999	24586312						22218393																		20625437				23775142		22952980
9927515	PMC2192918	PLoS One	1999	24586350						22226043																		20625482				23806618		22969170
9927517	PMC2192913	PLoS One	1999	24586364						22226054																		20628639				23826306		22970147
9927517	PMC2192913	PLoS One	1999	24586387						22228572																		20628647				23828222		22970191
9971739	PMC2132913	PLoS One	1999	24586646						22228755																		20630068				23835187		22973560
9971739	PMC2132913	PLoS One	1999	24586749						22235273																		20634955				23837666		23000585
9989976	PMC2192941	PLoS One	1999	24587008						22235331																		20638879				23840007		23009705
9989980	PMC2192926	PLoS One	1999	24587164						22238064																		20638882				23840597		23027614
9989980	PMC2192926	PLoS One	1999	24587178						22239913																		20640189				23844236		23028722
9989983	PMC2192935	PLoS One	1999	24587248						22242155																		20657731				23866078		23028924
9989988	PMC2192923	PLoS One	1999	24595452						22244053																		20659958				23867462		23029401
9989988	PMC2192923	PLoS One	1999	24608696						22251838																		20660618				23874234		23029425
10037783	PMC2132934	PLoS One	1999	24616379						22253802																		20661276				23892605		23056268
10037783	PMC2132934	PLoS One	1999	24621388						22264274																		20668697				23894429		23056391
10037795	PMC2132941	PLoS One	1999	24630173						22275470																		20673327				23922890		23071253
10049944	PMC2192943	PLoS One	1999	24637518						22275865																		20676377				23925565		23071439
10049944	PMC2192943	PLoS One	1999	24646493						22276142																		20680099				23934451		23071620
10064548	PMC1566393	PLoS One	1999	24657385						22277639																		20686515				23936608		23077483
10070867	PMC2362659	PLoS One	1999	24662163						22279083																		20700442				23967309		23077564
10070870	PMC2362679	PLoS One	1999	24667691						22279574																		20700542				23976982		23082163
10070874	PMC2362693	PLoS One	1999	24669277						22280969																		20711468				24022509		23082164
10075985	PMC2193045	PLoS One	1999	24670382						22303450																		20730033				24030951		23082205
10075985	PMC2193045	PLoS One	1999	24682292						22307817																		20735819				24039599		23087911
10087268	PMC2150591	PLoS One	1999	24685144						22319569																		20804588				24039757		23091640
10087268	PMC2150591	PLoS One	1999	24686534						22323550																		20804589				24039817		23101660
10098731	PMC2362228	PLoS One	1999	24690995						22327365																		20804628				24039873		23107128
10098738	PMC2362260	PLoS One	1999	24692845						22347416																		20806064				24068166		23107170
10098745	PMC2362254	PLoS One	1999	24695114						22347450																		20808797				24086135		23110112
10188873	PMC2362701	PLoS One	1999	24705922						22348067																		20808828				24086324		23119083
10188882	PMC2362740	PLoS One	1999	24708836						22348081																		20811645				24086450		23133377
10190895	PMC2193002	PLoS One	1999	24713818						22348147																		20814579				24086556		23133489
10190895	PMC2193002	PLoS One	1999	24719553						22348342																		20826782				24128676		23133514
10190904	PMC2193007	PLoS One	1999	24719563						22351932																		20827278				24160175		23133523
10190904	PMC2193007	PLoS One	1999	24721803						22360854																		20830289				24170720		23142821
10209046	PMC2193035	PLoS One	1999	24729664						22362363																		20836877				24172198		23144752
10210693	PMC1566419	PLoS One	1999	24732409						22363765																		20837697				24175617		23144845
10224280	PMC2193055	PLoS One	1999	24736312						22374986																		20844742				24188521		23151408
10224280	PMC2193055	PLoS One	1999	24736644						22383970																		20846376				24192137		23153050
10224284	PMC2193061	PLoS One	1999	24747816						22384017																		20849604				24204323		23153119
10224287	PMC2193056	PLoS One	1999	24751653						22384067																		20856892				24224027		23166492
10224287	PMC2193056	PLoS One	1999	24755147						22392507																		20856896				24236044		23166721
10225952	PMC2185074	PLoS One	1999	24772433						22393458																		20858271				24244464		23166823
10225952	PMC2185074	PLoS One	1999	24788674						22396748																		20858605				24244537		23181694
10225957	PMC2185078	PLoS One	1999	24804211						22397502																		20860833				24244584		23185574
10225957	PMC2185078	PLoS One	1999	24804235						22408137																		20862226				24244600		23185614
10225962	PMC2185087	PLoS One	1999	24807380						22418445																		20862357				24253616		23189195
10228181	PMC2222908	PLoS One	1999	24810044						22419113																		20862369				24256636		23193519
10231015	PMC1784707	PLoS One	1999	24811731						22426694																		20876612				24260480		23209417
10330409	PMC2133177	PLoS One	1999	24819536						22427843																		20878767				24265785		23209633
10330409	PMC2133177	PLoS One	1999	24821909						22428048																		20886045				24274089		23209841
10330439	PMC2193640	PLoS One	1999	24831292						22432006																		20886067				24274622		23226456
10330440	PMC2193639	PLoS One	1999	24837086						22432595																		20886071				24293254		23226463
10330443	PMC2193634	PLoS One	1999	24840793						22437631																		20886088				24303013		23226464
10330446	PMC2193641	PLoS One	1999	24848689						22438824																		20920207				24312420		23236281
10330447	PMC2193633	PLoS One	1999	24858807						22438825																		20927333				24324819		23237504
10331566	PMC3054368	PLoS One	1999	24876671						22447225																		20930939				24336051		23239972
10352020	PMC2133127	PLoS One	1999	24884436						22447450																		20946660				24341866		23253140
10352020	PMC2133127	PLoS One	1999	24886391						22448237																		20953205				24367272		23270301
10352025	PMC2133131	PLoS One	1999	24886907						22448259																		20957154				24376631		23271968
10352025	PMC2133131	PLoS One	1999	24887083						22452810																		20957200				24385930		23272112
10359584	PMC2193088	PLoS One	1999	24891297						22457761																		20964829				24117685		23272237
10359584	PMC2193088	PLoS One	1999	24893162						22458853																		20967130				24161480		23272262
10366601	PMC2133157	PLoS One	1999	24903055						22461904																		20976070				24210254		23284865
10366601	PMC2133157	PLoS One	1999	24908187						22464650																		20976108				24427314		23284939
10377191	PMC2192958	PLoS One	1999	24933211						22470504																		20976216				24441878		23285063
10377191	PMC2192958	PLoS One	1999	24936442						22472882																		20977736				24446963		23285237
10377193	PMC2192974	PLoS One	1999	24950187						22479530																		21034515				24465814		23287128
10377193	PMC2192974	PLoS One	1999	24954347						22479645																		21044321				24466128		23300439
10385520	PMC2133173	PLoS One	1999	24955140						22485151																		21048992				24470489		23300550
10385520	PMC2133173	PLoS One	1999	24958777						22485175																		21052083				24497575		23300718
10389984	PMC2363000	PLoS One	1999	24959004						22491425																		21059265				24498144		23300932
10389991	PMC2363015	PLoS One	1999	24965024						22496756																		21080947				24503708		22692455
10402165	PMC3054371	PLoS One	1999	24998254						22500097																		21085654				24517102		23168836
10402169	PMC3054385	PLoS One	1999	24999295						22514210																		21085708				24525730		23235292
10402171	PMC3054388	PLoS One	1999	25000405						22525425																		21102999				24548049		23254286
10402455	PMC2199729	PLoS One	1999	25006976						22526510																		21103342				24586443		23301070
10402455	PMC2199729	PLoS One	1999	25017872						22530040																		21103348				24586561		23301074
10402469	PMC2199745	PLoS One	1999	25028667						22530952																		21103384				24586687		23301078
10402475	PMC2199732	PLoS One	1999	25038795						22531600																		21108841				24586819		23308233
10402475	PMC2199732	PLoS One	1999	25047106						22532830																		21110029				24593993		23326232
10408394	PMC2363166	PLoS One	1999	25051449						22536156																		21116635				24594686		23334235
10408701	PMC2362153	PLoS One	1999	25054159						22536942																		21122103				24597481		23335994
10429669	PMC2195563	PLoS One	1999	25054224						22537085																		21124890				24624994		23337382
10429669	PMC2195563	PLoS One	1999	25056698						22548760																		21138577				24655482		23342173
10429676	PMC2195555	PLoS One	1999	25056700						22558071																		21151910				24667730		23347395
10429676	PMC2195555	PLoS One	1999	25084093						22563073																		21152017				24667816		23349773
10430621	PMC2195591	PLoS One	1999	25097276						22584637																		21170307				24672053		23349783
10430625	PMC2195587	PLoS One	1999	25101679						22585399																		21172011				24694184		23349889
10430625	PMC2195587	PLoS One	1999	25101768						22592113																		21179200				24700285		23358433
10430628	PMC2195593	PLoS One	1999	25104735						22593679																		21179208				24708899		23359320
10471037	PMC2363142	PLoS One	1999	25105129						22595792																		21179415				24722417		23383021
10477546	PMC2195615	PLoS One	1999	25108425						22605931																		21179451				24732879		23383181
10477546	PMC2195615	PLoS One	1999	25113792						22606292																		21187970				24760006		23383295
10477549	PMC2195612	PLoS One	1999	25166508						22606303																		21274455				24767545		23386437
10477552	PMC2195618	PLoS One	1999	25280587						22606359																		21368864				24801216		23387852
10477552	PMC2195618	PLoS One	1999	25315906						22615798																		21368881				24810691		23424637
10477553	PMC2195620	PLoS One	1999							22616919																		20439316				24826990		23437211
10477557	PMC2195617	PLoS One	1999							22621282																		20603624				24827932		23437409
10477557	PMC2195617	PLoS One	1999							22624014																		20661652				24838000		23437410
10477558	PMC2195614	PLoS One	1999							22629369																		20945165				24840056		23441208
10487611	PMC2374344	PLoS One	1999							22640261																		20959636				24846272		23453057
10491391	PMC2156125	PLoS One	1999							22646761																		20963507				24860168		23459556
10491391	PMC2156125	PLoS One	1999							22647055																		20976258				24877142		23467583
10496342	PMC2362862	PLoS One	1999							22647088																		21040618				24885175		23469125
10499926	PMC2195628	PLoS One	1999							22649008																		21047530				24886182		23483844
10502537	PMC1566261	PLoS One	1999							22654675																		21120444				24887158		23497610
10502538	PMC1566253	PLoS One	1999							22662126																		21149547				24893973		23505367
10510081	PMC2195652	PLoS One	1999							22666336																		21153406				24918638		23505411
10510081	PMC2195652	PLoS One	1999							22672897																		21183473				24938805		23516588
10510086	PMC2195642	PLoS One	1999							22677907																		21199860				24948358		23516649
10510086	PMC2195642	PLoS One	1999							22678923																		21209625				25001218		23517052
10510087	PMC2195640	PLoS One	1999							22693649																		21223590				25010494		23519031
10510091	PMC2195647	PLoS One	1999							22701659																		21224064				25026958		23521724
10523604	PMC2195657	PLoS One	1999							22704648																		21234330				25052193		23527208
10523604	PMC2195657	PLoS One	1999							22708734																		21235769				25062954		23527234
10523605	PMC2195664	PLoS One	1999							22719879																		21235806				25084970		23527295
10523609	PMC2195670	PLoS One	1999							22723990																		21245015				25086961		23536867
10523609	PMC2195670	PLoS One	1999							22728711																		21248377				25089901		23544138
10523616	PMC2195659	PLoS One	1999							22736457																		21249153				25103619		23555250
10525529	PMC2174216	PLoS One	1999							22736596																		21249178				25107912		23555255
10544193	PMC2195677	PLoS One	1999							22737248																		21249202				25108525		23555678
10544193	PMC2195677	PLoS One	1999							22744210																		21253580				25348630		23555725
10544197	PMC2195679	PLoS One	1999							22745537																		21262862						23555760
10544200	PMC2195686	PLoS One	1999							22745659																		21264226						23555767
10544200	PMC2195686	PLoS One	1999							22751903																		21264286						23555939
10544206	PMC2195675	PLoS One	1999							22761662																		21272373						23555961
10544206	PMC2195675	PLoS One	1999							22761897																		21278785						23565274
10544207	PMC2195682	PLoS One	1999							22761929																		21283659						23570545
10555746	PMC2374293	PLoS One	1999							22763451																		21291534						23577057
10562316	PMC2195694	PLoS One	1999							22788551																		21298000						23577080
10562322	PMC2195702	PLoS One	1999							22801546																		21298075						23577770
10562322	PMC2195702	PLoS One	1999							22805330																		21299873						23579784
10574250	PMC2362886	PLoS One	1999							22815651																		21299906						23592983
10576142	PMC3054468	PLoS One	1999							22815882																		21304945						23593002
10576652	PMC2362957	PLoS One	1999							22815940																		21304957						23593201
10578013	PMC2230648	PLoS One	1999							22825326																		21304989						23593251
10584876	PMC2374324	PLoS One	1999							22827934																		21319344						23593362
10587348	PMC2195736	PLoS One	1999							22829980																		21325625						23593453
10587360	PMC2195729	PLoS One	1999							22842729																		21326233						23611895
10587360	PMC2195729	PLoS One	1999							22843615																		21331663						23612313
10601345	PMC2168094	PLoS One	1999							22844244																		21346813						23613884
10601345	PMC2168094	PLoS One	1999							22844466																		21347380						23617550
10601355	PMC2195720	PLoS One	1999							22846631																		21364922						23617605
10601355	PMC2195720	PLoS One	1999							22848504																		21364987						23620814
10601356	PMC2195716	PLoS One	1999							22848627																		21368900						23632211
10601360	PMC2195708	PLoS One	1999							22848656																		21379584						23637827
10601360	PMC2195708	PLoS One	1999							22857000																		21380844						23642259
10604722	PMC2362975	PLoS One	1999							22870269																		21383057						23646181
10613905	PMC2174246	PLoS One	1999							22870292																		21383850						23653448
10613905	PMC2174246	PLoS One	1999							22870330																		21385380						23656976
10636477	PMC2276039	PLoS One	1999							22874998																		21397024						23658634
10636478	PMC2276038	PLoS One	1999							22875001																		21399908						23658662
10642937	PMC3054440	PLoS One	1999							22876303																		21409417						23658749
10642943	PMC3054436	PLoS One	1999							22878175																		21412276						23660989
10704086	PMC1781782	PLoS One	1999							22879947																		21412423						23671716
15132161	PMC2151189	PLoS One	1999							22880004																		21423579						23675429
15132161	PMC2151189	PLoS One	1999							22880080																		21423608						23675482
10613915	PMC1887782	PLoS One	2000							22888250																		21423695						23675550
10613915	PMC1887782	PLoS One	2000							22905243																		21423764						23696894
10620525	PMC1637864	PLoS One	2000							22916251																		21427130						23698100
10620617	PMC2195808	PLoS One	2000							22916270																		21435199						23700470
10620617	PMC2195808	PLoS One	2000							22929213																		21437247						23710083
10637268	PMC2195753	PLoS One	2000							22929882																		21445032						23717489
10637268	PMC2195753	PLoS One	2000							22929887																		21445057						23717701
10637274	PMC2195758	PLoS One	2000							22931209																		21445238						23718711
10637274	PMC2195758	PLoS One	2000							22934133																		21445241						23723978
10637275	PMC2195765	PLoS One	2000							22935085																		21445247						23734932
10637275	PMC2195765	PLoS One	2000							22935382																		21445271						23735014
10637280	PMC2195745	PLoS One	2000							22937084																		21445308						23736287
10637280	PMC2195745	PLoS One	2000							22945357																		21445359						23741368
10646903	PMC2363264	PLoS One	2000							22952709																		21447193						23741420
10646906	PMC2363286	PLoS One	2000							22952723																		21455316						23742026
10651857	PMC3655541	PLoS One	2000							22952764																		21464953						23758678
10651857	PMC3655541	PLoS One	2000							22952779																		21477373						23762234
10662781	PMC2174807	PLoS One	2000							22952867																		21483675						23762356
10662781	PMC2174807	PLoS One	2000							22952916																		21483838						23773211
10662804	PMC2195810	PLoS One	2000							22957017																		21492450						23773726
10662804	PMC2195810	PLoS One	2000							22957072																		21509823						23784148
10684246	PMC2169371	PLoS One	2000							22970136																		21521528						23785507
10684246	PMC2169371	PLoS One	2000							22973541																		21533102						23785533
10684861	PMC2195845	PLoS One	2000							22978453																		21533146						23785537
10684861	PMC2195845	PLoS One	2000							22984515																		21533254						23785538
10704448	PMC2174546	PLoS One	2000							23002387																		21540242						23805945
10704448	PMC2174546	PLoS One	2000							23024755																		21541278						23809248
10704458	PMC2195861	PLoS One	2000							23028537																		21549006						23816343
10704458	PMC2195861	PLoS One	2000							23028879																		21552537						23820163
10704459	PMC2195858	PLoS One	2000							23028986																		21573167						23820392
10704459	PMC2195858	PLoS One	2000							23029098																		21576125						23820393
10704460	PMC2195854	PLoS One	2000							23029301																		21593432						23822604
10704460	PMC2195854	PLoS One	2000							23029451																		21594677						23825590
10704469	PMC2195853	PLoS One	2000							23029485																		21596768						23825679
10704469	PMC2195853	PLoS One	2000							23031500																		21603578						23826346
10704470	PMC2195851	PLoS One	2000							23034331																		21603621						23840852
10704470	PMC2195851	PLoS One	2000							23041950																		21611124						23840854
10725323	PMC2174319	PLoS One	2000							23043547																		21611204						23860099
10725323	PMC2174319	PLoS One	2000							23045606																		21623382						23860770
10727467	PMC2193111	PLoS One	2000							23046546																		21624133						23864739
10727469	PMC2193113	PLoS One	2000							23049897																		21625423						23874584
10727469	PMC2193113	PLoS One	2000							23055722																		21625469						23874808
10732771	PMC2374415	PLoS One	2000							23055814																		21625620						23874826
10737387	PMC2374428	PLoS One	2000							23056173																		21625635						23874957
10748236	PMC2193176	PLoS One	2000							23071702																		21639930						23882139
10748236	PMC2193176	PLoS One	2000							23071764																		21641937						23886803
10748242	PMC2193173	PLoS One	2000							23071775																		21647369						23890251
10748242	PMC2193173	PLoS One	2000							23074115																		21655287						23895213
10755885	PMC2195856	PLoS One	2000							23077548																		21660140						23900170
10803701	PMC3054605	PLoS One	2000							23077553																		21674808						23900173
10811821	PMC2174559	PLoS One	2000							23077666																		21676234						23902681
10811836	PMC2174562	PLoS One	2000							23077727																		21677773						23902802
10811836	PMC2174562	PLoS One	2000							23078969																		21687686						23903055
10811870	PMC2193160	PLoS One	2000							23093861																		21689754						23903059
10811870	PMC2193160	PLoS One	2000							23102107																		21693554						23903655
10827114	PMC2640872	PLoS One	2000							23103862																		21695208						23903978
10831606	PMC2174827	PLoS One	2000							23111059																		21698255						23903987
10831606	PMC2174827	PLoS One	2000							23112819																		21698260						23927489
10839808	PMC2213526	PLoS One	2000							23117593																		21702922						23936069
10839808	PMC2213526	PLoS One	2000							23118721																		21708955						23936104
10839809	PMC2213520	PLoS One	2000							23118725																		21711557						23936115
10839809	PMC2213520	PLoS One	2000							23118901																		21712989						23936152
10839814	PMC2213528	PLoS One	2000							23118918																		21731499						23936347
10839814	PMC2213528	PLoS One	2000							23119079																		21736743						23936388
10859330	PMC2193202	PLoS One	2000							23123616																		21738735						23936793
10859330	PMC2193202	PLoS One	2000							23131872																		21738757						23937079
10859343	PMC2193200	PLoS One	2000							23134699																		21738789						23937452
10877450	PMC1781742	PLoS One	2000							23139820																		21747957						23940650
10877454	PMC1781739	PLoS One	2000							23151305																		21750683						23940775
10880524	PMC1887714	PLoS One	2000							23164239																		21755005						23940777
10880533	PMC1887710	PLoS One	2000							23166633																		21756313						23941427
10880533	PMC1887710	PLoS One	2000							23166727																		21760962						23950998
10883671	PMC2374539	PLoS One	2000							23170076																		21765802						23951007
10893274	PMC2185555	PLoS One	2000							23170088																		21765939						23951074
10893274	PMC2185555	PLoS One	2000							23173060																		21786300						23951243
10895977	PMC3054631	PLoS One	2000							23175106																		21794126						23951309
10899903	PMC2193256	PLoS One	2000							23176143																		21808223						23951382
10899915	PMC2193253	PLoS One	2000							23183846																		21808883						23966857
10899915	PMC2193253	PLoS One	2000							23185335																		21809420						23967119
10900458	PMC2448327	PLoS One	2000							23185521																		21812967						23967147
10919872	PMC2229488	PLoS One	2000							23193368																		21816038						23967322
10931876	PMC2175205	PLoS One	2000							23209640																		21818316						23968249
10931876	PMC2175205	PLoS One	2000							23216862																		21818352						23972034
10934225	PMC2193221	PLoS One	2000							23226219																		21827663						23977065
10934225	PMC2193221	PLoS One	2000							23226334																		21829175						23977160
10934231	PMC2193219	PLoS One	2000							23226501																		21832989						23977248
10934231	PMC2193219	PLoS One	2000							23226526																		21841757						23977377
10934234	PMC2193222	PLoS One	2000							23231648																		21843349						23980694
10952717	PMC2193241	PLoS One	2000							23232667																		21850191						23982068
10952722	PMC2193244	PLoS One	2000							23234329																		21850243						23984396
10952722	PMC2193244	PLoS One	2000							23234398																		21854582						23991083
10952998	PMC2175286	PLoS One	2000							23236487																		21857957						23991203
10953016	PMC2175283	PLoS One	2000							23250422																		21858002						24007444
10953016	PMC2175283	PLoS One	2000							23251384																		21858040						24022374
10958379	PMC1781751	PLoS One	2000							23251462																		21876524						24023628
10958380	PMC1781752	PLoS One	2000							23251519																		21876530						24023720
10973990	PMC2175245	PLoS One	2000							23270473																		21876739						24023870
10973990	PMC2175245	PLoS One	2000							23272093																		21876744						24023963
10993655	PMC2363553	PLoS One	2000							23272114																		21876755						24027765
10993913	PMC2193283	PLoS One	2000							23272179																		21882344						24034228
10995453	PMC2150697	PLoS One	2000							23275880																		21887366						24037197
10995453	PMC2150697	PLoS One	2000							23284678																		21897851						24040152
11015448	PMC2193310	PLoS One	2000							23284733																		21899735						24040367
11027434	PMC2363579	PLoS One	2000							23285296																		21900963						24040376
11034599	PMC2195863	PLoS One	2000							23300782																		21906401						24040429
11034608	PMC2195876	PLoS One	2000							23304254																		21909419						24045639
11034608	PMC2195876	PLoS One	2000							23346016																		21912697						24053449
11038185	PMC2192642	PLoS One	2000							22287596																		21918544						24058536
11038185	PMC2192642	PLoS One	2000							22370636																		21931637						24058538
11038186	PMC2192631	PLoS One	2000							22402322																		21931779						24058590
11038186	PMC2192631	PLoS One	2000							22430207																		21931787						24058595
11038264	PMC29077	PLoS One	2000							22466618																		21934905						24058668
11044352	PMC2408782	PLoS One	2000							22699362																		21936896						24058676
11049819	PMC1240131	PLoS One	2000							22733137																		21949705						24059458
11056687	PMC13917	PLoS One	2000							22871992																		21953411						24064796
11056687	PMC13917	PLoS One	2000							22875335																		21955788						24066118
11062258	PMC2185583	PLoS One	2000							22968420																		21957448						24066174
11062258	PMC2185583	PLoS One	2000							22982628																		21958474						24068916
11062270	PMC2185580	PLoS One	2000							22986529																		21964919						24068938
11062270	PMC2185580	PLoS One	2000							23065639																		21966373						24069320
11068989	PMC3054675	PLoS One	2000							23076771																		21978358						24069337
11076963	PMC2169450	PLoS One	2000							23104432																		21979052						24073293
11076963	PMC2169450	PLoS One	2000							23118343																		21980309						24073762
11086005	PMC2174348	PLoS One	2000							23123645																		21980472						24083230
11097211	PMC2276047	PLoS One	2000							23143107																		21980482						24086456
11104577	PMC2363443	PLoS One	2000							23178498																		21980529						24086542
11104800	PMC2193102	PLoS One	2000							23184608																		21995345						24086725
11104800	PMC2193102	PLoS One	2000							23202800																		21995845						24088531
11104803	PMC2193106	PLoS One	2000							23223138																		21998625						24090087
11104803	PMC2193106	PLoS One	2000							23297316																		21998733						24098456
11104806	PMC2193105	PLoS One	2000							23298290																		22001907						24098563
11104806	PMC2193105	PLoS One	2000							23299801																		22003386						24106222
11104807	PMC2193098	PLoS One	2000							23308230																		22008183						24106230
11104807	PMC2193098	PLoS One	2000							23326300																		22016787						24106515
11120771	PMC2213504	PLoS One	2000							23326303																		22022192						24115583
11120771	PMC2213504	PLoS One	2000							23326556																		22022281						24116019
11120777	PMC2213505	PLoS One	2000							23327547																		22022446						24143212
11120777	PMC2213505	PLoS One	2000							23328228																		22023914						24146869
11120781	PMC2213497	PLoS One	2000							23331017																		22028672						24147040
11120781	PMC2213497	PLoS One	2000							23342984																		22028789						24155939
11134085	PMC2150676	PLoS One	2000							23343252																		22028832						24156277
11134085	PMC2150676	PLoS One	2000							23347638																		22029574						24164705
11178239	PMC15024	PLoS One	2000							23372655																		22029605						24167594
11200363	PMC1781766	PLoS One	2000							23380875																		22029666						24179562
11293811	PMC2276061	PLoS One	2000							23382905																		22029713						24180253
11293812	PMC2276063	PLoS One	2000							23385731																		22031297						24187666
11467416	PMC2477743	PLoS One	2000							23390484																		22035425						24188212
11467420	PMC2477741	PLoS One	2000							23404288																		22039518						24198843
11469393	PMC2477754	PLoS One	2000							23405215																		22039527						24204622
11469399	PMC2477761	PLoS One	2000							23407024																		22043175						24204830
11486483	PMC2565358	PLoS One	2000							23408899																		22043283						24204962
11486485	PMC2565357	PLoS One	2000							23409104																		22046307						24204976
11136817	PMC2195879	PLoS One	2001							23414068																		22046428						24209388
11139319	PMC2363619	PLoS One	2001							23418460																		22047141						24236032
11148224	PMC2193340	PLoS One	2001							23418494																		22053950						24244362
11157048	PMC2195922	J Exp Med	2001							23423247																		22067412						24250805
11157053	PMC2195926	PLoS One	2001							23424671																		22070775						24255126
11157056	PMC2195915	PLoS One	2001							23426136																		22072968						24257155
11157990	PMC2195993	PLoS One	2001							23429470																		22073162						24260464
11171521	PMC1242047	PLoS One	2001							23432760																		22073306						24267638
11171525	PMC1242051	PLoS One	2001							23435420																		22076159						24267791
11178105	PMC31335	PLoS One	2001							23437297																		22078261						24278312
11178107	PMC29081	PLoS One	2001							23437388																		22096518						24282553
11181696	PMC2195903	PLoS One	2001							23441611																		22112588						24308795
11181698	PMC2195902	PLoS One	2001							23448290																		22114680						24313934
11181705	PMC2195901	PLoS One	2001							23451107																		22118545						24319531
11208862	PMC2193336	PLoS One	2001							23454836																		22132113						24324734
11225590	PMC2363731	PLoS One	2001							23454868																		22132157						24324838
11228591	PMC31337	PLoS One	2001							23455320																		22140466						24325943
11231877	PMC29068	PLoS One	2001							23457529																		22140471						24327787
11238588	PMC2193397	PLoS One	2001							23457589																		22145038						24327788
11238590	PMC2193393	PLoS One	2001							23457640																		22152221						24336061
11238596	PMC2193390	PLoS One	2001							23460847																		22162136						24339869
11252156	PMC29084	PLoS One	2001							23468991																		22163015						24341411
11257121	PMC2199213	PLoS One	2001							23471001																		22164231						24348248
11257138	PMC2193420	PLoS One	2001							23471917																		22164245						24349383
11257140	PMC2193418	PLoS One	2001							23472187																		22165993						24358269
11259097	PMC2363807	PLoS One	2001							23496860																		22174738						24367266
11259101	PMC2363820	PLoS One	2001							23497166																		22174871						24367713
11266447	PMC2199607	PLoS One	2001							23503473																		22174884						24369005
11266450	PMC2199616	PLoS One	2001							23505444																		22174927						24369533
11266458	PMC2195787	PLoS One	2001							23516545																		22192148						24369539
11266473	PMC2195776	PLoS One	2001							23516616																		22196084						24376599
11266477	PMC2195778	PLoS One	2001							23517578																		22204304						24376637
11283152	PMC2193369	PLoS One	2001							23520486																		22206005						24376704
11286637	PMC31331	PLoS One	2001							23527092																		22216111						24376710
11298353	PMC4270030	PLoS One	2001							23527181																		22216257						24385907
11304550	PMC2193401	PLoS One	2001							23530816																		22355521						24391809
11305942	PMC31483	PLoS One	2001							23536778																		22355639						24454472
11308262	PMC2363859	PLoS One	2001							23536795																		22355654						23512834
11308266	PMC2363854	PLoS One	2001							23542634																		20644563						23929707
11319941	PMC31432	PLoS One	2001							23544127																		21431350						24022847
11356184	PMC32182	PLoS One	2001							23548101																		21638029						24115079
11359696	PMC1240676	PLoS One	2001							23552524																		21843906						24129165
11369788	PMC2193329	PLoS One	2001							23555570																		21850052						24136208
11381079	PMC2174338	PLoS One	2001							23555653																		21870131						24163420
11381087	PMC2174327	PLoS One	2001							23555747																		21875408						24225363
11387038	PMC32189	PLoS One	2001							23555816																		21918553						24271778
11389773	PMC32198	PLoS One	2001							23555837																		21935678						24373385
11390430	PMC2193379	PLoS One	2001							23555858																		21954065						24378591
11390440	PMC2193383	PLoS One	2001							23560112																		21960009						24413286
11390441	PMC2193386	PLoS One	2001							23565227																		22020633						24416370
11394964	PMC32249	PLoS One	2001							23577091																		22130448						24424041
11401324	PMC2363677	PLoS One	2001							23577210																		22170863						24443543
11405555	PMC1781698	PLoS One	2001							23579947																		22171071						24447605
11405556	PMC1781695	PLoS One	2001							23585844																		22178654						24447898
11429443	PMC2233748	PLoS One	2001							23585892																		22179976						24456653
11430765	PMC33517	PLoS One	2001							23585898																		22198570						24456815
11435469	PMC2193439	PLoS One	2001							23589074																		22222029						24460618
11448989	PMC2196874	PLoS One	2001							23589566																		22225533						24463623
11449002	PMC2196865	PLoS One	2001							23589626																		22228756						24465207
11457896	PMC2193453	PLoS One	2001							23590467																		22238669						24465641
11457897	PMC2193448	PLoS One	2001							23593223																		22238679						24465734
11461091	PMC2364034	PLoS One	2001							23593291																		22238680						24465940
11470819	PMC2150753	PLoS One	2001							23593347																		22238689						24466045
11476671	PMC35354	PLoS One	2001							23606570																		22248045						24466286
11487276	PMC2364076	PLoS One	2001							23608756																		22248049						24475195
11489919	PMC2196416	PLoS One	2001							23613996																		22248083						24475243
11489950	PMC2193465	PLoS One	2001							23617998																		22253829						24489720
11514592	PMC2196455	PLoS One	2001							23618526																		22253929						24489798
11514597	PMC2193506	PLoS One	2001							23619564																		22257369						24496826
11514605	PMC2193493	PLoS One	2001							23620665																		22258561						24497916
11518541	PMC37547	PLoS One	2001							23620793																		22267161						24498105
11532190	PMC48139	PLoS One	2001							23626707																		22269349						24498261
11532192	PMC48141	PLoS One	2001							23626802																		22272290						24498450
11535625	PMC2195946	PLoS One	2001							23627488																		22279084						24502341
11535628	PMC2195939	PLoS One	2001							23628473																		22279584						24505447
11535635	PMC2195945	PLoS One	2001							23633513																		22281016						24509526
11553322	PMC55339	PLoS One	2001							23634283																		22287836						24509810
11556846	PMC2375080	PLoS One	2001							23637799																		22289655						24519126
11556848	PMC2375082	PLoS One	2001							23638013																		22290451						24520424
11564614	PMC1240406	PLoS One	2001							23640395																		22291885						24521864
11564618	PMC1240410	PLoS One	2001							23648546																		22292003						24523886
11577999	PMC1781707	PLoS One	2001							23650499																		22292010						24549845
11581289	PMC2150800	PLoS One	2001							23663506																		22292022						24549847
11589309	PMC2276066	PLoS One	2001							23665297																		22292029						24558422
11591219	PMC57740	PLoS One	2001							23668310																		22300668						24569063
11597334	PMC57797	PLoS One	2001							23671696																		22315091						24587249
11602638	PMC2193510	PLoS One	2001							23672582																		22319620						24587460
11602642	PMC2193519	PLoS One	2001							23675307																		22325008						24589192
11602645	PMC2193516	PLoS One	2001							23690930																		22331205						24595157
11675265	PMC1242076	PLoS One	2001							23691006																		22343072						24595353
11686901	PMC59521	PLoS One	2001							23691100																		22347433						24597857
11696242	PMC59644	PLoS One	2001							23691228																		22347510						24609135
11696557	PMC2198877	PLoS One	2001							23693134																		22348029						24623878
11696586	PMC2195980	PLoS One	2001							23696872																		22348054						24626410
11696599	PMC2195981	PLoS One	2001							23710206																		22348087						24632596
11696604	PMC2233836	PLoS One	2001							23710635																		22348142						24637582
11710833	PMC2375147	PLoS One	2001							23717630																		22351600						24637903
11714727	PMC2150874	PLoS One	2001							23717650																		22355774						24651069
11714751	PMC2193683	PLoS One	2001							23737943																		22356806						24651123
11734073	PMC60661	PLoS One	2001							23738889																		22362175						24651695
11737881	PMC60662	PLoS One	2001							23741457																		22363539						24651711
11737939	PMC138977	PLoS One	2001							23744272																		22363796						24666892
11737945	PMC59991	PLoS One	2001							23755121																		22369693						24666970
11739413	PMC2150907	PLoS One	2001							23755243																		22384032						24667237
11747341	PMC2364005	PLoS One	2001							23758186																		22384217						24667548
11748274	PMC2193581	PLoS One	2001							23762272																		22384253						24667642
11748276	PMC2193574	PLoS One	2001							23762429																		22388933						24667706
11748281	PMC2193577	PLoS One	2001							23762458																		22393392						24670210
11748285	PMC2193571	PLoS One	2001							23767896																		22393426						24670993
11748360	PMC3054787	PLoS One	2001							23776708																		22393443						24677194
11748379	PMC3202212	PLoS One	2001							23777514																		22394266						24685121
11749671	PMC61449	PLoS One	2001							23784081																		22395529						24685242
11759107	PMC1781716	PLoS One	2001							23785504																		22396656						24686247
11782285	PMC64493	PLoS One	2001							23799088																		22397316						24692633
11782291	PMC64498	PLoS One	2001							23799510																		22400710						24694712
11785668	PMC2276073	PLoS One	2001							23800091																		22403710						24699535
11801184	PMC64569	PLoS One	2001							23805780																		22403720						24699793
11817674	PMC1781737	PLoS One	2001							23806234																		22412847						24699832
12018775	PMC2565378	PLoS One	2001							23812004																		22412900						24705197
12369708	PMC2478552	PLoS One	2001							23818762																		22423893						24709804
12369716	PMC2478535	PLoS One	2001							23819124																		22425995						24717449
12369723	PMC2478526	PLoS One	2001							23819126																		22427802						24717526
11781361	PMC2196016	PLoS One	2002							23820165																		22427977						24717726
11790802	PMC2199217	PLoS One	2002							23825648																		22427994						24718810
11806755	PMC64786	PLoS One	2002							23835587																		22438874						24736397
11870548	PMC2375263	PLoS One	2002							23839490																		22438926						24736406
11875743	PMC2375322	PLoS One	2002							23840665																		22438980						24740241
11889141	PMC2173463	PLoS One	2002							23840879																		22442732						24747744
11897009	PMC88886	PLoS One	2002							23841051																		22447154						24754900
11900278	PMC2478568	PLoS One	2002							23842450																		22457780						24770642
11914135	PMC101384	PLoS One	2002							23843936																		22466291						24772428
11927606	PMC2173262	PLoS One	2002							23857061																		22466687						24807690
11929626	PMC2705424	PLoS One	2002							23861320																		22470569						24810588
11943072	PMC107841	PLoS One	2002							23861962																		22471445						24850958
11953833	PMC2364148	PLoS One	2002							23865826																		22472560						24871580
11953836	PMC2364142	PLoS One	2002							23866257																		22475209						24887426
11953867	PMC2364181	PLoS One	2002							23874680																		22488882						24890603
11953892	PMC2375353	PLoS One	2002							23887603																		22491959						24898886
11956231	PMC2199263	PLoS One	2002							23887633																		22496793						24902603
11956288	PMC2193691	PLoS One	2002							23889939																		22496848						24903089
11956298	PMC2193697	PLoS One	2002							23892388																		22508839						24915459
11961306	PMC3054843	PLoS One	2002							23894357																		22509403						24917271
11964188	PMC113740	PLoS One	2002							23899160																		22511962						24917594
11980919	PMC2173286	PLoS One	2002							23901316																		22514711						24922308
11994421	PMC2193704	PLoS One	2002							23919516																		22524543						24927796
12011115	PMC2173854	PLoS One	2002							23922634																		22532851						24932583
12019035	PMC113758	PLoS One	2002							23922763																		22533376						24937303
12021255	PMC2173424	PLoS One	2002							23922938																		22534020						24939647
12034763	PMC2233864	PLoS One	2002							23930205																		22536393						24945909
12060838	PMC1241192	PLoS One	2002							23935247																		22536397						24949479
12061427	PMC1781650	PLoS One	2002							23935856																		22536412						24950196
12070287	PMC2193556	PLoS One	2002							23936028																		22537414						24959425
12079497	PMC116589	PLoS One	2002							23936173																		22539951						24962241
12082083	PMC2173539	PLoS One	2002							23936238																		22540152						24967215
12085212	PMC2746602	PLoS One	2002							23936334																		22549942						24968349
12085215	PMC2746585	PLoS One	2002							23936541																		22558216						24988418
12085216	PMC2746604	PLoS One	2002							23941509																		22558300						25000398
12093375	PMC116725	PLoS One	2002							23945586																		22558322						25013927
12093873	PMC2194014	PLoS One	2002							23951254																		22558334						25016472
12093878	PMC2194017	PLoS One	2002							23955042																		22563398						25027664
12093879	PMC2194013	PLoS One	2002							23967156																		22563483						25029920
12095441	PMC2730321	PLoS One	2002							23967178																		22564895						25036370
12119347	PMC2193927	PLoS One	2002							23975431																		22569191						25045211
12137246	PMC1781655	PLoS One	2002							23977171																		22590551						25047452
12141960	PMC2732528	PLoS One	2002							23985023																		22590645						25052055
12141964	PMC2732511	PLoS One	2002							23991210																		22606355						25072031
12153762	PMC1240952	PLoS One	2002							24002602																		22606356						25077483
12163563	PMC2193944	PLoS One	2002							24002607																		22609489						25077616
12163565	PMC2193939	PLoS One	2002							24010981																		22616849						25077758
12174196	PMC122058	PLoS One	2002							24015231																		22619496						25077759
12177785	PMC2376130	PLoS One	2002							24015932																		22624500						25091724
12186840	PMC2196059	PLoS One	2002							24019914																		22627164						25101306
12186852	PMC2174004	PLoS One	2002							24023608																		22628224						25101682
12186857	PMC2174027	PLoS One	2002							24023893																		22629359						25108672
12188925	PMC122096	PLoS One	2002							24025424																		22629446						25111708
12198088	PMC2229522	PLoS One	2002							24028408																		22632257						25112504
12204819	PMC1240984	PLoS One	2002							24034496																		22640474						25116007
12213839	PMC2173149	PLoS One	2002							24039861																		22642812						25133400
12223110	PMC125301	PLoS One	2002							24040114																		22644036						25133579
12225583	PMC126869	PLoS One	2002							24040160																		22645112						25177550
12232765	PMC2364260	PLoS One	2002							24040339																		22646813						25192845
12235126	PMC2173225	PLoS One	2002							24040358																		22647713						25266106
12241558	PMC130029	PLoS One	2002							24040362																		22654670						25355549
12353658	PMC2276090	PLoS One	2002							24046360																		22662127
12353660	PMC2276091	PLoS One	2002							24058525																		22666365
12353661	PMC2276087	PLoS One	2002							24064977																		22666471
12353662	PMC2276086	PLoS One	2002							24066030																		22675537
12370240	PMC2173499	PLoS One	2002							24066086																		22676725
12370260	PMC2194026	J Exp Med	2002							24069135																		22678059
12391016	PMC2194039	PLoS One	2002							24069136																		22679369
12391023	PMC2194042	PLoS One	2002							24069171																		22685404
12396471	PMC1781669	PLoS One	2002							24069385																		22689910
12396477	PMC1781667	PLoS One	2002							24073414																		22692539
12401133	PMC137576	PLoS One	2002							24079479																		22693571
12417478	PMC1241063	PLoS One	2002							24080367																		22695044
12417483	PMC1241068	PLoS One	2002							24085151																		22696017
12417625	PMC2194104	PLoS One	2002							24086435																		22697885
12417627	PMC2194109	PLoS One	2002							24096601																		22701626
12426144	PMC1241258	PLoS One	2002							24098333																		22703519
12426151	PMC1241265	PLoS One	2002							24098377																		22715999
12438422	PMC2193989	PLoS One	2002							24098593																		22716658
12446740	PMC2173089	PLoS One	2002							24098673																		22723836
12460454	PMC139989	PLoS One	2002							24098752																		22723850
12460799	PMC1241107	PLoS One	2002							24100939																		22723923
12461077	PMC2194263	PLoS One	2002							24101869																		22723997
12461085	PMC2194267	J Exp Med	2002							24107379																		22730000
12467522	PMC1781680	PLoS One	2002							24124051																		22734047
12475395	PMC140028	PLoS One	2002							24124460																		22745655
12486097	PMC2196070	PLoS One	2002							24127404																		22745686
12493079	PMC140031	PLoS One	2002							24130380																		22747753
12739785	PMC2276092	PLoS One	2002							24133573																		22748015
12739787	PMC2276095	PLoS One	2002							24143199																		22750530
12885152	PMC2276105	PLoS One	2002							24143253																		22761835
15144014	PMC2276111	PLoS One	2002							24148528																		22761934
15144019	PMC2276110	PLoS One	2002							24152862																		22768284
12515679	PMC1241306	PLoS One	2003							24166280																		22768297
12515684	PMC1241310	PLoS One	2003							24176855																		22773905
12515817	PMC2193804	PLoS One	2003							24188284																		22792139
12515823	PMC2172739	PLoS One	2003							24196357																		22792360
12530927	PMC149363	PLoS One	2003							24199196																		22802922
12537546	PMC151282	PLoS One	2003							24204315																		22808185
12538662	PMC2193815	PLoS One	2003							24204690																		22808211
12546709	PMC149350	PLoS One	2003							24204943																		22815746
12566412	PMC2193836	PLoS One	2003							24219565																		22815812
12566417	PMC2193840	PLoS One	2003							24223168																		22815892
12573901	PMC1241346	PLoS One	2003							24244446																		22815920
12573914	PMC1241359	PLoS One	2003							24250827																		22815977
12585968	PMC149366	PLoS One	2003							24260246																		22828206
12591907	PMC2193865	PLoS One	2003							24260263																		22829961
12591908	PMC2193863	PLoS One	2003							24260587																		22837815
12597780	PMC153530	PLoS One	2003							24265725																		22839205
12601083	PMC2217330	PLoS One	2003							24265772																		22848491
12605714	PMC149417	PLoS One	2003							24268070																		22848498
12611660	PMC1241388	PLoS One	2003							24278103																		22848620
12615899	PMC2193820	PLoS One	2003							24278200																		22848851
12615907	PMC2193830	PLoS One	2003							24278292																		22860058
12617752	PMC153500	PLoS One	2003							24278473																		22863301
12618887	PMC2376337	PLoS One	2003							24279335																		22866920
12620126	PMC151306	PLoS One	2003							24279644																		22869595
12633535	PMC2732697	PLoS One	2003							24287699																		22870188
12642602	PMC2193851	PLoS One	2003							24287723																		22870339
12642605	PMC2193854	PLoS One	2003							24294600																		22876142
12642616	PMC2173778	PLoS One	2003							24312199																		22876937
12644834	PMC2377081	PLoS One	2003							24312406																		22889165
12646049	PMC151799	PLoS One	2003							24317954																		22892315
12646077	PMC151561	PLoS One	2003							24324595																		22892385
12657159	PMC152637	PLoS One	2003							24324806																		22898872
12659663	PMC153542	PLoS One	2003							24324975																		22900020
12682111	PMC2193884	PLoS One	2003							24330823																		22900024
12685932	PMC153489	PLoS One	2003							24334679																		22903887
12695489	PMC2193874	PLoS One	2003							24339963																		22912741
12695491	PMC2193873	PLoS One	2003							24348684																		22912745
12697052	PMC155647	PLoS One	2003							24349565																		22912838
12697065	PMC155645	PLoS One	2003							24350772																		22912851
12697070	PMC154096	PLoS One	2003							24351817																		22914087
12698199	PMC2747561	PLoS One	2003							24356647																		22914735
12702199	PMC154569	PLoS One	2003							24358335																		22915735
12702215	PMC155646	PLoS One	2003							24362926																		22916012
12716449	PMC154422	PLoS One	2003							24367699																		22916173
12716452	PMC154425	PLoS One	2003							24373196																		22916201
12720572	PMC156636	PLoS One	2003							24376547																		22919518
12732654	PMC2193967	PLoS One	2003							24376772																		22922786
12732655	PMC2193974	PLoS One	2003							24376895																		22925892
12732662	PMC2193979	PLoS One	2003							24386437																		22926222
12735796	PMC156655	PLoS One	2003							24386456																		22927947
12743111	PMC2172943	PLoS One	2003							24391448																		22927985
12743172	PMC2193788	PLoS One	2003							24391453																		22928017
12745665	PMC2479409	PLoS One	2003							24403225																		22928019
12745671	PMC2480500	PLoS One	2003							24403255																		22929597
12749770	PMC155686	PLoS One	2003							24459669																		22937132
12769834	PMC161794	PLoS One	2003							24564886																		22937957
12771178	PMC2193916	PLoS One	2003							23334328																		22941283
12777178	PMC156659	PLoS One	2003							23376849																		22952778
12778080	PMC2741037	PLoS One	2003							23676439																		22952904
12782502	PMC1241535	PLoS One	2003							23851502																		22952933
12782715	PMC2193906	PLoS One	2003							23957304																		22961549
12796467	PMC2193959	PLoS One	2003							23975432																		22963123
12796471	PMC2193961	PLoS One	2003							24013229																		22970194
12799647	PMC2741107	PLoS One	2003							24067278																		22983956
12817992	PMC165023	PLoS One	2003							24092877																		22984567
12821645	PMC2173002	PLoS One	2003							24129822																		22984603
12831397	PMC165588	PLoS One	2003							24286311																		22984623
12831403	PMC198276	PLoS One	2003							24286320																		22989354
12835312	PMC2172728	PLoS One	2003							24297248																		23011134
12835313	PMC2172711	PLoS One	2003							24307564																		23013868
12835474	PMC2234473	PLoS One	2003							24382758																		23017109
12835483	PMC2196078	PLoS One	2003							24384612																		23024820
12838324	PMC2394210	PLoS One	2003							24390633																		23028638
12838326	PMC2394212	PLoS One	2003							24400073																		23028733
12841855	PMC166150	PLoS One	2003							24401838																		23028754
12844362	PMC193633	PLoS One	2003							24403176																		23028819
12847137	PMC2196083	PLoS One	2003							24407190																		23028832
12857597	PMC1781604	PLoS One	2003							24413802																		23028861
12857598	PMC1781606	PLoS One	2003							24416140																		23029057
12860925	PMC2229545	PLoS One	2003							24416207																		23029133
12860929	PMC2194066	PLoS One	2003							24416335																		23029139
12860932	PMC2194079	PLoS One	2003							24416401																		23029293
12860970	PMC2172794	PLoS One	2003							24423923																		23029339
12865923	PMC2394268	PLoS One	2003							24438073																		23029379
12874261	PMC2194077	PLoS One	2003							24438191																		23029473
12874262	PMC2194069	PLoS One	2003							24451168																		23029491
12874266	PMC2194078	PLoS One	2003							24457046																		23033162
12896857	PMC1241617	PLoS One	2003							24457958																		23039175
12900518	PMC2194091	PLoS One	2003							24462734																		23045546
12900523	PMC2194098	PLoS One	2003							24465395																		23046563
12914656	PMC193640	PLoS One	2003							24465590																		23046573
12914671	PMC194589	PLoS One	2003							24465710																		23046583
12923329	PMC3055080	PLoS One	2003							24465768																		23049854
12925238	PMC194730	PLoS One	2003							24466252																		23049879
12925679	PMC2194173	PLoS One	2003							24466321																		23049915
12925704	PMC2173791	PLoS One	2003							24474198																		23049975
12927048	PMC194750	PLoS One	2003							24487385																		23055939
12928149	PMC1241634	PLoS One	2003							24487410																		23056194
12932298	PMC184451	PLoS One	2003							24487722																		23056220
12948886	PMC1241649	PLoS One	2003							24520211																		23056417
12952532	PMC193653	PLoS One	2003							24520351																		23056565
12952934	PMC2172825	PLoS One	2003							24520385																		23071445
12953096	PMC2194195	PLoS One	2003							24521863																		23071453
12959643	PMC194658	PLoS One	2003							24524628																		23071596
12959645	PMC212298	PLoS One	2003							24528602																		23071606
12975459	PMC2194209	PLoS One	2003							24555445																		23071621
14499003	PMC239990	PLoS One	2003							24555849																		23071727
14514469	PMC1781621	PLoS One	2003							24572994																		23077527
14519200	PMC328454	PLoS One	2003							24577582																		23077633
14519209	PMC239997	PLoS One	2003							24580964																		23077668
14527838	PMC1241680	PLoS One	2003							24581171																		23082150
14557413	PMC2194236	PLoS One	2003							24583651																		23082856
14567759	PMC270058	PLoS One	2003							24586805																		23087045
14570596	PMC521186	PLoS One	2003							24586935																		23091362
14575155	PMC2270677	PLoS One	2003							24586946																		23093855
14580254	PMC314403	PLoS One	2003							24587106																		23110050
14581608	PMC2194253	PLoS One	2003							24587276																		23110206
14594625	PMC1241717	PLoS One	2003							24587336																		23110504
14597732	PMC2194250	PLoS One	2003							24594904																		23112876
14597776	PMC2173637	PLoS One	2003							24595136																		23117930
14610022	PMC2229593	PLoS One	2003							24599172																		23119043
14610064	PMC2173664	PLoS One	2003							24603706																		23119095
14613547	PMC305340	PLoS One	2003							24613975																		23129750
14623911	PMC2194122	PLoS One	2003							24615175																		23133641
14623913	PMC2194126	PLoS One	2003							24616582																		23139828
14630516	PMC1241748	PLoS One	2003							24625085																		23139842
14630569	PMC2478601	PLoS One	2003							24626992																		23144617
14644661	PMC1241761	PLoS One	2003							24633240																		23150788
14657235	PMC2173615	PLoS One	2003							24642245																		23152933
14659016	PMC329418	PLoS One	2003							24647439																		23155407
14676301	PMC2194158	PLoS One	2003							24652769																		23160237
14676814	PMC2395278	PLoS One	2003							24669276																		23166506
14687413	PMC317291	PLoS One	2003							24674692																		23166514
14691138	PMC2173726	PLoS One	2003							24678763																		23166685
14691545	PMC300684	PLoS One	2003							24681606																		23172351
14748931	PMC314399	PLoS One	2003							24683044																		23173713
14768947	PMC2485409	PLoS One	2003							24684778																		23185535
14768952	PMC2485411	PLoS One	2003							24694877																		23185565
15152982	PMC2565430	PLoS One	2003							24699568																		23191958
15152984	PMC2565429	PLoS One	2003							24710119																		23192105
15152985	PMC2565428	PLoS One	2003							24714917																		23205266
14709542	PMC2171953	PLoS One	2004							24722367																		23209315
14709543	PMC2171975	PLoS One	2004							24726326																		23209425
14711384	PMC324393	PLoS One	2004							24729479																		23209637
14720304	PMC331410	PLoS One	2004							24741073																		23209647
14723793	PMC340383	PLoS One	2004							24742286																		23209725
14728723	PMC324400	PLoS One	2004							24742783																		23217200
14734525	PMC2211772	PLoS One	2004							24743153																		23226316
14737183	PMC314463	PLoS One	2004							24743582																		23226497
14745002	PMC2172228	PLoS One	2004							24747802																		23227269
14757744	PMC2211797	PLoS One	2004							24748051																		23231953
14760387	PMC2409590	PLoS One	2004							24752294																		23236499
14760388	PMC2410155	PLoS One	2004							24756564																		23236515
14760392	PMC2409587	PLoS One	2004							24782648																		23236530
14769854	PMC2211827	PLoS One	2004							24788257																		23245876
14769860	PMC2171977	PLoS One	2004							24788789																		23249743
14966344	PMC2822266	PLoS One	2004							24806510																		23249765
14970180	PMC2211833	PLoS One	2004							24811761																		23251331
14970872	PMC2410181	PLoS One	2004							24824754																		23251447
14979920	PMC400652	PLoS One	2004							24827739																		23251483
15005800	PMC341451	PLoS One	2004							24827933																		23253693
15018652	PMC362866	PLoS One	2004							24828543																		23254291
15038832	PMC406505	PLoS One	2004							24830315																		23270529
15040800	PMC394351	PLoS One	2004							24831228																		23284626
15043762	PMC404372	PLoS One	2004							24832488																		23284644
15051735	PMC2172066	PLoS One	2004							24846270																		23284831
15051805	PMC2217464	PLoS One	2004							24853369																		23285108
15059279	PMC400434	PLoS One	2004							24853419																		23285140
15061865	PMC400732	PLoS One	2004							24857924																		23285273
15061870	PMC416661	PLoS One	2004							24858487																		23300470
15064167	PMC1241927	PLoS One	2004							24859320																		23300874
15067018	PMC2172097	PLoS One	2004							24859530																		23300905
15067019	PMC2172083	PLoS One	2004							24860830																		23300918
15078896	PMC2211895	PLoS One	2004							24865346																		23300938
15083202	PMC2409700	PLoS One	2004							24884657																		23300939
15084239	PMC400667	PLoS One	2004							24884715																		22773755
15090077	PMC419337	PLoS One	2004							24885183																		22846639
15099400	PMC419359	PLoS One	2004							24885328																		22864020
15102324	PMC419703	PLoS One	2004							24885518																		22864021
15102331	PMC419339	PLoS One	2004							24886063																		22959727
15102332	PMC408346	PLoS One	2004							24886204																		23065636
15113415	PMC419713	PLoS One	2004							24892425																		23065637
15115540	PMC420239	PLoS One	2004							24893165																		23087021
15117419	PMC420238	PLoS One	2004							24916956																		23118341
15123744	PMC2211902	PLoS One	2004							24920908																		23175609
15128445	PMC416467	PLoS One	2004							24923427																		23180777
15134587	PMC434499	PLoS One	2004							24938229																		23184605
15134589	PMC419479	PLoS One	2004							24950740																		23188702
15138490	PMC2409470	PLoS One	2004							24950741																		23188827
15142268	PMC416444	PLoS One	2004							24954394																		23224839
15142272	PMC416449	PLoS One	2004							24958442																		23250356
15142275	PMC416452	PLoS One	2004							24963216																		23254930
15148307	PMC2172360	PLoS One	2004							24979267																		23264561
15148336	PMC2211809	PLoS One	2004							24979756																		23276394
15149546	PMC434530	PLoS One	2004							24986896																		23281774
15154615	PMC2275402	PLoS One	2004							24994118																		23289709
15171793	PMC428577	PLoS One	2004							24997609																		23295128
15173206	PMC2211779	PLoS One	2004							25000529																		23300487
15175105	PMC443512	PLoS One	2004							25004451																		23301081
15175167	PMC1242007	PLoS One	2004							25012362																		23301088
15186505	PMC442125	PLoS One	2004							25014774																		23302418
15198801	PMC446228	PLoS One	2004							25023195																		23308226
15200685	PMC441376	PLoS One	2004							25030093																		23316765
15203560	PMC1781532	PLoS One	2004							25033273																		23320088
15203566	PMC1781530	PLoS One	2004							25050144																		23326332
15208716	PMC423138	PLoS One	2004							25059102																		23326437
15213711	PMC2409806	PLoS One	2004							25060352																		23326597
15223610	PMC1781562	PLoS One	2004							25062348																		23335206
15226307	PMC2172145	PLoS One	2004							25069779																		23341224
15226823	PMC439783	PLoS One	2004							25077564																		23341784
15236666	PMC481062	PLoS One	2004							25079962																		23349361
15238603	PMC2213313	PLoS One	2004							25093718																		23349684
15238604	PMC2213317	PLoS One	2004							25100208																		23349715
15239832	PMC463309	PLoS One	2004							25110884																		23349722
15245582	PMC481063	PLoS One	2004							25114527																		23349894
15263029	PMC2212014	PLoS One	2004							25114529																		23359803
15263030	PMC2212021	PLoS One	2004							25118887																		23374228
15272933	PMC503389	PLoS One	2004							25133686																		23379588
15279680	PMC509244	PLoS One	2004							25170306																		23380860
15279681	PMC506778	PLoS One	2004							25266877																		23382922
15289495	PMC2172268	PLoS One	2004							25326065																		23382946
15289500	PMC2211974	PLoS One	2004							25367255																		23382963
15302854	PMC2172221	PLoS One	2004																									23383129
15302899	PMC2211930	PLoS One	2004																									23383193
15302904	PMC2211927	PLoS One	2004																									23383290
15314066	PMC2172216	PLoS One	2004																									23388435
15314072	PMC2211932	PLoS One	2004																									23388701
15314648	PMC509294	PLoS One	2004																									23390510
15314659	PMC509305	PLoS One	2004																									23405058
15316567	PMC2410014	PLoS One	2004																									23405071
15316568	PMC2409901	PLoS One	2004																									23405115
15317656	PMC516769	PLoS One	2004																									23409115
15318933	PMC549171	PLoS One	2004																									23409128
15318935	PMC549169	PLoS One	2004																									23409176
15318939	PMC549175	PLoS One	2004																									23409868
15320950	PMC516044	PLoS One	2004																									23414597
15324552	PMC3323317	PLoS One	2004																									23418431
15331020	PMC517497	PLoS One	2004																									23418438
15339634	PMC2697194	PLoS One	2004																									23418536
15345372	PMC1277119	PLoS One	2004																									23418567
15353557	PMC2212740	PLoS One	2004																									23418589
15354213	PMC2409914	PLoS One	2004																									23421753
15377394	PMC521689	PLoS One	2004																									23424202
15380040	PMC546278	PLoS One	2004																									23432455
15380043	PMC546283	PLoS One	2004																									23437220
15380048	PMC546288	PLoS One	2004																									23441122
15383155	PMC521682	PLoS One	2004																									23441200
15385055	PMC524167	PLoS One	2004																									23448240
15385057	PMC521690	PLoS One	2004																									23451271
15452198	PMC2233901	PLoS One	2004																									23451282
15458574	PMC524361	PLoS One	2004																									23457544
15461794	PMC545595	PLoS One	2004																									23459932
15467769	PMC2410018	PLoS One	2004																									23462811
15473909	PMC535906	PLoS One	2004																									23462987
15473914	PMC524509	PLoS One	2004																									23468640
15483348	PMC2816335	PLoS One	2004																									23468919
15488153	PMC526762	PLoS One	2004																									23469037
15492041	PMC2172536	PLoS One	2004																									23470541
15492127	PMC2211844	PLoS One	2004																									23470542
15504237	PMC534115	PLoS One	2004																									23471914
15504820	PMC2211853	PLoS One	2004																									23472112
15504823	PMC2211860	PLoS One	2004																									23475610
15504904	PMC2234002	PLoS One	2004																									23479740
15512785	PMC2478629	PLoS One	2004																									23489026
15512789	PMC2478632	PLoS One	2004																									23489322
15522118	PMC534100	PLoS One	2004																									23497285
15534372	PMC2211912	PLoS One	2004																									23503602
15534693	PMC526179	PLoS One	2004																									23505062
15537430	PMC535545	PLoS One	2004																									23505376
15538945	PMC534803	PLoS One	2004																									23514826
15538947	PMC533879	PLoS One	2004																									23516444
15545317	PMC2172580	PLoS One	2004																									23519028
15545322	PMC2172587	PLoS One	2004																									23520469
15579417	PMC1253663	PLoS One	2004																									23520473
15583012	PMC2211941	PLoS One	2004																									23527305
15583018	PMC2211944	PLoS One	2004																									23531041
15588312	PMC549719	PLoS One	2004																									23531149
15596525	PMC2211990	PLoS One	2004																									23536825
15598614	PMC1247660	PLoS One	2004																									23540940
15601467	PMC544352	PLoS One	2004																									23543914
15601543	PMC3525071	PLoS One	2004																									23547100
15611331	PMC2172623	PLoS One	2004																									23554921
15611337	PMC2172617	PLoS One	2004																									23554981
15613247	PMC544869	PLoS One	2004																									23556432
15615595	PMC545075	PLoS One	2004																									23557178
15619330	PMC544401	PLoS One	2004																									23560052
15770049	PMC1781583	PLoS One	2004																									23560889
15770054	PMC1781580	PLoS One	2004																									23560952
15608191	PMC539964	PLoS One	2005																									23565077
15608240	PMC540067	PLoS One	2005																									23565179
15608249	PMC539965	PLoS One	2005																									23565247
15608268	PMC540038	PLoS One	2005																									23565921
15626652	PMC1253714	PLoS One	2005																									23573275
15636635	PMC546414	PLoS One	2005																									23577145
15638941	PMC545934	PLoS One	2005																									23577177
15642097	PMC549066	PLoS One	2005																									23580201
15642100	PMC549069	PLoS One	2005																									23587304
15642117	PMC545969	PLoS One	2005																									23590629
15642120	PMC546236	PLoS One	2005																									23593020
15642165	PMC1064114	PLoS One	2005																									23593159
15642742	PMC2212792	PLoS One	2005																									23593276
15647111	PMC546210	PLoS One	2005																									23595275
15647114	PMC546212	PLoS One	2005																									23596507
15647502	PMC546141	PLoS One	2005																									23596509
15647503	PMC546146	PLoS One	2005																									23597049
15651998	PMC546195	PLoS One	2005																									23598647
15655542	PMC2361839	PLoS One	2005																									23607899
15655545	PMC2361831	PLoS One	2005																									23611944
15656914	PMC548148	PLoS One	2005																									23613811
15657392	PMC2171577	PLoS One	2005																									23613869
15659575	PMC548374	PLoS One	2005																									23613947
15663794	PMC548519	PLoS One	2005																									23620781
15676071	PMC548520	PLoS One	2005																									23626716
15679890	PMC549206	PLoS One	2005																									23626768
15681617	PMC548358	PLoS One	2005																									23630570
15684094	PMC2217499	PLoS One	2005																									23631660
15687378	PMC548380	PLoS One	2005																									23637762
15689237	PMC549198	PLoS One	2005																									23637888
15701174	PMC549044	PLoS One	2005																									23637912
15703070	PMC549196	PLoS One	2005																									23638043
15710036	PMC550649	PLoS One	2005																									23638068
15710042	PMC552313	PLoS One	2005																									23639135
15712601	PMC2270721	PLoS One	2005																									23642031
15717926	PMC553966	PLoS One	2005																									23643691
15720714	PMC551616	PLoS One	2005																									23650566
15720718	PMC554098	PLoS One	2005																									23653679
15722482	PMC549413	PLoS One	2005																									23658612
15725345	PMC554105	PLoS One	2005																									23658713
15738050	PMC2234018	PLoS One	2005																									23659495
15738056	PMC2212840	PLoS One	2005																									23663320
15743485	PMC1065330	PLoS One	2005																									23667480
15743533	PMC555560	PLoS One	2005																									23667691
15743722	PMC1253759	PLoS One	2005																									23671637
15748290	PMC555575	PLoS One	2005																									23671652
15748293	PMC1079818	PLoS One	2005																									23672668
15757516	PMC555945	PLoS One	2005																									23675524
15762989	PMC1079863	PLoS One	2005																									23681668
15770062	PMC1482874	PLoS One	2005																									23684315
15774010	PMC1079866	PLoS One	2005																									23685551
15774030	PMC1088948	PLoS One	2005																									23686791
15777472	PMC1083414	PLoS One	2005																									23690968
15781580	PMC2213093	PLoS One	2005																									23691153
15781585	PMC2213107	PLoS One	2005																									23691195
15784609	PMC1069131	PLoS One	2005																									23691255
15784610	PMC1069132	PLoS One	2005																									23696854
15788101	PMC1079893	PLoS One	2005																									23700454
15790393	PMC1079840	PLoS One	2005																									23704923
15790423	PMC1084244	PLoS One	2005																									23707074
15798764	PMC2362014	PLoS One	2005																									23710445
15799711	PMC1073695	PLoS One	2005																									23717459
15809355	PMC2213126	PLoS One	2005																									23717624
15813959	PMC1079936	PLoS One	2005																									23724084
15819984	PMC1084363	PLoS One	2005																									23734278
15823198	PMC1090560	PLoS One	2005																									23737982
15824082	PMC2213159	PLoS One	2005																									23740718
15824086	PMC2213152	PLoS One	2005																									23741377
15826307	PMC1087481	PLoS One	2005																									23741431
15826318	PMC1087490	PLoS One	2005																									23755160
15831785	PMC1079974	PLoS One	2005																									23755170
15833106	PMC1131927	PLoS One	2005																									23755187
15833115	PMC1097760	PLoS One	2005																									23762378
15836790	PMC1087843	PLoS One	2005																									23762454
15837801	PMC2171868	PLoS One	2005																									23764200
15850489	PMC1097738	PLoS One	2005																									23764848
15860526	PMC3583090	PLoS One	2005																									23775142
15861499	PMC2823022	PLoS One	2005																									23785461
15866887	PMC2171928	PLoS One	2005																									23792494
15867092	PMC2213197	PLoS One	2005																									23798567
15869705	PMC1131923	PLoS One	2005																									23798570
15869716	PMC1090583	PLoS One	2005																									23805379
15876356	PMC1142324	PLoS One	2005																									23805778
15883201	PMC2171943	PLoS One	2005																									23805920
15892893	PMC1156883	PLoS One	2005																									23806618
15892897	PMC1156872	PLoS One	2005																									23825561
15897263	PMC2171694	PLoS One	2005																									23826306
15907208	PMC1166550	PLoS One	2005																									23828046
15910693	PMC1168891	PLoS One	2005																									23828222
15911875	PMC2171702	PLoS One	2005																									23828267
15911876	PMC2171686	PLoS One	2005																									23835187
15914664	PMC1140086	PLoS One	2005																									23837666
15917436	PMC1140370	PLoS One	2005																									23840007
15921521	PMC1166548	PLoS One	2005																									23840307
15921522	PMC1187905	PLoS One	2005																									23840597
15928667	PMC2361830	PLoS One	2005																									23840675
15938754	PMC1181811	PLoS One	2005																									23844236
15938756	PMC1177942	PLoS One	2005																									23844828
15951513	PMC1150221	PLoS One	2005																									23846963
15955838	PMC2212040	PLoS One	2005																									23851663
15955839	PMC2212034	PLoS One	2005																									23853428
15960800	PMC1175968	PLoS One	2005																									23866078
15967025	PMC1183203	PLoS One	2005																									23867462
15967817	PMC2212041	PLoS One	2005																									23867907
15969763	PMC1183217	PLoS One	2005																									23870245
15978133	PMC1168899	PLoS One	2005																									23873129
15980450	PMC1160239	PLoS One	2005																									23874234
15980520	PMC1160191	PLoS One	2005																									23874687
15980532	PMC1160243	PLoS One	2005																									23875003
15987429	PMC1143557	PLoS One	2005																									23877404
15987449	PMC1175057	PLoS One	2005																									23880880
15987519	PMC1177993	PLoS One	2005																									23892605
15987787	PMC1159121	PLoS One	2005																									23894429
15988804	PMC2815809	PLoS One	2005																									23894578
15996270	PMC1192791	PLoS One	2005																									23900282
15998445	PMC1175987	PLoS One	2005																									23903682
15998448	PMC1175990	PLoS One	2005																									23912553
15998450	PMC1175992	PLoS One	2005																									23914984
15998787	PMC2212893	PLoS One	2005																									23915208
16009717	PMC2213000	PLoS One	2005																									23917463
16011810	PMC1190170	PLoS One	2005																									23922229
16026622	PMC1180855	PLoS One	2005																									23922741
16027110	PMC1175460	PLoS One	2005																									23922830
16027237	PMC2213013	PLoS One	2005																									23922890
16030394	PMC1533905	PLoS One	2005																									23924076
16033648	PMC1199591	PLoS One	2005																									23924318
16045796	PMC1184102	PLoS One	2005																									23925565
16050148	PMC2270731	PLoS One	2005																									23927715
16050778	PMC1181539	PLoS One	2005																									23934451
16079067	PMC1280337	PLoS One	2005																									23935126
16079073	PMC1280343	PLoS One	2005																									23935822
16086854	PMC1273639	PLoS One	2005																									23935936
16091136	PMC1199625	PLoS One	2005																									23935986
16092963	PMC1201170	PLoS One	2005																									23936040
16092971	PMC1215515	PLoS One	2005																									23936129
16093013	PMC2697223	PLoS One	2005																									23936174
16098230	PMC1198228	PLoS One	2005																									23936214
16100440	PMC2782144	PLoS One	2005																									23936403
16100447	PMC2782151	PLoS One	2005																									23936499
16102169	PMC1208947	PLoS One	2005																									23936608
16103409	PMC2212859	PLoS One	2005																									23938054
16103410	PMC2212851	PLoS One	2005																									23940673
16105171	PMC1199588	PLoS One	2005																									23940690
16109167	PMC1208862	PLoS One	2005																									23943375
16109169	PMC1208873	PLoS One	2005																									23951051
16109179	PMC1208961	PLoS One	2005																									23951061
16110338	PMC1186732	PLoS One	2005																									23951225
16111501	PMC1215513	PLoS One	2005																									23967295
16121255	PMC1189073	PLoS One	2005																									23967309
16121256	PMC1189074	PLoS One	2005																									23968752
16122387	PMC1199600	PLoS One	2005																									23976982
16122396	PMC1215528	PLoS One	2005																									23976996
16126496	PMC1784569	PLoS One	2005																									23977020
16129773	PMC2266575	PLoS One	2005																									23977027
16134771	PMC3891385	PLoS One	2005																									23977210
16137333	PMC1215517	PLoS One	2005																									23977226
16159402	PMC1236918	PLoS One	2005																									23977274
16164761	PMC1242256	PLoS One	2005																									23977276
16168056	PMC1261257	PLoS One	2005																									23977396
16168064	PMC1249555	PLoS One	2005																									23983587
16168101	PMC1242122	PLoS One	2005																									23990976
16168115	PMC1242134	PLoS One	2005																									24008733
16168116	PMC1242139	PLoS One	2005																									24009748
16172261	PMC2212947	PLoS One	2005																									24011127
16176578	PMC1249589	PLoS One	2005																									24014320
16184189	PMC1215388	PLoS One	2005																									24014913
16184191	PMC1231717	PLoS One	2005																									24015201
16186562	PMC2266621	PLoS One	2005																									24020404
16192669	PMC1526479	PLoS One	2005																									24022275
16194280	PMC1262719	PLoS One	2005																									24022509
16194522	PMC2697228	PLoS One	2005																									24023695
16202171	PMC1277844	PLoS One	2005																									24023774
16207337	PMC1257424	PLoS One	2005																									24025218
16207355	PMC1257467	PLoS One	2005																									24025516
16220146	PMC1250929	PLoS One	2005																									24030951
16221973	PMC1253828	PLoS One	2005																									24039599
16224148	PMC2779271	PLoS One	2005																									24039757
16230462	PMC2171208	PLoS One	2005																									24039817
16247026	PMC2171177	PLoS One	2005																									24039873
16247030	PMC2171185	PLoS One	2005																									24040091
16248680	PMC1275525	PLoS One	2005																									24040215
16250670	PMC1274279	PLoS One	2005																									24040390
16250671	PMC1274282	PLoS One	2005																									24056696
16251872	PMC2361508	PLoS One	2005																									24058569
16259067	PMC2810575	PLoS One	2005																									24058581
16260491	PMC2213235	PLoS One	2005																									24058586
16260499	PMC2171243	PLoS One	2005																									24058604
16262446	PMC1278937	PLoS One	2005																									24067070
16263501	PMC1310908	PLoS One	2005																									24068166
16263514	PMC1310921	PLoS One	2005																									24069168
16277667	PMC1298327	PLoS One	2005																									24069173
16277687	PMC1297583	PLoS One	2005																									24069174
16277692	PMC1297587	PLoS One	2005																									24069328
16280035	PMC1410776	PLoS One	2005																									24069332
16280085	PMC1322230	PLoS One	2005																									24069439
16286506	PMC2266594	PLoS One	2005																									24086135
16288566	PMC1297556	PLoS One	2005																									24086324
16288658	PMC1299325	PLoS One	2005																									24086450
16293190	PMC1318460	PLoS One	2005																									24086523
16300676	PMC1325271	PLoS One	2005																									24086556
16304607	PMC1287907	PLoS One	2005																									24086650
16305740	PMC1322225	PLoS One	2005																									24086745
16309547	PMC1316879	PLoS One	2005																									24089686
16316466	PMC1325973	PLoS One	2005																									24090101
16324223	PMC1325022	PLoS One	2005																									24098472
16336643	PMC1325247	PLoS One	2005																									24109434
16336681	PMC1327675	PLoS One	2005																									24113175
16352739	PMC2212965	PLoS One	2005																									24116126
16352741	PMC2212956	PLoS One	2005																									24119209
16356265	PMC1414076	PLoS One	2005																									24124461
16359546	PMC1334210	PLoS One	2005																									24124525
16361265	PMC1316119	PLoS One	2005																									24124567
16361819	PMC2779306	PLoS One	2005																									24128676
16362077	PMC1315279	PLoS One	2005																									24139484
16365160	PMC2171301	PLoS One	2005																									24141843
16371158	PMC1334202	PLoS One	2005																									24143194
16375772	PMC1351194	PLoS One	2005																									24160175
16381610	PMC1363358	PLoS One	2005																									24168240
16403953	PMC3851399	PLoS One	2005																									24170720
16420669	PMC1414108	PLoS One	2005																									24170981
16457691	PMC1410760	PLoS One	2005																									24171758
16584108	PMC2270741	PLoS One	2005																									24172198
16705798	PMC3814693	PLoS One	2005																									24175087
16705807	PMC3814703	PLoS One	2005																									24175617
16318410	PMC1298941	PLoS One	2006																									24188129
16356201	PMC1526570	PLoS One	2006																									24188521
16380512	PMC2118077	PLoS One	2006																									24192137
16381849	PMC1347432	PLoS One	2006																									24204323
16381933	PMC1347448	PLoS One	2006																									24204618
16381934	PMC1347437	PLoS One	2006																									24204848
16381949	PMC1347369	PLoS One	2006																									24205011
16381950	PMC1347459	PLoS One	2006																									24205018
16381964	PMC1347489	PLoS One	2006																									24205258
16409625	PMC1360103	PLoS One	2006																									24205261
16412244	PMC1382249	PLoS One	2006																									24205293
16417656	PMC1413978	PLoS One	2006																									24223757
16420690	PMC1382248	PLoS One	2006																									24223856
16433929	PMC1382200	PLoS One	2006																									24223903
16434844	PMC3242080	PLoS One	2006																									24223940
16434849	PMC3242085	PLoS One	2006																									24223972
16438730	PMC1403805	PLoS One	2006																									24223980
16438734	PMC1434738	PLoS One	2006																									24224027
16440055	PMC1331978	PLoS One	2006																									24224996
16446378	PMC2118213	PLoS One	2006																									24232095
16446379	PMC2118195	PLoS One	2006																									24236044
16446502	PMC2151492	PLoS One	2006																									24236177
16446508	PMC2151493	PLoS One	2006																									24244296
16448577	PMC1444921	PLoS One	2006																									24244454
16449199	PMC1356536	PLoS One	2006																									24244457
16449997	PMC2361176	PLoS One	2006																									24244464
16450009	PMC1358942	PLoS One	2006																									24244517
16451738	PMC1373636	PLoS One	2006																									24244537
16457726	PMC1420324	PLoS One	2006																									24244584
16464245	PMC1413522	PLoS One	2006																									24244600
16464823	PMC1361618	PLoS One	2006																									24252211
16476767	PMC2118219	PLoS One	2006																									24252227
16476768	PMC2118221	PLoS One	2006																									24252347
16476771	PMC2118202	PLoS One	2006																									24252411
16476774	PMC2063673	PLoS One	2006																									24253616
16478293	PMC1370925	PLoS One	2006																									24256636
16478543	PMC1403745	PLoS One	2006																									24260176
16478711	PMC1369290	PLoS One	2006																									24260397
16502487	PMC2687583	PLoS One	2006																									24260480
16503978	PMC1395303	PLoS One	2006																									24265785
16504050	PMC1403752	PLoS One	2006																									24274089
16504082	PMC1395308	PLoS One	2006																									24274622
16504143	PMC1420314	PLoS One	2006																									24278116
16504164	PMC1436015	PLoS One	2006																									24278223
16504174	PMC1420271	PLoS One	2006																									24278302
16505141	PMC2118242	PLoS One	2006																									24278307
16505148	PMC2151501	PLoS One	2006																									24282339
16507125	PMC1526566	PLoS One	2006																									24282497
16507138	PMC1431701	PLoS One	2006																									24286165
16507151	PMC1526604	PLoS One	2006																									24289537
16507453	PMC1392224	PLoS One	2006																									24293254
16507464	PMC1392235	PLoS One	2006																									24301648
16508635	PMC2361372	PLoS One	2006																									24303013
16515684	PMC1448202	PLoS One	2006																									24303073
16518469	PMC1383486	PLoS One	2006																									24312227
16518691	PMC1403820	PLoS One	2006																									24312364
16522199	PMC1475891	PLoS One	2006																									24312420
16522209	PMC1525166	PLoS One	2006																									24313976
16524461	PMC1431530	PLoS One	2006																									24321498
16524466	PMC1434756	PLoS One	2006																									24324407
16533410	PMC1431562	PLoS One	2006																									24324591
16536871	PMC1421424	PLoS One	2006																									24324755
16536875	PMC1450299	PLoS One	2006																									24324819
16536879	PMC1479377	PLoS One	2006																									24330773
16539717	PMC1458322	PLoS One	2006																									24336051
16545113	PMC1434751	PLoS One	2006																									24336074
16545115	PMC1459156	PLoS One	2006																									24336078
16545124	PMC1513603	PLoS One	2006																									24336108
16551360	PMC1440853	PLoS One	2006																									24341866
16553963	PMC1459145	PLoS One	2006																									24344647
16556311	PMC1440862	PLoS One	2006																									24344990
16563162	PMC1444935	PLoS One	2006																									24349043
16566828	PMC1475846	PLoS One	2006																									24349046
16567464	PMC2151510	PLoS One	2006																									24349101
16567502	PMC2063762	PLoS One	2006																									24349357
16571105	PMC1448185	PLoS One	2006																									24364862
16571114	PMC1458334	PLoS One	2006																									24367272
16571124	PMC1456967	PLoS One	2006																									24367693
16571131	PMC1448171	PLoS One	2006																									24376631
16573824	PMC1444931	PLoS One	2006																									24376810
16579851	PMC1513606	PLoS One	2006																									24376837
16579862	PMC1483818	PLoS One	2006																									24379900
16581547	PMC1440782	PLoS One	2006																									24385930
16582102	PMC1421506	PLoS One	2006																									24386444
16597326	PMC1456969	PLoS One	2006																									24392452
16602821	PMC1413568	PLoS One	2006																									24453891
16604157	PMC1428789	PLoS One	2006																									24454471
16606669	PMC1584282	PLoS One	2006																									24455732
16608531	PMC1468398	PLoS One	2006																									24456799
16611356	PMC1513214	PLoS One	2006																									23246779
16611361	PMC1481595	PLoS One	2006																									23897221
16611364	PMC1481519	PLoS One	2006																									23908553
16614447	PMC1435979	PLoS One	2006																									24009314
16614519	PMC2734009	PLoS One	2006																									24039209
16618793	PMC2121200	PLoS One	2006																									24055500
16618815	PMC2063810	PLoS One	2006																									24117685
16620153	PMC1440932	PLoS One	2006																									24161480
16626500	PMC1462998	PLoS One	2006																									24210254
16636131	PMC2121204	PLoS One	2006																									24225640
16640787	PMC1459854	PLoS One	2006																									24270802
16645341	PMC3242108	PLoS One	2006																									24284732
16670015	PMC1482699	PLoS One	2006																									24316510
16672050	PMC1513246	PLoS One	2006																									24323121
16672052	PMC1481602	PLoS One	2006																									24326964
16674807	PMC1464123	PLoS One	2006																									24333574
16674826	PMC1513230	PLoS One	2006																									24335844
16681857	PMC1479315	PLoS One	2006																									24341874
16683030	PMC1449890	PLoS One	2006																									24356899
16683032	PMC1449896	PLoS One	2006																									24361736
16683035	PMC1449902	PLoS One	2006																									24363064
16683036	PMC1449903	PLoS One	2006																									24405628
16700916	PMC1479353	PLoS One	2006																									24405637
16700923	PMC1475852	PLoS One	2006																									24423792
16704740	PMC1483896	PLoS One	2006																									24427314
16704744	PMC1779380	PLoS One	2006																									24428919
16704797	PMC3291462	PLoS One	2006																									24441878
16709251	PMC1513228	PLoS One	2006																									24446963
16717119	PMC2118311	PLoS One	2006																									24447368
16717126	PMC2063860	PLoS One	2006																									24448491
16719910	PMC1526727	PLoS One	2006																									24454724
16719922	PMC1488829	PLoS One	2006																									24463292
16722588	PMC1436004	PLoS One	2006																									24465814
16725020	PMC1489925	PLoS One	2006																									24466128
16725047	PMC1482685	PLoS One	2006																									24466346
16733553	PMC1464831	PLoS One	2006																									24468108
16759389	PMC1553469	PLoS One	2006																									24469566
16769824	PMC2063916	PLoS One	2006																									24469912
16772024	PMC1553451	PLoS One	2006																									24470489
16772045	PMC1533857	PLoS One	2006																									24475300
16784531	PMC1570144	PLoS One	2006																									24480485
16787531	PMC1557673	PLoS One	2006																									24489866
16789836	PMC1480599	PLoS One	2006																									24495352
16790046	PMC1533866	PLoS One	2006																									24496176
16796734	PMC1534053	PLoS One	2006																									24497575
16800892	PMC1557845	PLoS One	2006																									24498144
16805906	PMC1779393	PLoS One	2006																									24498172
16807991	PMC2688161	PLoS One	2006																									24498180
16823072	PMC3785675	PLoS One	2006																									24499735
16827931	PMC1543659	PLoS One	2006																									24503579
16831888	PMC2064179	PLoS One	2006																									24503708
16836832	PMC3291063	PLoS One	2006																									24503961
16839421	PMC1555595	PLoS One	2006																									24505322
16842020	PMC1513046	PLoS One	2006																									24512632
16842619	PMC1540436	PLoS One	2006																									24512669
16846249	PMC1484586	PLoS One	2006																									24516345
16848640	PMC1513261	PLoS One	2006																									24517102
16855282	PMC1524919	PLoS One	2006																									24517272
16871014	PMC3242119	PLoS One	2006																									24518227
16872513	PMC1562363	PLoS One	2006																									24521084
16872515	PMC1779388	PLoS One	2006																									24523853
16880254	PMC2118373	PLoS One	2006																									24525730
16880265	PMC2151529	PLoS One	2006																									24531797
16880268	PMC2064229	PLoS One	2006																									24533166
16882342	PMC3225868	PLoS One	2006																									24548049
16882537	PMC1552025	PLoS One	2006																									24549572
16884529	PMC1560171	PLoS One	2006																									24550686
16887003	PMC1779475	PLoS One	2006																									24551038
16891822	PMC2729900	PLoS One	2006																									24551095
16893448	PMC1564137	PLoS One	2006																									24555533
16893972	PMC2064257	PLoS One	2006																									24560379
16894012	PMC2118407	PLoS One	2006																									24561315
16894013	PMC2118391	PLoS One	2006																									24569833
16911800	PMC1560139	PLoS One	2006																									24572785
16914051	PMC1562429	PLoS One	2006																									24577081
16914058	PMC1563477	PLoS One	2006																									24577121
16919160	PMC1559720	PLoS One	2006																									24577234
16933996	PMC1557775	PLoS One	2006																									24586443
16934000	PMC1550283	PLoS One	2006																									24586561
16941747	PMC2687738	PLoS One	2006																									24586653
16945157	PMC1779446	PLoS One	2006																									24586687
16945951	PMC1636368	PLoS One	2006																									24586776
16951493	PMC1592600	PLoS One	2006																									24586787
16954039	PMC2689256	PLoS One	2006																									24586789
16954348	PMC2064342	PLoS One	2006																									24586817
16954369	PMC2118102	PLoS One	2006																									24586819
16959038	PMC1601957	PLoS One	2006																									24587232
16966083	PMC1570092	PLoS One	2006																									24587312
16966421	PMC2064334	PLoS One	2006																									24593993
16966473	PMC2151578	PLoS One	2006																									24594605
16968127	PMC1564176	PLoS One	2006																									24594686
16968540	PMC1601971	PLoS One	2006																									24595131
16973894	PMC1635289	PLoS One	2006																									24597481
16978410	PMC1578583	PLoS One	2006																									24599021
16978413	PMC1618400	PLoS One	2006																									24599700
16982003	PMC1779432	PLoS One	2006																									24601592
16982810	PMC2118110	PLoS One	2006																									24603771
[truncated: 13,312 more rows]
