# Supplementary material for: Bias in the reporting of sex and age in biomedical research on mouse models
Source: eLife. 2016 Mar 3;5:e13615. doi: 10.7554/eLife.13615 (PMC4821800; doi:10.7554/eLife.13615)
Supplement: Supplementary file 3. — DOI: http://dx.doi.org/10.7554/eLife.13615.014 [file elife-13615-supp3.docx]

**Supplementary file 3**

**RULES USED TO IDENTIFY THE SEX AND AGE OF EXPERIMENTAL MOUSE MODELS**

Our rules were created and applied via GATE –General Architecture for Text Engineering; an open source free software enabling the design and implementation of information extraction systems in unstructured text with the crafted rules following its notation.

**Rules for the identification of sex**

({Token.string ==~ "(?i)male"}|{Token.string ==~ "(?i)female"}|{Token.string ==~ "(?i)males"}|{Token.string ==~ "(?i)females"}|({Token.string ==~ "(?i)female"}{Token.string == "/"}{Token.string ==~ "(?i)male"})|({Token.string ==~ "(?i)male"}{Token.string == "/"}{Token.string ==~ "(?i)female"})|({Token.string ==~ "(?i)male"}{Token.string ==~ "(?i)and"}{Token.string ==~ "(?i)female"})|({Token.string ==~ "(?i)female"}{Token.string ==~ "(?i)and"}{Token.string ==~ "(?i)male"})|(

({Token.string ==~"(?i)age"}|{Token.string ==~"(?i)sex"})({Token.string == "-"})?{Token.string ==~"(?i)and"}({Token.string ==~"(?i)sex"}|{Token.string ==~"(?i)age"})({Token.string == "-"})?{Token.string ==~"(?i)matched"})|( ({Token.string ==~"(?i)age-"}|{Token.string ==~"(?i)sex-"}){Token.string ==~"(?i)and"}({Token.string ==~"(?i)sex-"}|{Token.string ==~"(?i)age-"}){Token.string ==~"(?i)matched"})|(({Token.string ==~"(?i)age-"}|{Token.string ==~"(?i)sex-"}){Token.string ==~"(?i)and"}({Token.string ==~"(?i)sex-matched"}|{Token.string ==~"(?i)age-matched"}))|({Token.string ==~"(?i)mice"}{Token.string ==~"(?i)of"}({Token.string ==~"(?i)both"}|{Token.string==~"(?i)either"})({Token.string ==~"(?i)sexes"}| {Token.string ==~"(?i)gender"}))

**Frozen lexical expression used as anchors inside the rules for the identification of age**

Macro: gender({Token.string ==~"(?i)male"}|{Token.string ==~"(?i)female"}|{Token.string ==~"(?i)males"}|{Token.string ==~"(?i)females"})

Macro: weeks({Token.string ==~"(?i)mts"}|{Token.string ==~"(?i)months"}|{Token.string ==~"(?i)days"}|{Token.string ==~"(?i)week"}|{Token.string ==~"(?i)wk"}|{Token.string ==~"(?i)weeks"}|{Token.string ==~"(?i)wks"}|{Token.string ==~"(?i)month-old"}|{Token.string ==~"(?i)months-old"}|{Token.string ==~"(?i)mts-old"}|{Token.string ==~"(?i)week-old"}|{Token.string ==~"(?i)weeks-old"}|{Token.string ==~"(?i)wks-old"}|{Token.string ==~"(?i)wk-old"}|{Token.string ==~"(?i)day-old"}|{Token.string ==~"(?i)days-old"}|{Token.string ==~"(?i)months"}{Token.string =="–"}{Token.string ==~"(?i)old"}|{Token.string ==~"(?i)month"}{Token.string =="–"}{Token.string ==~"(?i)old"}|{Token.string ==~"(?i)mts"}{Token.string =="–"}{Token.string ==~"(?i)old"}|{Token.string ==~"(?i)week"}{Token.string =="–"}{Token.string ==~"(?i)old"}|{Token.string ==~"(?i)wk"}{Token.string =="–"}{Token.string ==~"(?i)old"}|{Token.string ==~"(?i)weeks"}{Token.string =="–"}{Token.string ==~"(?i)old"} |{Token.string ==~"(?i)wks"}{Token.string =="–"}{Token.string ==~"(?i)old"}|{Token.string ==~"(?i)days"}{Token.string =="–"}{Token.string ==~"(?i)old"}|{Token.string ==~"(?i)day"}{Token.string =="–"}{Token.string ==~"(?i)old"}|{Token.string ==~"(?i)month"}{Token.string ==~"(?i)old"}|{Token.string ==~"(?i)mts"}{Token.string ==~"(?i)old"}|{Token.string ==~"(?i)months"}{Token.string ==~"(?i)old"} |{Token.string ==~"(?i)wks"}{Token.string ==~"(?i)old"}|{Token.string ==~"(?i)weeks"}{Token.string ==~"(?i)old"}|{Token.string ==~"(?i)wk"}{Token.string ==~"(?i)old"}|{Token.string ==~"(?i)d"}{Token.string ==~"(?i)old"}|{Token.string ==~"(?i)week"}{Token.string ==~"(?i)old"}|{Token.string ==~"(?i)weeks"}{Token.string ==~"(?i)of"}{Token.string ==~"(?i)age"}|{Token.string ==~"(?i)wks"}{Token.string ==~"(?i)of"}{Token.string ==~"(?i)age"}|{Token.string ==~"(?i)week"}{Token.string ==~"(?i)of"}{Token.string ==~"(?i)age"}|{Token.string ==~"(?i)wk"}{Token.string ==~"(?i)of"}{Token.string ==~"(?i)age"}|{Token.string ==~"(?i)month"}{Token.string ==~"(?i)of"}{Token.string ==~"(?i)age"}|{Token.string ==~"(?i)months"}{Token.string ==~"(?i)of"}{Token.string ==~"(?i)age"}|{Token.string ==~"(?i)mts"}{Token.string ==~"(?i)of"}{Token.string ==~"(?i)age"}|{Token.string ==~"(?i)days"}{Token.string ==~"(?i)of"}{Token.string ==~"(?i)age"})

Macro: whole_string_age({Token.string ==~"(?i)five-week-old"} |{Token.string ==~"(?i)six-week-old"}|{Token.string ==~"(?i)five-weeks-old"}|{Token.string ==~"(?i)six-weeks-old"}|{Token.string ==~"(?i)two-week-old"}|{Token.string ==~"(?i)three-week-old"}|{Token.string ==~"(?i)seven-week-old"}|{Token.string ==~"(?i)eight-week-old"}|{Token.string ==~"(?i)nine-week-old"}|{Token.string ==~"(?i)ten-week-old"}|{Token.string ==~"(?i)five-week"} |{Token.string ==~"(?i)six-week"}|{Token.string ==~"(?i)five-weeks"}|{Token.string ==~"(?i)six-weeks"}|{Token.string ==~"(?i)two-week"}|{Token.string ==~"(?i)three-week"}|{Token.string ==~"(?i)seven-week"}| {Token.string ==~"(?i)eight-week"}|{Token.string ==~"(?i)nine-week"}|{Token.string ==~"(?i)ten-week"})

Macro: wholte_string_age2({Token.string ==~"(?i)five-"} |{Token.string ==~"(?i)six-"}|{Token.string ==~"(?i)two-"}|{Token.string ==~"(?i)three-"}|{Token.string ==~"(?i)seven-"}| {Token.string ==~"(?i)eight-"}| {Token.string ==~"(?i)nine-"}| {Token.string ==~"(?i)ten-"})

Macro: numbers({Token.string ==~"[0-9]"}|{Token.string==~"[0-9]+"}|{Token.string ==~"(?i)one"}|{Token.string ==~"(?i)two"}|{Token.string ==~"(?i)three"}|{Token.string ==~"(?i)four"}|{Token.string ==~"(?i)five"}|{Token.string ==~"(?i)six"}|{Token.string ==~"(?i)seven"}|{Token.string ==~"(?i)eight"}|{Token.string ==~"(?i)nine"}|{Token.string ==~"(?i)ten"}|{Token.string ==~"(?i)eleven"}|{Token.string ==~"(?i)twelve"}|{Token.string ==~"(?i)thirteen"}|{Token.string ==~"(?i)fourteen"})

Macro: link({Token.string ==~"(?i)to"}|{Token.string =="-"}|{Token.string =="–"})

**Rules for the identification of age**

(({Token.string==~"(?i)embryos"}):age)|({Token.string==~"(?i)mice"}({Token})[0,2]{Token.string==~"(?i)age"}{Token.string==~"(?i)of"}((numbers)({Token})[0,1](numbers)?(weeks)):age )|({Token.string==~"(?i)mice"}({Token})[0,1]({Token.string==~"(?i)aged"})?((numbers)({Token})[0,1](numbers)?(weeks)):age )|({Token.string ==~"(?i)mice"}{Token.string ==~"(?i)were"}{Token.string ==~"(?i)used"}{Token.string ==~"(?i)for"}{Token.string ==~"(?i)experiments"}{Token.string ==~"(?i)at"}((numbers)({Token})[0,1](numbers)?(weeks)):age)|({Token.string ==~"(?i)mice"}{Token.string ==~"(?i)aged"}{Token.string ==~"(?i)between"}((numbers)({Token})[0,1](numbers)?(weeks)):age)|({Token.string ==~"(?i)mice"}{Token.string=="("}{Token.string ==~"(?i)average"}{Token.string ==~"(?i)age"}((numbers)({Token})[0,1](numbers)?(weeks)):age)|({Token.string ==~"(?i)mice"}{Token.string ==~"(?i)were"}{Token.string ==~"(?i)used"}{Token.string ==~"(?i)before"}((numbers)({Token})[0,1](numbers)?(weeks)):age)|(((numbers)({Token})[0,1](numbers)?(weeks)):age({Token})[0,2]{Token.string==~"(?i)mice"})|(((numbers)({Token})[0,1](numbers)?(weeks)):age({Token})[0,1]{Token.string ==~"(?i)C"}{Token.string ==~"57"}{Token.string ==~"(?i)bl"}{Token.string =="/"}{Token.string ==~"6"}({Token})[0,1]{Token.string ==~"(?i)mice"})|({Token.string==~"(?i)aged"} ((numbers)({Token})[0,1](numbers)?(weeks)({Token})[0,1]):age({Token.string==~"(?i)were"}|{Token.string==~"(?i)are"}))|(((numbers)({Token})[0,1]{Token.string==~"(?i)to"}(numbers)({Token})[0,1](numbers)?(weeks)):age (gender))|((gender)({Token})[0,1]((numbers)({Token})[0,1](numbers)?(weeks)):age)|(((numbers)({Token})[0,1](numbers)?(weeks)):age(gender))|((wholte_string_age):age({Token})[0,1](gender))|(((wholte_string_age2)({Token})(numbers)({Token})[0,1](numbers)?(weeks)):age(gender))|(((whole_string_age2)({Token})(wholte_string_age)({Token})[0,1]{Token.string ==~"(?i)old"}):age(gender))|({Token.string ==~"(?i)were"}({Token.string ==~"(?i)purchased"}|{Token.string=~"(?i)used"})({Token})[0,1]((numbers)({Token})[0,1](numbers)?(weeks)):age)|({Token.string==~"(?i)aged"}{Token.string==~"(?i)to"}((numbers)({Token})[0,1](numbers)?(weeks)):age

)
